# Supplementary material for: Alkyne aza-Prins cyclization ofN-(hexa-3,5-diynyl)tosylamides with aldehydes using triflic acid and a binuclear aluminum complex
Source: Royal Society of Chemistry journal article supplement (doi:10.1039/c9cc03700d), 2019-01-01
Supplement: c9cc03700d1.pdf [file c9cc03700d1.pdf]

## Electronic Supplementary Information

### Alkyne aza-Prins cyclization of *N*-(hexa-3,5-diynyl) tosylamides with aldehydes using triflic acid and binuclear aluminum complex

Naoko Kobayashi,<sup>a</sup> Kazuma Kaneko,<sup>b</sup> Sho Amemiya,<sup>a</sup> Keiichi Noguchi,<sup>c</sup> Masahiro Yamanaka<sup>\*b</sup>  
and Akio Saito<sup>\*a</sup>

<sup>a</sup>*Division of Applied Chemistry, Institute of Engineering, and <sup>c</sup>Instrumentation Analysis Center,  
Tokyo University of Agriculture and Technology,  
2-24-16 Naka-cho, Koganei, Tokyo 184-8588, Japan.*

*e-mail: akio-sai@cc.tuat.ac.jp*

<sup>b</sup>*Department of Chemistry and Research Center for Smart Molecules, Rikkyo University,  
3-34-1 Nishi-Ikebukuro, Toshima-ku, Tokyo 171-8501, Japan.*

*e-mail: myamanak@rikkyo.ac.jp*

## **Table of contents**

|                                                                                                                                                                                                                                            |     |
|--------------------------------------------------------------------------------------------------------------------------------------------------------------------------------------------------------------------------------------------|-----|
| Screening of Acids and Additives for Alkyne Aza-Prins Cyclization (Table S1).....                                                                                                                                                          | S2  |
| Alkyne Aza-Prins Cyclization of <b>1a</b> with Formaldehyde (Scheme S1).....                                                                                                                                                               | S3  |
| Comments on Reactions with Aliphatic Aldehydes under the Conditions <b>A</b> (Scheme S2).....                                                                                                                                              | S3  |
| Determination of Stereochemistries of Products (Figure S1–S9, Table S2).....                                                                                                                                                               | S4  |
| DFT Calculations on 6- <i>endo</i> and 5- <i>exo</i> Cyclization Pathways (Figure S10).....                                                                                                                                                | S7  |
| DFT Calculations of Models Derived from Benzaldehyde instead of Acetaldehyde (Figure S11).....                                                                                                                                             | S8  |
| General Information.....                                                                                                                                                                                                                   | S9  |
| Synthesis and Characterization of 3,5-Diynyl Tosylamides <b>1a</b> and <b>1b</b> .....                                                                                                                                                     | S9  |
| Synthesis and Characterization of TfO-Substituted Pyrrolidines <b>3</b> , Ring-Opening Products <b>5ba</b> , <b>5ca</b> and Tricyclic Compound <b>7</b> .....                                                                              | S10 |
| Synthesis and Characterization of F-Substituted Pyrrolidines <b>4aa</b> .....                                                                                                                                                              | S18 |
| Synthesis and Characterization of Cl-Substituted Pyrrolidines <b>6aa</b> .....                                                                                                                                                             | S18 |
| Suzuki-Miyaura Coupling Reaction of <b>3aa</b> .....                                                                                                                                                                                       | S19 |
| Sonogashira Coupling Reaction of <b>3aa</b> .....                                                                                                                                                                                          | S19 |
| <sup>1</sup> H and <sup>13</sup> C NMR spectra of new compounds <b>1a</b> , <b>1b</b> , <b>3aa–3am</b> , <b>3ba</b> , <b>5ba</b> , <b>3ca</b> , <b>5ca</b> , <b>3da</b> , <b>4aa</b> , <b>6aa</b> , <b>7</b> , <b>8</b> and <b>9</b> ..... | S20 |
| Cartesian Coordinates and Absolute Electronic Energies of Intermediates and Transition States.....                                                                                                                                         | S58 |

## Screening of Acids and Additives for Alkyne Aza-Prins Cyclization

**Table S1.** Screening of acids and additives for alkyne aza-Prins cyclization of **1a** with **2a**.

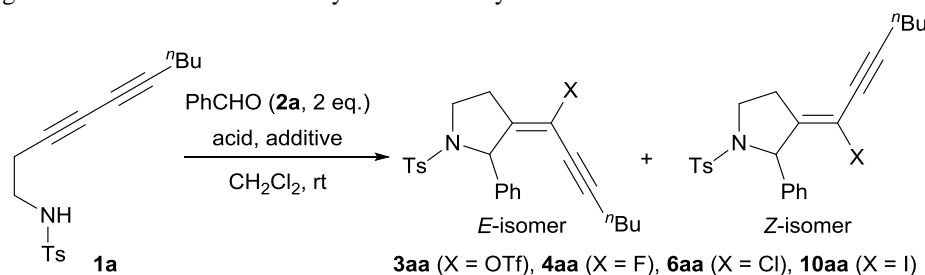

| Entry           | Acid (eq.)                             | Additive (eq.)                                           | Temp. (°C) | Time (h) | Product     | Yield <sup>a</sup> (%) | E:Z             | 1a <sup>a</sup> (%) |
|-----------------|----------------------------------------|----------------------------------------------------------|------------|----------|-------------|------------------------|-----------------|---------------------|
| 1               | HBF <sub>4</sub> ·OEt <sub>2</sub> (3) | MeOH (3)                                                 | rt         | 8        | <b>4aa</b>  | 17                     | 76:24           | 50                  |
| 2               | HBF <sub>4</sub> ·OEt <sub>2</sub> (3) |                                                          | rt         | 8        | <b>4aa</b>  | 0 <sup>b</sup>         | -               | 0                   |
| 3               | HBF <sub>4</sub> ·OEt <sub>2</sub> (3) |                                                          | -40        | 18       | <b>4aa</b>  | 47                     | 64:36           | 0                   |
| 4               | HBF <sub>4</sub> ·OEt <sub>2</sub> (3) |                                                          | -78        | 18       | <b>4aa</b>  | 2                      | nd <sup>c</sup> | 53                  |
| 5               | HBF <sub>4</sub> ·OEt <sub>2</sub> (3) | TBABF <sub>4</sub> (3)                                   | -40        | 18       | <b>4aa</b>  | 28                     | 58:42           | 29                  |
| 6               | HBF <sub>4</sub> ·OEt <sub>2</sub> (3) | TBABF <sub>4</sub> (2)                                   | -40        | 18       | <b>4aa</b>  | 50 <sup>d</sup>        | 59:41           | 0                   |
| 7               | HBF <sub>4</sub> ·OEt <sub>2</sub> (3) | TBABF <sub>4</sub> (1)                                   | -40        | 18       | <b>4aa</b>  | 45 <sup>d</sup>        | 61:39           | 0                   |
| 8               | HBF <sub>4</sub> ·OEt <sub>2</sub> (2) | TBABF <sub>4</sub> (2)                                   | -40        | 18       | <b>4aa</b>  | 36 <sup>d</sup>        | 69:31           | 13                  |
| 9               | HBF <sub>4</sub> ·OEt <sub>2</sub> (2) | TBABF <sub>4</sub> (2)                                   | rt         | 4        | <b>4aa</b>  | 12                     | 67:33           | 29                  |
| 10              | BF <sub>3</sub> ·OEt <sub>2</sub> (3)  |                                                          | rt         | 18       | <b>4aa</b>  | 21                     | 67:33           | 38                  |
| 11              | BF <sub>3</sub> ·MeCN (3)              |                                                          | rt         | 18       | <b>4aa</b>  | 8                      | nd <sup>c</sup> | 57                  |
| 12              | DMPU·HF (10)                           |                                                          | rt         | 18       | <b>4aa</b>  | 0                      | -               | Quant.              |
| 13 <sup>e</sup> | Py·HF (576)                            |                                                          | rt         | 24       | <b>4aa</b>  | 12                     | 67:33           | 0                   |
| 14              | HBF <sub>4</sub> ·OEt <sub>2</sub> (3) | (Me <sub>2</sub> AlO) <sub>2</sub> SO <sub>2</sub> (0.5) | rt         | 24       | <b>4aa</b>  | 13                     | nd <sup>c</sup> | 0                   |
| 15              | HBF <sub>4</sub> ·OEt <sub>2</sub> (3) | (Me <sub>2</sub> AlO) <sub>2</sub> SO <sub>2</sub> (0.5) | -40        | 24       | <b>4aa</b>  | 0                      | -               | 97                  |
| 16 <sup>f</sup> | Py·HF (3)                              | (Me <sub>2</sub> AlO) <sub>2</sub> SO <sub>2</sub> (0.5) | 80         | 24       | <b>4aa</b>  | 0                      | -               | 92                  |
| 17              | TfOH (3)                               |                                                          | rt         | 1        | <b>3aa</b>  | 67                     | 75:25           | 0                   |
| 18              | TfOH (2)                               |                                                          | rt         | 2        | <b>3aa</b>  | 67 <sup>d</sup>        | 75:25           | 0                   |
| 19              | TMSOTf (3)                             |                                                          | rt         | 8        | <b>3aa</b>  | 49                     | 69:31           | 0                   |
| 20 <sup>g</sup> | TMSOTf (3)                             |                                                          | rt         | 8        | <b>3aa</b>  | 51                     | 20:80           | 0                   |
| 21 <sup>g</sup> | TfOH (3)                               |                                                          | rt         | 18       | <b>3aa</b>  | trace                  | nd <sup>c</sup> | 50                  |
| 22 <sup>h</sup> | TfOH (2)                               | Al(OTf) <sub>3</sub> (2)                                 | rt         | 18       | <b>3aa</b>  | 58 <sup>d</sup>        | 74:26           | 0                   |
| 23 <sup>h</sup> | TfOH (2)                               | Zn(OTf) <sub>2</sub> (2)                                 | rt         | 18       | <b>3aa</b>  | 42                     | 69:31           | 0                   |
| 24 <sup>h</sup> | TfOH (2)                               | Sn(OTf) <sub>2</sub> (2)                                 | rt         | 18       | <b>3aa</b>  | 42                     | 81:19           | 0                   |
| 25              | TfOH (4)                               | Me <sub>3</sub> Al (1)                                   | rt         | 18       | <b>3aa</b>  | 46                     | 83:17           | 0                   |
| 26              | TfOH (4)                               | Et <sub>3</sub> B (1)                                    | rt         | 18       | <b>3aa</b>  | 59                     | 71:29           | 0                   |
| 27              | TfOH (3)                               | Et <sub>2</sub> Zn (1)                                   | rt         | 18       | <b>3aa</b>  | 21                     | 62:38           | 34                  |
| 28              | TfOH (5)                               | Et <sub>2</sub> Zn (1.5)                                 | rt         | 18       | <b>3aa</b>  | 56 <sup>d</sup>        | 73:27           | 34                  |
| 29              | TfOH (4)                               | Et <sub>2</sub> Zn (1)                                   | rt         | 18       | <b>3aa</b>  | 55                     | 69:41           | 0                   |
| 30              | TfOH (6.5)                             | Et <sub>2</sub> Zn (1.5)                                 | rt         | 18       | <b>3aa</b>  | 59                     | 71:29           | 0                   |
| 31              | TfOH (5)                               | Bu <sub>3</sub> SnH (1)                                  | rt         | 2        | <b>3aa</b>  | 55                     | 69:31           | 0                   |
| 32              | TfOH (4)                               | (Me <sub>2</sub> Al) <sub>2</sub> O (0.5)                | rt         | 18       | <b>3aa</b>  | 66 <sup>d</sup>        | 83:17           | 0                   |
| 33              | TfOH (4)                               | Me <sub>3</sub> Al (1), EG (0.5)                         | rt         | 18       | <b>3aa</b>  | 59 <sup>d</sup>        | 83:17           | 0                   |
| 34              | TfOH (4)                               | (Me <sub>2</sub> Al) <sub>2</sub> NTf (0.5)              | rt         | 18       | <b>3aa</b>  | 61 <sup>d</sup>        | 84:16           | 0                   |
| 35              | TfOH (4)                               | (Me <sub>2</sub> AlO) <sub>2</sub> SO <sub>2</sub> (0.5) | rt         | 2        | <b>3aa</b>  | 66 <sup>d</sup>        | 86:14           | 0                   |
| 36              | TfOH (3)                               | (Me <sub>2</sub> AlO) <sub>2</sub> SO <sub>2</sub> (0.5) | rt         | 2        | <b>3aa</b>  | 63 <sup>d</sup>        | 92: 8           | 0                   |
| 37              | FeCl <sub>3</sub> (1.5)                |                                                          | rt         | 18       | <b>6aa</b>  | 23                     | nd <sup>c</sup> | 46                  |
| 38              | FeCl <sub>3</sub> (1.5)                | TMSCl (1.5)                                              | rt         | 18       | <b>6aa</b>  | 25                     | nd <sup>c</sup> | 0                   |
| 39              | FeCl <sub>3</sub> (1)                  | TMSCl (1)                                                | rt         | 18       | <b>6aa</b>  | 60 <sup>d</sup>        | 78:22           | 0                   |
| 40              | FeCl <sub>3</sub> (0.2)                | TMSCl (1.5)                                              | rt         | 18       | <b>6aa</b>  | 21                     | nd <sup>c</sup> | 76                  |
| 41              | I <sub>2</sub> (1.5)                   |                                                          | rt         | 18       | <b>10aa</b> | 0 <sup>b</sup>         | -               | 0                   |
| 42              | TMSCl (1)                              | NaI (1) /MeCN                                            | rt         | 18       | <b>10aa</b> | trace                  | nd <sup>c</sup> | 88                  |
| 43              | TMSCl (3)                              | NaI (3) /MeCN                                            | rt         | 18       | <b>10aa</b> | 0 <sup>b</sup>         | -               | 0                   |

TBA = tetrabutylammonium. DMPU = *N,N*-dimethylpropyleneurea. Py = pyridine. TMS = Me<sub>3</sub>Si. EG = ethylene glycol.

<sup>a</sup> Values were determined by <sup>1</sup>H NMR analysis. <sup>b</sup> Complex mixture. <sup>c</sup> Not determined. <sup>d</sup> Isolated yields. <sup>e</sup> Neat condition.

<sup>f</sup> Solvent: 1,2-dichloroethane. <sup>g</sup> Solvent: Et<sub>2</sub>O. <sup>h</sup> These metal triflates was practically insoluble in CH<sub>2</sub>Cl<sub>2</sub> even in the presence of TfOH.

## Alkyne Aza-Prins Cyclization of **1a** with Formaldehyde

Under the conditions **A** using TfOH (3 eq.) with (Me<sub>2</sub>AlO)<sub>2</sub>SO<sub>2</sub> (0.5 eq.) and under conditions **B** solely using TfOH (2 eq.), the reactions of 3,5-diynyl tosylamide **1a** with paraformaldehyde (10 eq.) were examined (Scheme S1). Consequently, the desired products were obtained as a mixture of geometric isomers in 26% (E:Z = 61:39) and 39% (E:Z = 55:45) yields, respectively. Similar to the reactions of other aldehydes (entries 1-9, Table 2 in the text), the conditions **A** showed higher *E*-selectivities than the conditions **B**. However, compared with the stereoselectivities of 2-substituted pyrrolidines **3aa-3am**, the *E*-selectivities of **3an** under the both conditions **A** and **B** were reduced. The decrease in the *E*-selectivities is in accord with the results of DFT calculations (Figure 1 in the text and Figure S1 in ESI).

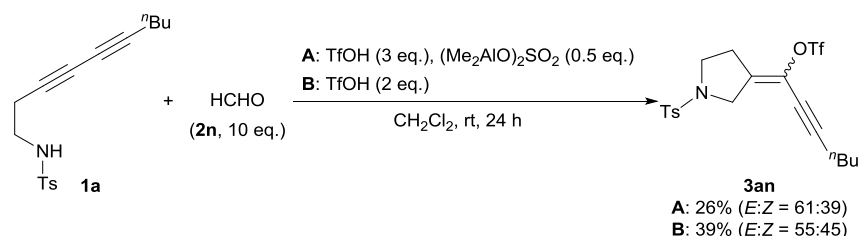

Scheme S1. Alkyne aza-Prins cyclization of **1a** with formaldehyde.

## Comments on Reactions with Aliphatic Aldehydes under the Conditions A

In the reactions of 3,5-diynyl tosylamides **1a** with aliphatic aldehyde **2k** or **2l**, starting material **1a** were recovered in 67% and 68%, respectively, along with complex mixture (Scheme S2). Under the conditions **A**, proton (TfOH) concentration would be lower than that under conditions **C** (TfOH: 3 eq.) due to the generation of complexes with (Me<sub>2</sub>AlO)<sub>2</sub>SO<sub>2</sub> and thus aliphatic iminium ions having  $\alpha$ -hydrogen would be easily converted to enamines (or the regeneration of iminium ions from enamines would be slow). Therefore, remaining in the enamine intermediates and/or the consequent side reaction such as aldol reaction may not afford the desired products **3ak** and **3al**. On the other hand, in the case of CyCHO (**2m**), **3am** was obtained in low yield likely because the ring strain and/or the steric hindrance of methylenecyclohexane structure in the enamines somewhat inhibited the formation of enamine and/or side reactions.

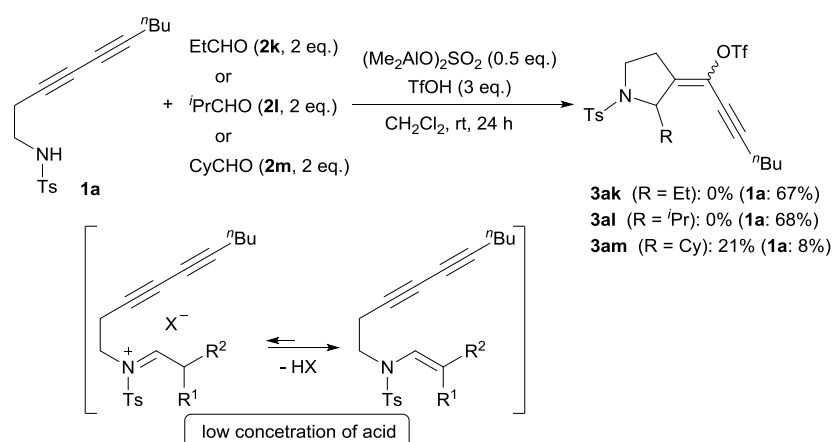

Scheme S2. Reactions of **1a** with aliphatic aldehydes **2k-2m** under the conditions **A**.

## Determination of Stereochemistries of Products

The stereochemistry of pyrrolidine *E*-**3ag** and structure of tricyclic compound **7** were confirmed by single crystal X-ray analysis (Figures S1 and S2). Furthermore, the stereochemistries of the other 2-aryl pyrrolidines **3aa-3af**, **3ah-3ai**, **4aa** and **6aa** were determined by comparison with chemical shifts of alkyne carbons of their *E*- and *Z*-isomers (Table S2). As shown in Figure S1, alkyne carbon at terminus side (hereinafter, such carbons are called " $C^\alpha$ ") in *E*-**3ag** is located near the aromatic ring at 2-position of pyrrolidine. Therefore, compared with the chemical shift of  $C^\alpha$  of *Z*-**3ag**, the significant downfield shift of  $C^\alpha$  of *E*-**3ag**, which likely caused by the magnetic anisotropy effect based on ring current of the aromatic ring, was observed ( $\Delta C^\alpha_{E-Z} = 0.7$  ppm, Table S2). In addition to the chemical shift of  $C^\alpha$ , that of another alkyne carbon  $C^\beta$  of *E*-**3ag** shifted slightly downfield ( $\Delta C^\beta_{E-Z} = 0.3$  ppm). The similar observations were showed in the spectra of the other pyrrolidines **3aa-3af**, **3ah-3ai**, **4aa** and **6aa**. Thus, compared with the chemical shift of  $C^\alpha$  and  $C^\beta$  of their minor isomers, those of  $C^\alpha$  of their major isomers shifted significantly downfield ( $\Delta C^\alpha_{E-Z} = 0.8$  to 1.2 ppm) and those of  $C^\beta$  of some major isomers shifted downfield ( $\Delta C^\beta_{E-Z} = -0.1$  to 0.2 ppm). Hence, their major isomers were determined as *E*-isomers.

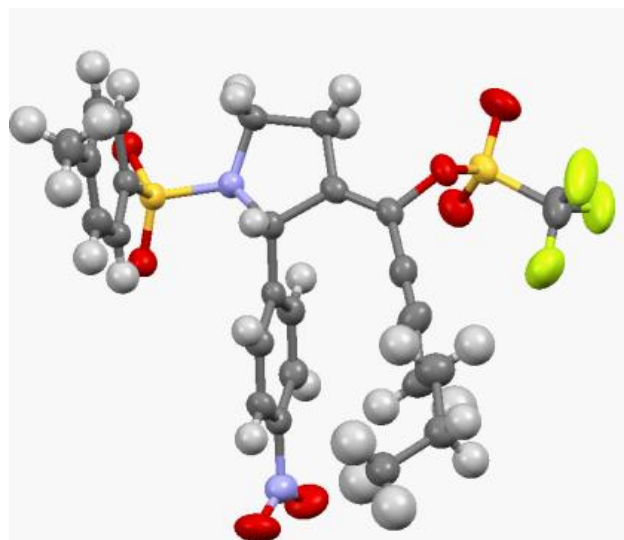

Figure S1. X-ray structure of *E*-**3ag**.

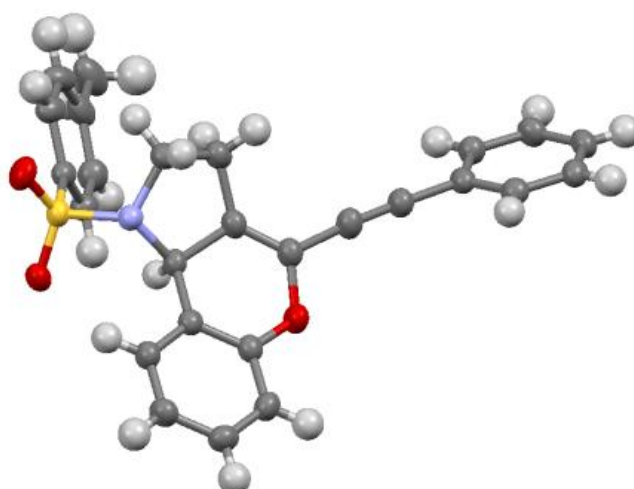

Figure S2. X-ray structure of **7**.

Table S2. Chemical Shifts of  $C^\alpha$  and  $C^\beta$  of products **3aa-ai**, **4aa** and **6aa**.

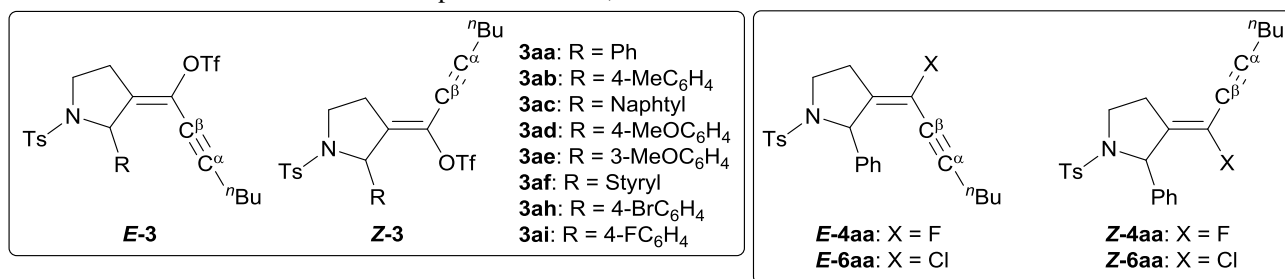

| <i>E</i> - <b>3</b>   | $\delta_C^\alpha$ ppm | $\delta_C^\beta$ ppm | <i>Z</i> - <b>3</b>   | $\delta_C^\alpha$ ppm | $\delta_C^\beta$ ppm | $\Delta C^\alpha_{E-Z}$ ppm | $\Delta C^\beta_{E-Z}$ ppm |
|-----------------------|-----------------------|----------------------|-----------------------|-----------------------|----------------------|-----------------------------|----------------------------|
| <i>E</i> - <b>3ag</b> | 102.7                 | 70.9                 | <i>Z</i> - <b>3ag</b> | 102.0                 | 70.6                 | 0.7                         | 0.3                        |
| <i>E</i> - <b>3aa</b> | 101.8                 | 71.0                 | <i>Z</i> - <b>3aa</b> | 101.0                 | 70.9                 | 0.8                         | 0.1                        |
| <i>E</i> - <b>3ab</b> | 101.7                 | 71.1                 | <i>Z</i> - <b>3ab</b> | 100.8                 | 71.0                 | 0.9                         | 0.1                        |
| <i>E</i> - <b>3ac</b> | 102.0                 | 71.0                 | <i>Z</i> - <b>3ac</b> | 101.1                 | 71.0                 | 0.9                         | 0                          |
| <i>E</i> - <b>3ad</b> | 101.7                 | 71.0                 | <i>Z</i> - <b>3ad</b> | 100.8                 | 71.0                 | 0.9                         | 0                          |
| <i>E</i> - <b>3ae</b> | 101.7                 | 71.1                 | <i>Z</i> - <b>3ae</b> | 101.0                 | 70.9                 | 0.9                         | 0.2                        |
| <i>E</i> - <b>3af</b> | 101.9                 | 70.9                 | <i>Z</i> - <b>3af</b> | 100.9                 | 71.0                 | 1.0                         | -0.1                       |
| <i>E</i> - <b>3ah</b> | 102.2                 | 70.9                 | <i>Z</i> - <b>3ah</b> | 101.3                 | 70.8                 | 0.9                         | 0.1                        |
| <i>E</i> - <b>3ai</b> | 102.0                 | 70.9                 | <i>Z</i> - <b>3ai</b> | 101.2                 | 70.8                 | 0.8                         | 0.1                        |
| <i>E</i> - <b>4aa</b> | 99.0                  | 71.1                 | <i>Z</i> - <b>4aa</b> | 97.8                  | 70.9                 | 1.2                         | 0.2                        |
| <i>E</i> - <b>6aa</b> | 97.5                  | 76.1                 | <i>Z</i> - <b>6aa</b> | 96.4                  | 76.0                 | 1.1                         | 0.1                        |

On the other hand, the stereochemistries of the 2-alkyl pyrrolidines **3ak-3am** (Figures S3-S6) and the ring-opening products **5ba-5ca** (Figures S7-S9) were determined by NOESY spectra. As shown in Figure S3, NOE correlations between H<sup>b</sup> and H<sup>c</sup> in spectra of *E-3ak* (Figure S4), those between H<sup>b</sup> and H<sup>c</sup> in spectra of *E-3al* (Figure S5), or those between H<sup>b</sup> and H<sup>d</sup> and between H<sup>c</sup> and H<sup>d</sup> in spectra of *E-3am* (Figure S6) were observed. Thus, those products were determined as *E*-isomers. Furthermore, as shown in Figure S7, NOE correlations between H<sup>c</sup> and H<sup>d</sup> and between H<sup>e</sup> and H<sup>e</sup> in spectra of **5ba** (Figure S8) or those between H<sup>a</sup> and H<sup>a</sup> and between H<sup>a</sup> and H<sup>d</sup> in spectra of **5ca** (Figure S9) were observed. Hence, those products were determined as *E*-isomers.

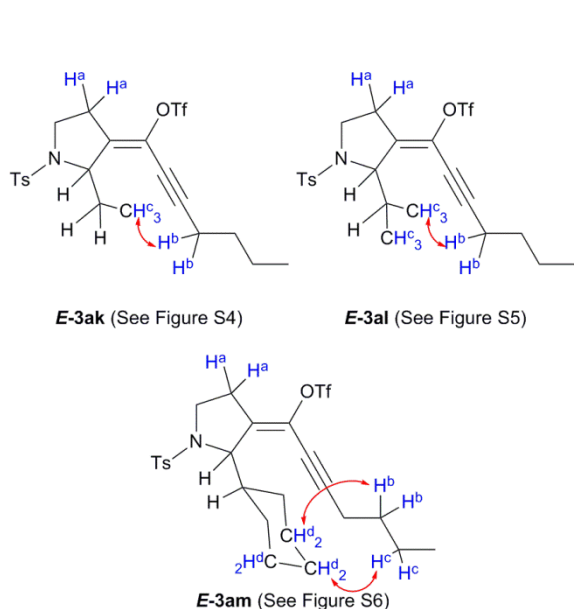

**Figure S3.** Summarization of NOESY correlations of *E-3ak*, *E-3al* and *E-3am*.

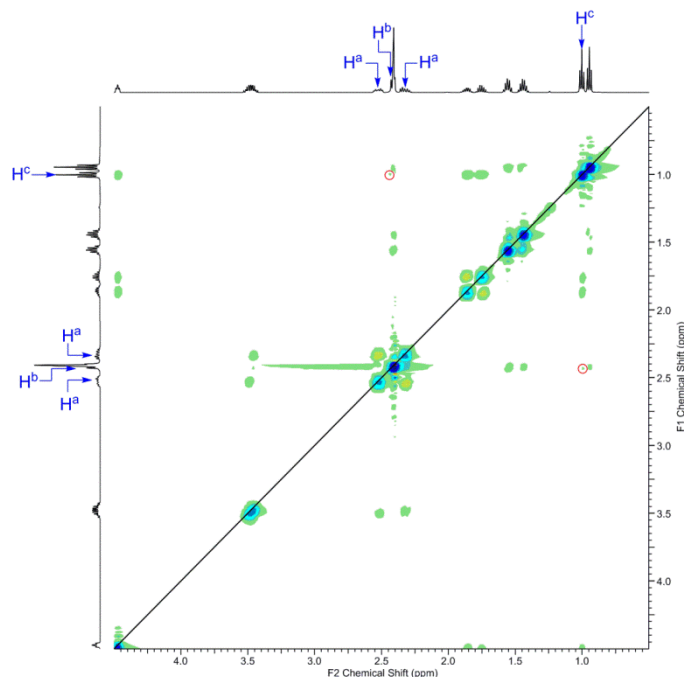

**Figure S4.** NOESY spectrum of *E-3ak*.

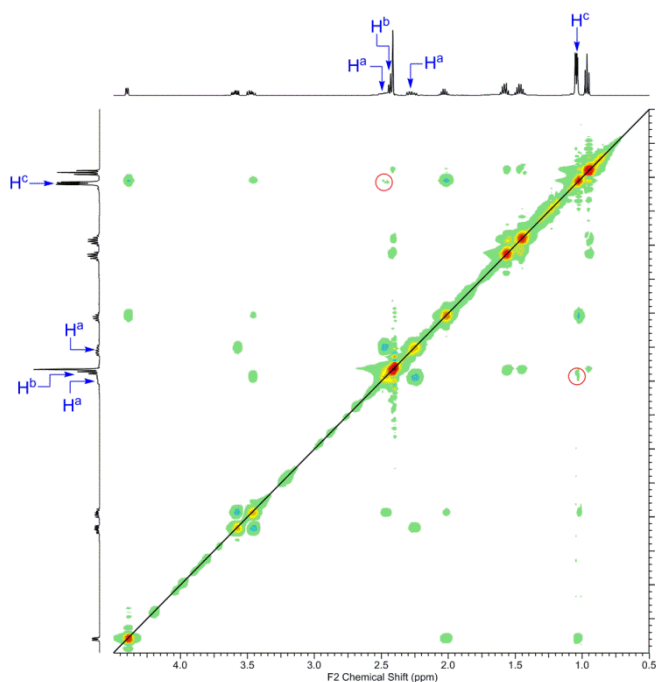

**Figure S5.** NOESY spectrum of *E-3al*.

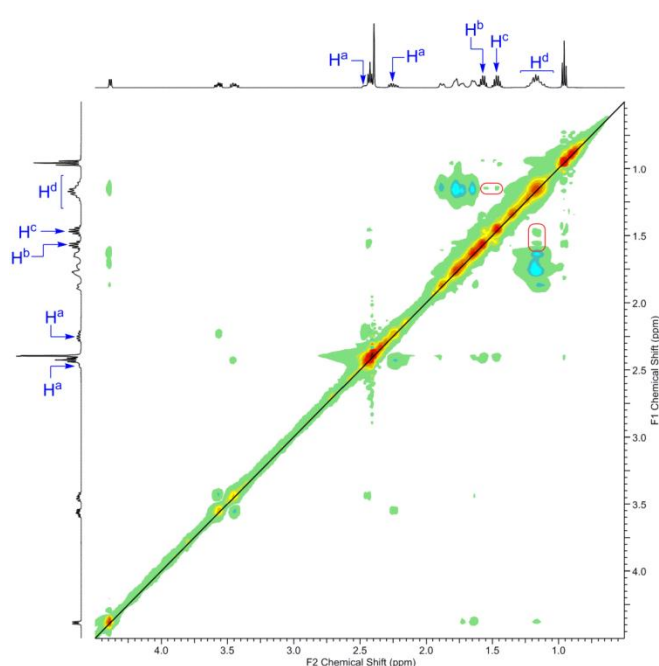

**Figure S6.** NOESY spectrum of *E-3am*.

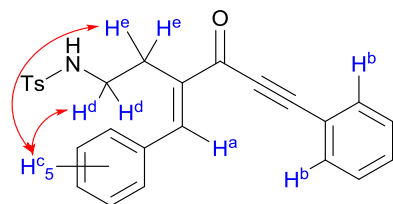

**5ba** (See Figure S8)

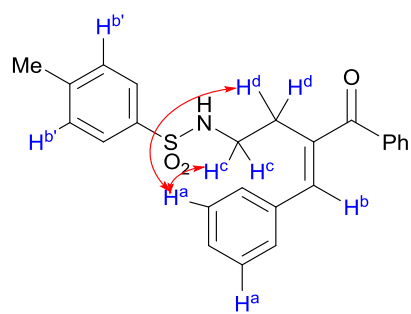

**5ca** (See Figure S9)

**Figure S7.** Summarization of NOESY correlations of **5ba** and **5ca**.

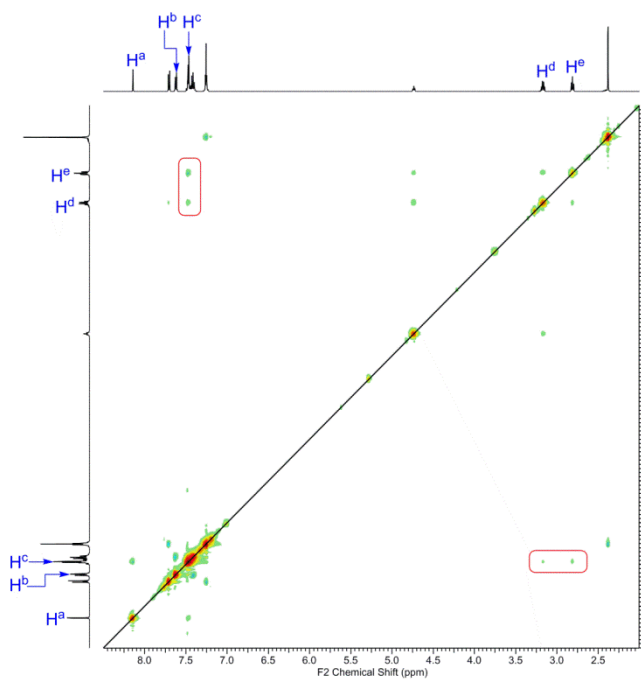

**Figure S8.** NOESY spectrum of **5ba**.

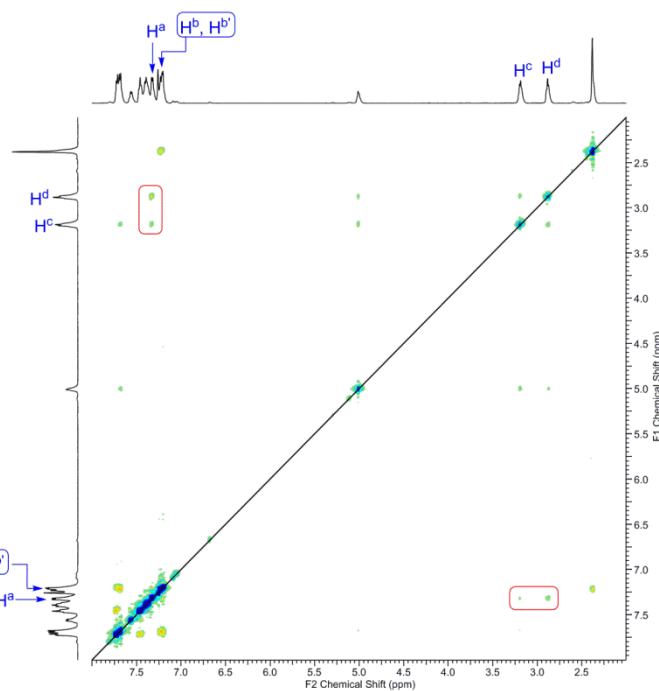

**Figure S9.** NOESY spectrum of **5ca**.

## DFT Calculations on 6-endo and 5-exo Cyclization Pathways

All calculations were performed with the Gaussian 09 package.<sup>1</sup> All local minima and transition states were optimized at B3LYP/6-31+G\* with the polarized continuum model (PCM, CH<sub>2</sub>Cl<sub>2</sub>). Frequency calculation were carried out to characterize the stationary points and to estimate Gibbs free energies.

We explored 6-endo and 5-exo cyclization pathways in the present aza-Prins cyclization (Figure S10). Though 6-endo product **PDc** is 1.8 kcal/mol more stable than 5-exo product **PDa\_E**, the concerted 6-endo process directly affording **PDc** is overwhelmingly higher energy level than the stepwise 5-exo process via formation of the cationic cyclized intermediate.

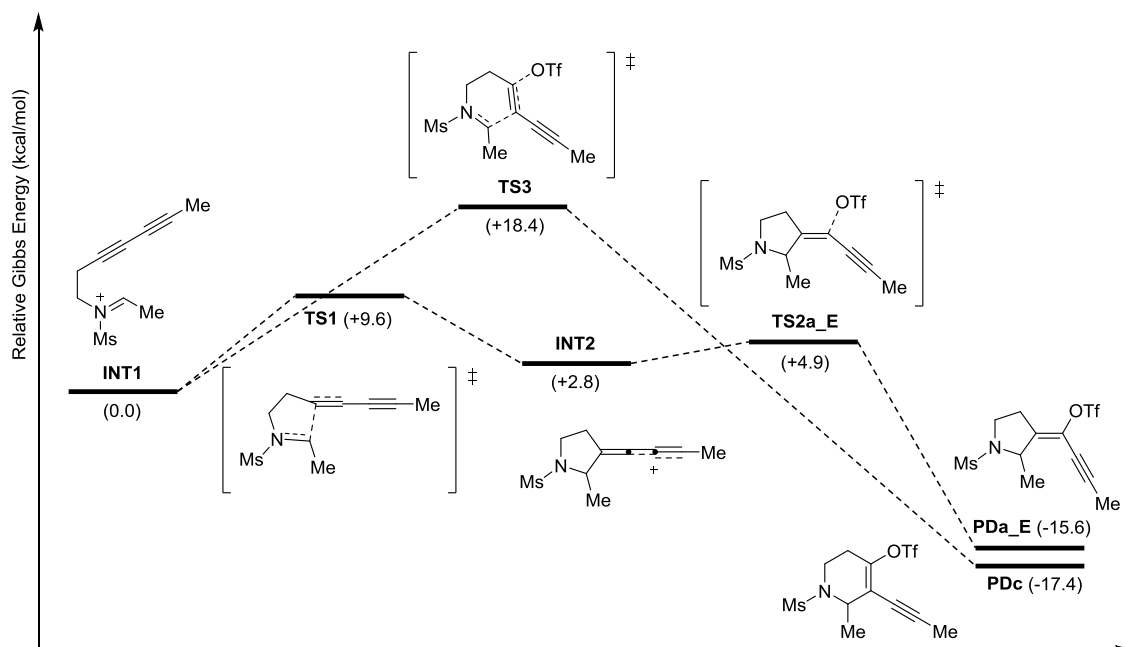

**Figure S10.** Gibbs free energy profile (in kcal/mol) of 6-endo and 5-exo cyclization pathways.

<sup>1</sup> Gaussian 09, Revision D.01, Frisch, M. J.; Trucks, G. W.; Schlegel, H. B.; Scuseria, G. E.; Robb, M. A.; Cheeseman, J. R.; Scalmani, G.; Barone, V.; Mennucci, B.; Petersson, G. A.; Nakatsuji, H.; Caricato, M.; Li, X.; Hratchian, H. P.; Izmaylov, A. F.; Bloino, J.; Zheng, G.; Sonnenberg, J. L.; Hada, M.; Ehara, M.; Toyota, K.; Fukuda, R.; Hasegawa, J.; Ishida, M.; Nakajima, T.; Honda, Y.; Kitao, O.; Nakai, H.; Vreven, T.; Montgomery, J. A. Jr.; Peralta, J. E.; Ogliaro, F.; Bearpark, M.; Heyd, J. J.; Brothers, E.; Kudin, K. N.; Staroverov, V. N.; Keith, T.; Kobayashi, R.; Normand, J.; Raghavachari, K.; Rendell, A.; Burant, J. C.; Iyengar, S. S.; Tomasi, J.; Cossi, M.; Rega, N.; Millam, J. M.; Klene, M.; Knox, J. E.; Cross, J. B.; Bakken, V.; Adamo, C.; Jaramillo, J.; Gomperts, R.; Stratmann, R. E.; Yazyev, O.; Austin, A. J.; Cammi, R.; Pomelli, C.; Ochterski, J. W.; Martin, R. L.; Morokuma, K.; Zakrzewski, V. G.; Voth, G. A.; Salvador, P.; Dannenberg, J. J.; Dapprich, S.; Daniels, A. D.; Farkas, O.; Foresman, J. B.; Ortiz, J. V.; Cioslowski, J.; and Fox, D. J. Gaussian, Inc., Wallingford CT, 2013.



### DFT Calculations of Models Derived from Benzaldehyde instead of Acetaldehyde

Focusing on the *E/Z*-selectivity of TfO<sup>-</sup> addition, **TS2a\_E** is 0.7 kcal/mol more stable than **TS2a\_Z** (Figure 1 in the text) in qualitatively good agreement with the experimental results. Therefore, the calculations were carried out using models derived from benzaldehyde instead of acetaldehyde (Figure S11). As a result, the energy difference between **TS2'a\_Z** and **TS2'a\_E** increases to 0.9 kcal/mol. The *E*-selectivity is due to the enhancement of strain energy of carbocation moiety in **TS2'a\_Z** (1.8 kcal/mol more compared with strain energy of **TS-2'a\_E**, 2.5° less compared with cation-centered angle in **TS-2'a\_E**) caused by the mitigation of steric hindrance between 2-phenyl group and TfO<sup>-</sup>.

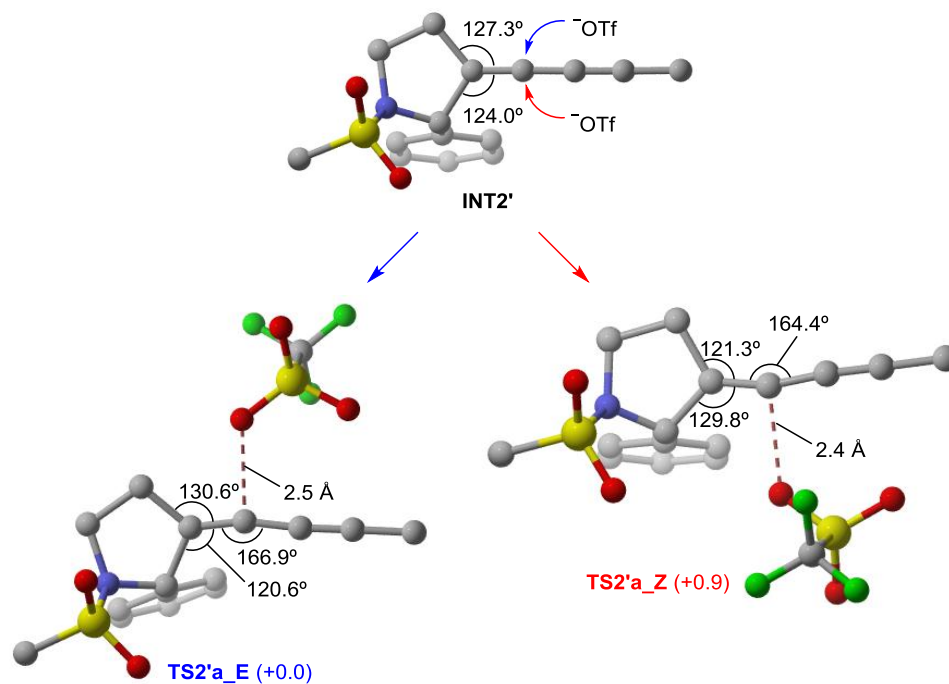

**Figure S11.** 3D structures of **INT2'**, **TS2'a\_E** and **TS2'a\_Z**.

## General Information

All reactions were carried out under an argon atmosphere. *N*-Homopropargyl tosylamide **1c** and **1d** were prepared by the method reported in the literatures.<sup>2</sup> Triflic acid (TfOH), Me<sub>3</sub>Al, bis(trimethylsilyl)sulfate [(TMSO)<sub>2</sub>SO<sub>2</sub>] and aldehydes **2a-n** are commercially available. Dichloromethane were purchased as the “anhydrous” and used without further purification. For the TLC analysis, Merck precoated TLC plates (silica gel 60 F254) were used. Column chromatography was performed on silica gel 60N (63-200 μm, neutral, Kanto Kagaku Co., Ltd.). Medium-pressure liquid chromatography (MPLC) was carried out on YAMAZEN W-Prep 2XY. <sup>1</sup>H and <sup>13</sup>C NMR spectra were measured at 500 (or 300) and 125 (or 75) MHz in CDCl<sub>3</sub>, and the chemical shifts are given in ppm using CHCl<sub>3</sub> (7.26 ppm) in CDCl<sub>3</sub> for <sup>1</sup>H NMR and CDCl<sub>3</sub> (77.0 ppm) for <sup>13</sup>C NMR as an internal standard, respectively. Splitting patterns of an apparent multiplet associated with an averaged coupling constant were designed as s (singlet), d (doublet), t (triplet), q (quartet), m (multiplet), and br (broadened). IR spectra were obtained on a JASCO FT/IR-6200. Mass spectra and HRMS were recorded on a JEOL MStation MS700 (double-focusing magnetic sector) by FAB methods.

## Synthesis and Characterization of 3,5-Diynyl Tosylamides **1a** and **1b**

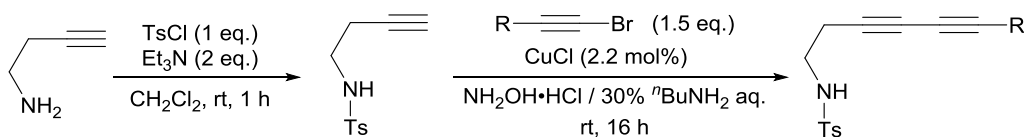

To a solution of 3-butyn-1-amine (0.8 mL, 10 mmol) and triethylamine (2.8 mL, 20 mmol) in CH<sub>2</sub>Cl<sub>2</sub> (30 mL) was added *p*-toluenesulfonyl chloride (1.9 g, 10 mmol) at 0 °C. After being stirred at room temperature for 1 h, the reaction mixture was quenched with H<sub>2</sub>O and extracted with CH<sub>2</sub>Cl<sub>2</sub>. The organic layer was dried over MgSO<sub>4</sub> and concentrated in vacuo to dryness. The residue was purified by silica gel column chromatography (hexane:AcOEt = 3:1) to give *N*-3-butyn-1-yl-4-methyl-benzenesulfonamide<sup>3</sup> (2.15 g, 96%).

CuCl (6.5 mg, 66 μmol) was added to a 30% <sup>n</sup>BuNH<sub>2</sub> aqueous solution (9 mL) at room temperature. And then, until the resulting blue solution became colorless, hydroxylamine hydrochloride were added. After the solution was cooled to 0 °C, *N*-3-butyn-1-yl-4-methyl-benzenesulfonamide (670 mg, 3 mmol) was added, thereby forming in a yellow acetylide suspension. Subsequently, 1-bromohex-1-yne<sup>4</sup> (725 mg, 4.5 mmol) or (bromoethynyl)benzene<sup>3</sup> (815 mg, 4.5 mmol) was added at same temperature. After being stirred at room temperature for 16 h, the reaction mixture was extracted with Et<sub>2</sub>O. The organic layer was washed with sat. NH<sub>4</sub>Cl, dried over MgSO<sub>4</sub> and concentrated in vacuo to dryness. The residue was purified by silica gel column chromatography (hexane:AcOEt = 3:1) to give **1a** (600 mg, 67%) or **1b** (762 mg, 80%).

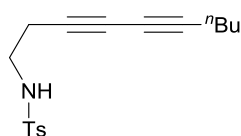

***N*-(Deca-3,5-diyn-1-yl)-4-methylbenzenesulfonamide (1a):** *R*<sub>f</sub> = 0.37 (hexane:AcOEt = 3:1). White solid. MP: 45-46°C. IR (KBr)  $\nu$  cm<sup>-1</sup>; 2259, 1317, 1153. <sup>1</sup>H NMR (500 MHz)  $\delta$  ppm; 7.75 (d, *J* = 8.0 Hz, 2H), 7.32 (d, *J* = 8.0 Hz, 2H), 4.70 (br.t, *J* = 6.6 Hz, 1H), 3.10 (q, *J* = 6.6 Hz, 2H), 2.43 (s, 3H), 2.41 (t, *J* = 6.3 Hz, 3H), 2.26 (t, *J* = 6.8 Hz, 2H), 1.55-1.47 (m, 2H), 1.46-1.38 (m, 2H), 0.91 (t, *J* = 7.4 Hz, 3H). <sup>13</sup>C NMR (125 MHz)  $\delta$  ppm; 143.6, 136.8, 129.7, 127.0, 78.8, 72.6, 67.6, 64.6, 41.5, 30.1, 21.8, 21.5, 20.6, 18.8, 13.4. FAB-LM *m/z*: 304 [M+H]. FAB-HM Calcd for C<sub>17</sub>H<sub>22</sub>NO<sub>2</sub>S [M+H]: 304.1371; found: 304.1407.

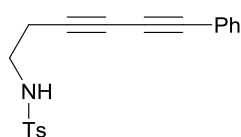

**4-Methyl-*N*-(6-phenylhexa-3,5-diyn-1-yl)benzenesulfonamide (1b):** *R*<sub>f</sub> = 0.26 (hexane:AcOEt = 3:1). Colorless solid. MP: 106-107 °C. IR (KBr)  $\nu$  cm<sup>-1</sup>; 2243, 1316, 1153. <sup>1</sup>H NMR (500 MHz)  $\delta$  ppm; 7.78 (d, *J* = 8.0 Hz, 2H), 7.49-7.44 (m, 2H), 7.38-7.33 (m, 1H), 7.33-7.28 (m, 2H), 7.32 (d, *J* = 8.0 Hz, 2H), 5.11 (t, *J* = 6.3 Hz, 1H), 3.15 (td, *J* = 6.6, 6.3 Hz, 2H), 2.53 (t, *J* = 6.6 Hz, 2H), 2.41 (s, 3H). <sup>13</sup>C NMR (125 MHz)  $\delta$  ppm; 143.6, 136.7, 132.5, 129.8, 129.1, 128.4, 127.0, 121.4, 80.0, 75.7, 73.6, 67.2, 41.4, 21.5, 21.0. FAB-LM *m/z*: 324 [M+H]. FAB-HM Calcd for C<sub>19</sub>H<sub>18</sub>NO<sub>2</sub>S [M+H]: 324.1058; found: 324.1026.

<sup>2</sup> Y. Yin, W. Ma, Z. Chai and G. Zhao, *J. Org. Chem.*, **2007**, *72*, 5731.

<sup>3</sup> H. Park, H.-K. Lee and T.-L. Choi, *J. Am. Chem. Soc.*, **2013**, *135*, 10769.

<sup>4</sup> J. P. Marino and H. N. Nguyen *J. Org. Chem.*, **2002**, *67*, 6841.

## Synthesis and Characterization of TfO-Substituted Pyrrolidines **3**, Ring-Opening Products **5ba**, **5ca** and Tricyclic Compound **7**

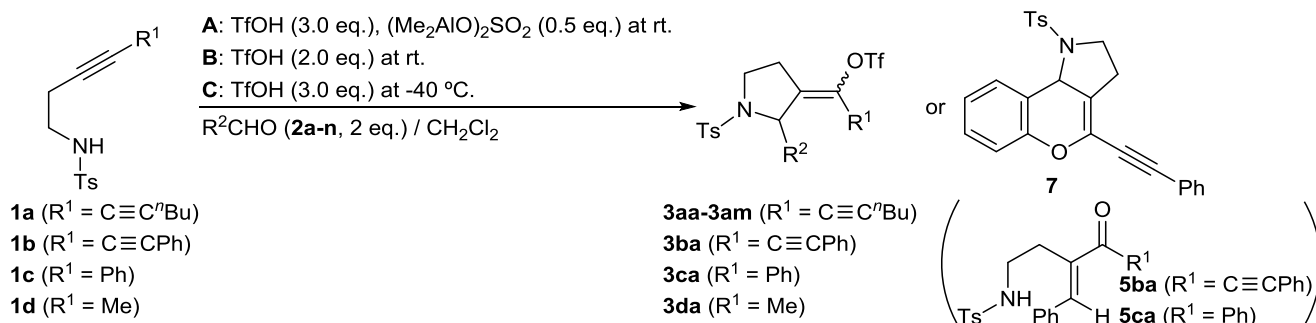

**Method A:** To a solution of  $(\text{Me}_2\text{AlO})_2\text{SO}_2$ , which was prepared by the treatment of  $(\text{TMSO})_2\text{SO}_2$  (48.5 mg, 0.20 mmol) in  $\text{CH}_2\text{Cl}_2$  (2.5 mL) with  $\text{Me}_3\text{Al}$  (15% solution in hexane, 0.3 mL, 0.4 mmol) at room temperature for 30 min,<sup>5</sup> was added TfOH (105.9  $\mu\text{L}$ , 1.2 mmol) at  $0^\circ\text{C}$ . After being stirred at room temperature for 30 min, aldehyde **2** (0.80 mmol) and homopropargyl amide **1** (**1a**, 121.4 mg, 0.40 mmol; **1b**, 129.4 mg, 0.40 mmol; **1c**, 119.8 mg, 0.4 mmol; or **1d**, 94.9 mg, 0.4 mmol) were added in turn and then the reaction mixture was stirred at room temperature until amide **1** was consumed completely (by TLC analysis). The reaction mixture was quenched with sat.  $\text{NH}_4\text{Cl}$  and extracted with AcOEt. The organic layer was dried over  $\text{MgSO}_4$  and concentrated in vacuo to dryness. The residue was purified by MPLC to give **3aa-3aj**, **3am**, **3an**, **3ba** (and **5ba**), **3ca** (and **5ca**) or **3da**.

**Method B:** To a solution of aldehyde **2a-f** or **2n** (0.80 mmol) and homopropargyl amide **1** (**1a**, 121.4 mg, 0.40 mmol; **1b**, 129.4 mg, 0.40 mmol; **1c**, 119.8 mg, 0.4 mmol; or **1d**, 94.9 mg, 0.4 mmol) in  $\text{CH}_2\text{Cl}_2$  (2.5 mL) was added TfOH (70.6  $\mu\text{L}$ , 0.8 mmol) at  $0^\circ\text{C}$ . After being stirred at room temperature until amide **1** was consumed completely (by TLC analysis), the reaction mixture was quenched with sat.  $\text{NaHCO}_3$  and extracted with AcOEt. The organic layer was dried over  $\text{MgSO}_4$  and concentrated in vacuo to dryness. The residue was purified by MPLC to give **3aa-3af**, **3an**, **3ba** (and **5ba**), **3ca** (and **5ca**), **3da** or **7**.

**Method C:** To a solution of aldehyde **2g-m** (0.80 mmol) and 3,5-diynyl amide **1a** (121.4 mg, 0.40 mmol) in  $\text{CH}_2\text{Cl}_2$  (2.5 mL) was added TfOH (105.9  $\mu\text{L}$ , 1.2 mmol) at  $-40^\circ\text{C}$ . After being stirred at same temperature until amide **1a** was consumed completely (by TLC analysis), the reaction mixture was quenched with sat.  $\text{NaHCO}_3$  and extracted with AcOEt. The organic layer was dried over  $\text{MgSO}_4$  and concentrated in vacuo to dryness. The residue was purified by MPLC to give **3ag-3am**.

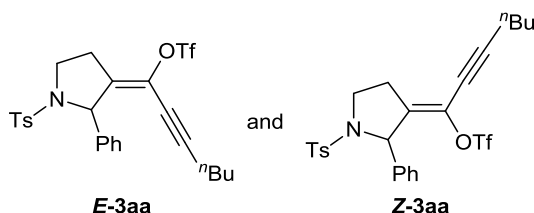

### (*E*)-1-(2-Phenyl-1-tosylpyrrolidin-3-ylidene)hept-2-yn-1-yl trifluoromethanesulfonate (**E-3aa**)

**Method A** (2 h): 125.6 mg (58%). **Method B** (2 h): 101.8 mg (47%).  $R_f = 0.40$  (hexane:AcOEt = 3:1). Yellow oil. IR (neat)  $\nu$   $\text{cm}^{-1}$ : 2225, 1599, 1420, 1351, 1214, 1164, 1093.  $^1\text{H}$  NMR (500 MHz)  $\delta$  ppm; 7.58 (d,  $J = 8.0$  Hz, 2H), 7.37-7.33 (m, 2H), 7.32-7.28 (m, 3H), 7.24 (dd,  $J = 8.0$  Hz, 2H), 5.61 (s, 1H), 3.67-3.60 (m, 1H), 3.54-3.46 (m, 1H), 2.73-2.64 (m, 1H), 2.63-2.54 (m, 1H), 2.40 (s, 3H), 2.30 (t,  $J = 6.8$  Hz, 2H), 1.47-1.38 (m, 2H), 1.35-1.24 (m, 2H), 0.86 (t,  $J = 7.2$  Hz, 3H).  $^{13}\text{C}$  NMR (125 MHz)  $\delta$  ppm; 144.0, 141.3, 137.7, 134.9, 129.7, 128.5, 128.1, 127.2, 126.5, 118.1 (q,  $J_{\text{C-F}} = 320.3$  Hz), 101.8, 71.0, 65.5, 46.4, 29.7, 28.7, 21.7, 21.4, 18.9, 13.4 (note that two carbon peaks overlap with each other).  $^{19}\text{F}$  NMR (282 MHz)  $\delta$  ppm; -75.1. FAB-LM  $m/z$ : 542 [M+H]. FAB-HM Calcd for  $\text{C}_{25}\text{H}_{27}\text{F}_3\text{NO}_5\text{S}_2$  [M+H]: 542.1283; found: 542.1298.

### (*Z*)-1-(2-Phenyl-1-tosylpyrrolidin-3-ylidene)hept-2-yn-1-yl trifluoromethanesulfonate (**Z-3aa**)

**Method A** (2 h): 10.9 mg (5%). **Method B** (2 h): 34.7 mg (16%).  $R_f = 0.23$  (hexane:AcOEt = 3:1). Yellow oil. IR (neat)  $\nu$   $\text{cm}^{-1}$ : 2224, 1599, 1420, 1352, 1222, 1163, 1093.  $^1\text{H}$  NMR (500 MHz)  $\delta$  ppm; 7.58 (d,  $J = 8.1$  Hz, 2H), 7.34-27 (m, 5H), 7.25 (d,  $J = 8.1$  Hz, 2H), 5.56 (d,  $J = 1.8$  Hz, 1H), 3.72-3.63 (m, 1H), 3.55-3.47 (m, 1H), 2.89-2.78 (m, 1H), 2.68-2.59 (m, 1H), 2.40 (s, 3H), 2.33 (t,  $J = 7.2$  Hz, 2H), 1.53-1.44 (m, 2H), 1.41-1.32 (m, 2H), 0.88 (t,  $J = 7.5$  Hz, 3H).  $^{13}\text{C}$  NMR (125 MHz)  $\delta$  (ppm); 143.8, 140.7, 138.5, 134.3, 129.7, 128.6, 128.2, 127.5, 127.4, 124.4, 118.1 (q,  $J_{\text{C-F}} = 320.3$  Hz), 101.0, 70.9, 64.7, 46.8, 29.8, 29.7, 21.8, 21.5, 19.0, 13.4.  $^{19}\text{F}$  NMR (282 MHz)  $\delta$  ppm; -74.9. FAB-LM  $m/z$ : 542 [M+H]. FAB-HM Calcd for  $\text{C}_{25}\text{H}_{27}\text{F}_3\text{NO}_5\text{S}_2$  [M+H]: 542.1283; found: 542.1291.

<sup>5</sup> H. Hanawa, N. Maekawa and K. Maruoka, *Tetrahedron Lett.*, **1999**, *40*, 8379.

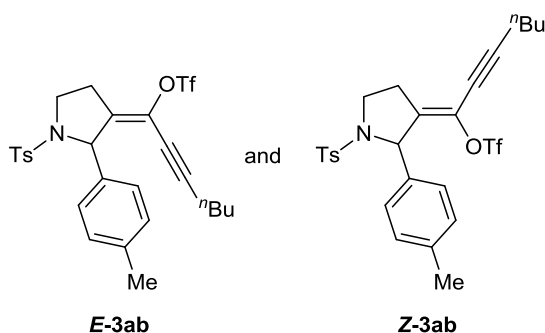

**(E)-1-(2-(p-Tolyl)-1-tosylpyrrolidin-3-ylidene)hept-2-yn-1-yl trifluoromethanesulfonate (E-3ab)**

Method **A** (4 h): 113.3 mg (51%). Method **B** (2 h): 60.0 mg (27%).  $R_f = 0.51$  (hexane:AcOEt = 3:1). White solid. MP: 50-51 °C. IR (KBr)  $\nu$   $\text{cm}^{-1}$ : 2225, 1596, 1419, 1352, 1215, 1164, 1092.  $^1\text{H}$  NMR (500 MHz)  $\delta$  ppm: 7.58 (d,  $J = 8.6$  Hz, 2H), 7.24 (d,  $J = 8.6$  Hz, 2H), 7.22 (d,  $J = 8.6$  Hz, 2H), 7.10 (d,  $J = 8.6$  Hz, 2H), 5.57 (s, 1H), 3.65-3.58 (m, 1H), 3.53-3.45 (m, 1H), 2.71-2.63 (m, 1H), 2.61-2.53 (m, 1H), 2.40 (s, 3H), 2.32 (s, 3H), 2.29 (t,  $J = 7.2$  Hz, 2H), 1.46-1.39 (m, 2H), 1.34-1.25 (m, 2H), 0.86 (t,  $J = 7.2$  Hz, 3H).  $^{13}\text{C}$  NMR (125 MHz)  $\delta$  ppm: 143.9, 141.4, 137.8, 135.0, 134.8, 129.7, 129.2, 127.2, 127.1, 126.4, 118.2 (q,  $J_{\text{C-F}} = 320.3$  Hz), 101.7, 71.1, 65.4, 46.4, 29.7, 28.7, 21.7, 21.5, 21.1, 19.0, 13.4.  $^{19}\text{F}$  NMR (282 MHz)  $\delta$  ppm: -75.2. FAB-LM  $m/z$ : 556 [M+H]. FAB-HM Calcd for  $\text{C}_{26}\text{H}_{29}\text{F}_3\text{NO}_5\text{S}_2$  [M+H]: 556.1439; found 556.1433.

**(Z)-1-[2-(p-Tolyl)-1-tosylpyrrolidin-3-ylidene]hept-2-yn-1-yl trifluoromethanesulfonate (Z-3ab)**

Method **A** (4 h): 20.0 mg (9%). Method **B** (2 h): 28.9 mg (13%).  $R_f = 0.34$  (hexane:AcOEt = 3:1). Brown oil. IR (neat)  $\nu$   $\text{cm}^{-1}$ : 2224, 1598, 1420, 1351, 1220, 1163, 1093.  $^1\text{H}$  NMR (500 MHz)  $\delta$  ppm: 7.57 (d,  $J = 8.0$  Hz, 2H), 7.24 (d,  $J = 8.0$  Hz, 2H), 7.17 (d,  $J = 8.0$  Hz, 2H), 7.09 (d,  $J = 8.0$  Hz, 2H), 5.51 (s, 1H), 3.70-3.62 (m, 1H), 3.51-3.44 (m, 1H), 2.86-2.76 (m, 1H), 2.65-2.56 (m, 1H), 2.39 (s, 3H), 2.32 (t,  $J = 6.9$  Hz, 2H), 2.31 (s, 3H), 1.51-1.43 (m, 2H), 1.40-1.30 (m, 2H), 0.87 (t,  $J = 7.4$  Hz, 3H).  $^{13}\text{C}$  NMR (125 MHz)  $\delta$  ppm: 143.7, 140.9, 138.0, 135.6, 134.3, 129.7, 129.3, 127.5, 127.2, 124.3, 118.1 (q,  $J_{\text{C-F}} = 320.3$  Hz), 100.8, 71.0, 64.5, 46.8, 29.8, 29.7, 21.8, 21.5, 21.1, 19.0, 13.4.  $^{19}\text{F}$  NMR (282 MHz)  $\delta$  ppm: -74.9. FAB-LM  $m/z$ : 556 [M+H]. FAB-HM Calcd for  $\text{C}_{26}\text{H}_{29}\text{F}_3\text{NO}_5\text{S}_2$  [M+H]: 556.1439; found 556.1449.

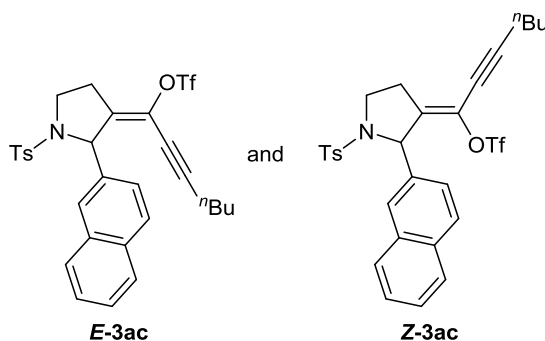

**(E)-1-[2-(Naphthalene-2-yl)-1-tosylpyrrolidin-3-ylidene]hept-2-yn-1-yl trifluoromethanesulfonate (E-3ac)**

Method **A** (4 h): 120.7 mg (51%). Method **B** (4 h): 89.9 mg (38%).  $R_f = 0.40$  (hexane:AcOEt = 3:1). Brown solid. MP: 60-62 °C. IR (KBr)  $\nu$   $\text{cm}^{-1}$ : 2223, 1596, 1420, 1353, 1224, 1166, 1093.  $^1\text{H}$  NMR (500 MHz)  $\delta$  ppm: 7.84-7.77 (m, 3H), 7.75 (s, 1H), 7.59 (d,  $J = 8.6$  Hz, 2H), 7.52-7.46 (m, 3H), 7.17 (d,  $J = 8.6$  Hz, 2H), 5.78 (s, 1H), 3.78-3.66 (1H), 3.63-3.53 (m, 1H), 2.85-2.74 (m, 1H), 2.72-2.62 (m, 1H), 2.36 (s, 3H), 2.25 (t,  $J = 7.2$  Hz, 2H), 1.40-1.30 (m, 2H), 1.26-1.16 (m, 2H), 0.77 (t,  $J = 7.4$  Hz, 3H).  $^{13}\text{C}$  NMR (125 MHz)  $\delta$  ppm: 143.9, 141.3, 135.0, 134.8, 133.0, 132.9, 129.7, 128.5, 128.1, 127.5, 127.2, 126.7, 126.6, 126.3, 126.2, 124.9, 118.2 (q,  $J_{\text{C-F}} = 320.3$  Hz), 102.0, 71.0, 65.8, 46.5, 29.6, 28.8, 21.6, 21.4, 18.9, 13.2.  $^{19}\text{F}$  NMR (282 MHz)  $\delta$  ppm: -75.1. FAB-LM  $m/z$ : 592 [M+H]. FAB-HM Calcd for  $\text{C}_{29}\text{H}_{29}\text{F}_3\text{NO}_5\text{S}_2$  [M+H]: 592.1439; found 592.1468.

**(Z)-1-[2-(Naphthalene-2-yl)-1-tosylpyrrolidin-3-ylidene]hept-2-yn-1-yl trifluoromethanesulfonate (Z-3ac)**

Method **A** (4 h): 33.1 mg (14%). Method **B** (4 h): 40.2 mg (17%).  $R_f = 0.29$  (hexane:AcOEt = 3:1). Colorless oil. IR (neat)  $\nu$   $\text{cm}^{-1}$ : 2224, 1599, 1420, 1352, 1219, 1163, 1093.  $^1\text{H}$  NMR (500 MHz)  $\delta$  ppm: 7.83-7.77 (m, 2H), 7.76 (d,  $J = 8.6$  Hz, 1H), 7.73 (s, 1H), 7.57 (d,  $J = 8.6$  Hz, 2H), 7.52-7.45 (m, 2H), 7.39 (dd,  $J = 8.6, 1.7$  Hz, 1H), 7.16 (d,  $J = 8.6$  Hz, 2H), 5.74 (s, 1H), 3.79-3.72 (m, 1H), 3.64-3.56 (m, 1H), 2.97-2.87 (m, 1H), 2.75-2.65 (m, 1H), 2.35 (d,  $J = 7.2$  Hz, 2H), 2.34 (s, 3H), 1.53-1.44 (m, 2H), 1.42-1.33 (m, 2H), 0.89 (t,  $J = 7.3$  Hz, 3H).  $^{13}\text{C}$  NMR (125 MHz)  $\delta$  ppm: 143.8, 140.6, 135.5, 134.4, 133.1, 133.0, 129.6, 128.6, 128.2, 127.5, 127.4, 126.8, 126.3, 126.2, 124.8, 124.6, 118.1 (q,  $J_{\text{C-F}} = 320.3$  Hz), 101.1, 71.0, 64.9, 46.9, 29.8, 21.8, 21.4, 19.0, 13.4 (note that two carbon peaks overlap with each other).  $^{19}\text{F}$  NMR (282 MHz)  $\delta$  ppm: -74.9. FAB-LM  $m/z$ : 592 [M+H]. FAB-HM Calcd for  $\text{C}_{29}\text{H}_{29}\text{F}_3\text{NO}_5\text{S}_2$  [M+H]: 592.1439; found 592.1463.

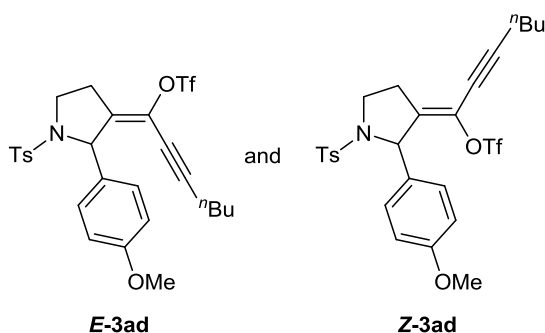

**(E)-1-[2-(4-Methoxyphenyl)-1-tosylpyrrolidin-3-ylidene]hept-2-yn-1-yl trifluoromethanesulfonate (E-3ad)**

Method **A** (24 h): 96.0 mg (42%). Method **B** (24 h): 89.2 mg (39%).  $R_f = 0.49$  (hexane:AcOEt = 3:1). White solid. MP: 79-80 °C. IR (KBr)  $\nu$   $\text{cm}^{-1}$ : 2220, 1597, 1419, 1350, 1212, 1163, 1095.  $^1\text{H}$  NMR (500 MHz)  $\delta$  ppm; 7.58 (d,  $J = 8.6$  Hz, 2H), 7.26 (d,  $J = 8.6$  Hz, 2H), 7.25 (d,  $J = 8.6$  Hz, 2H), 6.83 (d,  $J = 8.6$  Hz, 2H), 5.57 (s, 1H), 3.79 (s, 3H), 3.66-3.59 (m, 1H), 3.53-3.46 (m, 1H), 2.74-2.65 (m, 1H), 2.62-2.53 (m, 1H), 2.41 (s, 3H), 2.30 (t,  $J = 7.2$  Hz, 2H), 1.47-1.40 (m, 2H), 1.35-1.26 (m, 2H), 0.87 (t,  $J = 7.4$  Hz, 3H).  $^{13}\text{C}$  NMR (125 MHz)  $\delta$  ppm; 159.4, 143.9, 141.6, 135.1, 129.8, 129.7, 128.5, 127.2, 126.4, 118.2 (q,  $J_{\text{C-F}} = 320.3$  Hz), 113.8, 101.7, 71.0, 65.1, 55.2, 46.3, 29.7, 28.7, 21.7, 21.4, 18.9, 13.4.  $^{19}\text{F}$  NMR (282 MHz)  $\delta$  ppm; -75.1. FAB-LM  $m/z$ : 572 [M+H]. FAB-HM Calcd for  $\text{C}_{26}\text{H}_{29}\text{F}_3\text{NO}_6\text{S}_2$  [M+H]: 572.1388; found 572.1418.

**(Z)-1-[2-(4-Methoxyphenyl)-1-tosylpyrrolidin-3-ylidene]hept-2-yn-1-yl trifluoromethanesulfonate (Z-3ad)**

Method **A** (24 h): 18.3 mg (8%). Method **B** (24 h): 54.9 mg (24%).  $R_f = 0.34$  (hexane:AcOEt = 3:1). Red oil. IR (neat)  $\nu$   $\text{cm}^{-1}$ : 2224, 1599, 1419, 1349, 1217, 1162, 1092.  $^1\text{H}$  NMR (500 MHz)  $\delta$  ppm; 7.58 (d,  $J = 8.3$  Hz, 2H), 7.25 (d,  $J = 8.3$  Hz, 2H), 7.21 (d,  $J = 9.1$  Hz, 2H), 6.82 (d,  $J = 9.1$  Hz, 2H), 5.52 (d,  $J = 1.7$  Hz, 1H), 3.79 (s, 3H), 3.69-3.62 (m, 1H), 3.54-3.46 (m, 1H), 2.88-2.78 (m, 1H), 2.66-2.58 (m, 1H), 2.41 (s, 3H), 2.34 (t,  $J = 7.2$  Hz, 2H), 1.52-1.45 (m, 2H), 1.41-1.32 (m, 2H), 0.89 (t,  $J = 7.2$  Hz, 3H).  $^{13}\text{C}$  NMR (125 MHz)  $\delta$  ppm; 159.5, 143.7, 141.1, 134.4, 130.6, 129.6, 128.6, 127.4, 124.3, 118.1 (q,  $J_{\text{C-F}} = 320.3$  Hz), 113.9, 100.8, 71.0, 64.2, 55.2, 46.6, 29.8, 29.7, 21.8, 21.5, 18.9, 13.4.  $^{19}\text{F}$  NMR (282 MHz)  $\delta$  ppm; -74.9. FAB-LM  $m/z$ : 572 [M+H]. FAB-HM Calcd for  $\text{C}_{26}\text{H}_{29}\text{F}_3\text{NO}_6\text{S}_2$  [M+H]: 572.1388; found 572.1407.

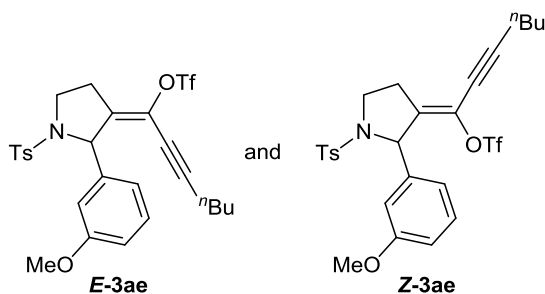

**(E)-1-[2-(3-Methoxyphenyl)-1-tosylpyrrolidin-3-ylidene]hept-2-yn-1-yl trifluoromethanesulfonate (E-3ae)**

Method **A** (24 h): 116.6 mg (51%). Method **B** (24 h): 86.9 mg (38%).  $R_f = 0.43$  (hexane:AcOEt = 3:1). White solid. MP: 84-86 °C. IR (KBr)  $\nu$   $\text{cm}^{-1}$ : 2222, 1597, 1419, 1353, 1214, 1167, 1090.  $^1\text{H}$  NMR (500 MHz)  $\delta$  ppm; 7.61 (d,  $J = 8.6$  Hz, 2H), 7.26 (d,  $J = 8.6$  Hz, 2H), 7.22 (t,  $J = 8.0$  Hz, 2H), 6.97 (dd,  $J = 8.0, 2.3$  Hz, 1H), 6.89 (t,  $J = 2.3$  Hz, 1H), 6.82 (dd,  $J = 8.0, 2.3$  Hz, 1H), 5.61 (s, 1H), 3.76 (s, 3H), 3.70-3.63 (m, 1H), 3.53-3.45 (m, 1H), 2.72-2.62 (m, 1H), 2.61-2.53 (m, 1H), 2.41 (s, 3H), 2.32 (t,  $J = 7.2$  Hz, 2H), 1.49-1.40 (m, 2H), 1.36-1.27 (m, 2H), 0.87 (t,  $J = 7.2$  Hz, 3H).  $^{13}\text{C}$  NMR (125 MHz)  $\delta$  ppm; 159.7, 144.0, 141.1, 139.0, 135.0, 129.7, 129.5, 127.2, 126.4, 119.5, 118.2 (q,  $J_{\text{C-F}} = 320.3$  Hz), 113.8, 112.5, 101.7, 71.1, 65.5, 55.1, 46.4, 29.7, 28.6, 21.7, 21.4, 18.9, 13.4. FAB-LM  $m/z$ : 572 [M+H].  $^{19}\text{F}$  NMR (282 MHz)  $\delta$  ppm; -75.1. FAB-HM Calcd for  $\text{C}_{29}\text{H}_{29}\text{F}_3\text{NO}_6\text{S}_2$  [M+H]: 572.1388; found 572.1418.

**(Z)-1-[2-(3-Methoxyphenyl)-1-tosylpyrrolidin-3-ylidene]hept-2-yn-1-yl trifluoromethanesulfonate (Z-3ae)**

Method **A** (24 h): 20.6 mg (9%). Method **B** (24 h): 32.0 mg (14%).  $R_f = 0.31$  (hexane:AcOEt = 3:1). Brown oil. IR (neat)  $\nu$   $\text{cm}^{-1}$ : 2224, 1601, 1420, 1352, 1221, 1163, 1093.  $^1\text{H}$  NMR (500 MHz)  $\delta$  ppm; 7.59 (d,  $J = 8.6$  Hz, 2H), 7.25 (d,  $J = 8.6$  Hz, 2H), 7.21 (t,  $J = 8.0$  Hz, 2H), 6.88 (dd,  $J = 8.0, 2.3$  Hz, 1H), 6.84-6.80 (m, 2H), 5.54 (d,  $J = 1.7$  Hz, 1H), 3.78 (s, 3H), 3.71-3.64 (m, 1H), 3.56-3.50 (m, 1H), 2.87-2.77 (m, 1H), 2.69-2.58 (m, 1H), 2.41 (s, 3H), 2.33 (t,  $J = 7.2$  Hz, 2H), 1.53-1.44 (m, 2H), 1.41-1.34 (m, 2H), 0.89 (t,  $J = 7.4$  Hz, 3H).  $^{13}\text{C}$  NMR (125 MHz)  $\delta$  ppm; 159.7, 143.8, 140.6, 139.9, 134.4, 129.7, 129.6, 127.5, 124.5, 119.6, 118.1 (q,  $J_{\text{C-F}} = 320.3$  Hz), 113.9, 113.0, 101.0, 70.9, 64.6, 55.2, 46.8, 29.8, 29.7, 21.8, 21.5, 19.0, 13.4.  $^{19}\text{F}$  NMR (282 MHz)  $\delta$  ppm; -74.9. FAB-LM  $m/z$ : 572 [M+H]. FAB-HM Calcd for  $\text{C}_{29}\text{H}_{29}\text{F}_3\text{NO}_6\text{S}_2$  [M+H]: 572.1388; found 572.1407.

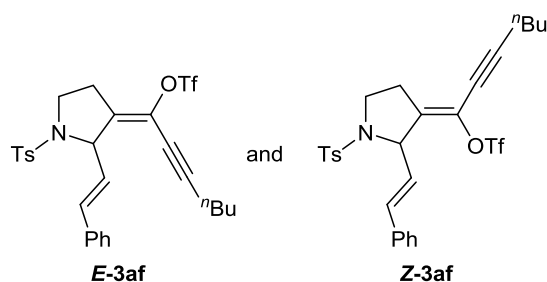

**(E)-1-[2-((E-styryl)-1-tosylpyrrolidin-3-ylidene)hept-2-yn-1-yl] trifluoromethanesulfonate (E-3af)**

Method **A** (24 h): 81.8 mg (36%). Method **B** (24 h): 52.2 mg (23%).  $R_f = 0.71$  (hexane:AcOEt = 3:1). Brown oil. IR (neat)  $\nu$   $\text{cm}^{-1}$ : 2224, 1598, 1419, 1351, 1215, 1164, 1094.  $^1\text{H}$  NMR (500 MHz)  $\delta$  ppm; 7.69 (d,  $J = 8.0$  Hz, 2H), 7.34-7.29 (m, 4H), 7.28-7.24 (m, 1H), 7.26 (d,  $J = 8.0$  Hz, 2H), 6.62 (dd,  $J = 16.1, 1.4$  Hz, 1H), 5.97 (dd,  $J = 16.1, 6.3$  Hz, 1H), 5.21 (d,  $J = 6.3$  Hz, 1H), 3.66-3.59 (m, 1H), 3.56-3.49 (m, 1H), 2.72-2.63 (m, 1H), 2.61-2.62 (m, 1H), 2.40 (s, 3H), 2.39 (t,  $J = 6.8$  Hz, 2H), 1.55-1.47 (m, 2H), 1.44-1.34 (m, 2H), 0.88 (t,  $J = 7.4$  Hz, 3H).  $^{13}\text{C}$  NMR (125 MHz)  $\delta$  ppm; 144.1, 140.4, 135.9, 135.2, 132.7, 129.8, 128.5, 128.1, 127.4, 126.7, 126.0, 123.7, 118.2 (q,  $J_{\text{C-F}} = 320.3$  Hz), 101.9, 70.9, 64.1, 46.4, 29.9, 28.4, 21.8, 21.4, 19.1, 13.4.  $^{19}\text{F}$  NMR (282 MHz)  $\delta$  ppm; -75.1. FAB-LM  $m/z$ : 568 [M+H]. FAB-HM Calcd for  $\text{C}_{27}\text{H}_{29}\text{F}_3\text{NO}_5\text{S}_2$  [M+H]: 568.1439; found 568.1464.

**(Z)-1-[2-((E-styryl)-1-tosylpyrrolidin-3-ylidene)hept-2-yn-1-yl] trifluoromethanesulfonate (Z-3af)**

Method **A** (24 h): 0 mg (0%). Method **B** (24 h): 31.8 mg (14%).  $R_f = 0.69$  (hexane:AcOEt = 3:1). Brown oil. IR (neat)  $\nu$   $\text{cm}^{-1}$ : 2224, 1599, 1420, 1352, 1218, 1164, 1094.  $^1\text{H}$  NMR (500 MHz)  $\delta$  ppm; 7.70 (d,  $J = 8.0$  Hz, 2H), 7.33-7.28 (m, 4H), 7.28-7.22 (m, 1H), 7.26 (d,  $J = 8.0$  Hz, 2H), 6.66 (dd,  $J = 16.0, 1.1$  Hz, 1H), 5.91 (dd,  $J = 16.0, 6.9$  Hz, 1H), 5.24 (d,  $J = 6.9$  Hz, 1H), 3.64-3.50 (m, 2H), 2.77-2.66 (m, 1H), 2.61-2.51 (m, 1H), 2.39 (s, 3H), 2.36 (t,  $J = 7.2$  Hz, 2H), 1.55-1.47 (m, 2H), 1.43-1.34 (m, 2H), 0.90 (t,  $J = 7.4$  Hz, 3H).  $^{13}\text{C}$  NMR (125 MHz)  $\delta$  ppm; 143.9, 139.8, 136.0, 134.8, 133.3, 129.8, 128.4, 128.0, 127.7, 126.8, 124.5, 123.7, 118.2 (q,  $J_{\text{C-F}} = 320.3$  Hz), 100.9, 71.0, 63.1, 46.5, 29.8, 29.3, 21.8, 21.5, 19.0, 13.4.  $^{19}\text{F}$  NMR (282 MHz)  $\delta$  ppm; -74.9. FAB-LM  $m/z$ : 568 [M+H]. FAB-HM Calcd for  $\text{C}_{27}\text{H}_{29}\text{F}_3\text{NO}_5\text{S}_2$  [M+H]: 568.1439; found 568.1469.

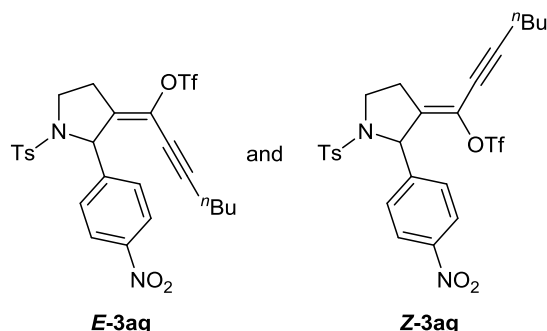

**(E)-1-[2-((4-Nitrophenyl)-1-tosylpyrrolidin-3-ylidene)hept-2-yn-1-yl] trifluoromethanesulfonate (E-3ag)**

Method **A** (2 h): 91.5 mg (39%). Method **C** (24 h): 79.8 mg (34%).  $R_f = 0.69$  (hexane:AcOEt = 3:1). White solid. MP: 101-103 °C. IR (KBr)  $\nu$   $\text{cm}^{-1}$ : 2227, 1597, 1415, 1345, 1207, 1163, 1092.  $^1\text{H}$  NMR (500 MHz)  $\delta$  ppm; 8.17 (d,  $J = 8.9$  Hz, 2H), 7.61 (d,  $J = 8.0$  Hz, 2H), 7.56 (d,  $J = 8.9$  Hz, 2H), 7.28 (d,  $J = 8.0$  Hz, 2H), 5.58 (s, 1H), 3.63-3.52 (m, 2H), 2.79-2.63 (m, 2H), 2.42 (s, 3H), 2.31 (t,  $J = 7.2$  Hz, 2H), 1.49-1.38 (m, 2H), 1.35-1.25 (m, 2H), 0.87 (t,  $J = 7.2$  Hz, 3H).  $^{13}\text{C}$  NMR (125 MHz)  $\delta$  ppm; 147.7, 145.3, 144.6, 140.4, 134.2, 129.9, 128.4, 127.3, 126.9, 123.7, 118.1 (q,  $J_{\text{C-F}} = 320.3$  Hz), 102.7, 70.9, 64.7, 46.9, 29.6, 28.7, 21.7, 21.5, 18.9, 13.3.  $^{19}\text{F}$  NMR (282 MHz)  $\delta$  (ppm); -74.7. FAB-LM  $m/z$ : 587 [M+H]. FAB-HM Calcd for  $\text{C}_{25}\text{H}_{26}\text{F}_3\text{N}_2\text{O}_7\text{S}_2$  [M+H]: 587.1134; found 587.1167.

**(Z)-1-[2-((4-Nitrophenyl)-1-tosylpyrrolidin-3-ylidene)hept-2-yn-1-yl] trifluoromethanesulfonate (Z-3ag)**

Method **A** (2 h): 25.8 mg (11%). Method **C** (24 h): 46.9 mg (20%).  $R_f = 0.37$ . Colorless oil. IR (neat)  $\nu$   $\text{cm}^{-1}$ : 2224, 1598, 1526, 1422, 1382, 1349, 1220, 1165, 1094.  $^1\text{H}$  NMR (500 MHz)  $\delta$  ppm; 8.17 (d,  $J = 8.6$  Hz, 2H), 7.61 (d,  $J = 8.6$  Hz, 2H), 7.52 (d,  $J = 8.6$  Hz, 2H), 7.30 (d,  $J = 8.6$  Hz, 2H), 5.51 (d,  $J = 1.8$  Hz, 1H), 3.80-3.74 (m, 1H), 3.48-3.41 (m, 1H), 2.94-2.84 (m, 1H), 2.76-2.67 (m, 1H), 2.42 (s, 3H), 2.34 (t,  $J = 6.9$  Hz, 2H), 1.52-1.45 (m, 2H), 1.41-1.32 (m, 2H), 0.88 (d,  $J = 7.4$  Hz, 3H).  $^{13}\text{C}$  NMR (125 MHz)  $\delta$  ppm; 147.7, 145.9, 144.5, 139.6, 133.4, 129.9, 128.5, 127.5, 125.2, 123.9, 118.0 (q,  $J_{\text{C-F}} = 320.3$  Hz), 102.0, 70.6, 63.8, 47.3, 29.71, 29.66, 21.8, 21.5, 19.0, 13.4.  $^{19}\text{F}$  NMR (282 MHz)  $\delta$  (ppm); -74.6. FAB-LM  $m/z$ : 587 [M+H]. FAB-HM Calcd for  $\text{C}_{25}\text{H}_{26}\text{F}_3\text{N}_2\text{O}_7\text{S}_2$  [M+H]: 587.1134; found 587.1166.

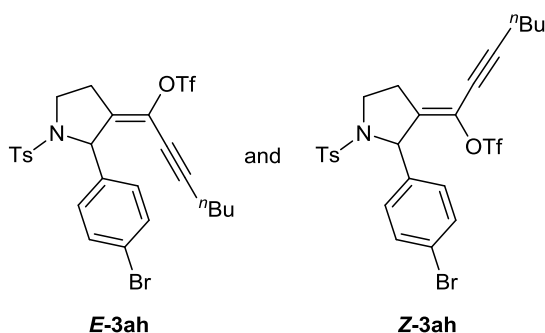

**(E)-1-[2-(4-Bromophenyl)-1-tosylpyrrolidin-3-ylidene]hept-2-yn-1-yl trifluoromethanesulfonate (E-3ah)**

Method A (2 h): 119.1 mg (48%). Method C (24 h): 99.3 mg (40%).  $R_f = 0.69$  (hexane:AcOEt = 3:1). White solid. MP: 85-86 °C. IR (KBr)  $\nu$   $\text{cm}^{-1}$ : 2225, 1596, 1417, 1349, 1216, 1162, 1092.  $^1\text{H}$  NMR (500 MHz)  $\delta$  ppm; 7.57 (d,  $J = 8.0$  Hz, 2H), 7.42 (d,  $J = 8.6$  Hz, 2H), 7.25 (d,  $J = 8.0$  Hz, 2H), 7.22 (d,  $J = 8.6$  Hz, 2H), 5.51 (s, 1H), 3.65-3.58 (m, 1H), 3.54-3.47 (m, 1H), 2.74-2.57 (m, 2H), 2.40 (s, 3H), 2.30 (t,  $J = 6.9$  Hz, 2H), 1.46-1.39 (m, 2H), 1.34-1.24 (m, 2H), 0.87 (t,  $J = 7.2$  Hz, 3H).  $^{13}\text{C}$  NMR (125 MHz)  $\delta$  ppm; 144.2, 141.0, 136.9, 134.7, 131.5, 129.8, 129.1, 127.2, 126.6, 122.2, 118.1 (q,  $J_{\text{C-F}} = 320.3$  Hz), 102.2, 70.9, 64.9, 46.5, 29.7, 28.7, 21.7, 21.4, 18.9, 13.4.  $^{19}\text{F}$  NMR (282 MHz)  $\delta$  ppm; -75.1. FAB-LM  $m/z$ : 620 [M+H]. FAB-HM Calcd for  $\text{C}_{25}\text{H}_{26}\text{BrF}_3\text{NO}_5\text{S}_2$  [M+H]: 620.0388; found 620.0381.

**(Z)-1-[2-(4-Bromophenyl)-1-tosylpyrrolidin-3-ylidene]hept-2-yn-1-yl trifluoromethanesulfonate (Z-3ah)**

Method A (2 h): 32.3 mg (13%). Method C (24 h): 54.6 mg (22%).  $R_f = 0.40$  (hexane:AcOEt = 3:1). Colorless oil. IR (neat)  $\nu$   $\text{cm}^{-1}$ : 2224, 1597, 1421, 1352, 1223, 1163, 1094, 1031.  $^1\text{H}$  NMR (500 MHz)  $\delta$  ppm; 7.57 (d,  $J = 8.6$  Hz, 2H), 7.41 (d,  $J = 8.6$  Hz, 2H), 7.26 (d,  $J = 8.6$  Hz, 2H), 7.18 (d,  $J = 8.6$  Hz, 2H), 5.47 (d,  $J = 1.7$  Hz, 1H), 3.73-3.65 (m, 1H), 3.53-3.45 (m, 1H), 2.88-2.77 (m, 1H), 2.71-2.61 (m, 1H), 2.42 (s, 3H), 2.34 (t,  $J = 7.2$  Hz, 2H), 1.53-1.45 (m, 2H), 1.41-1.32 (m, 2H), 0.89 (t,  $J = 7.5$  Hz, 3H).  $^{13}\text{C}$  NMR (125 MHz)  $\delta$  ppm; 144.0, 140.3, 137.6, 134.0, 131.7, 129.7, 129.1, 127.4, 124.7, 122.4, 118.1 (q,  $J_{\text{C-F}} = 320.3$  Hz), 101.3, 70.8, 64.0, 46.9, 29.8, 29.6, 21.8, 21.5, 18.9, 13.4.  $^{19}\text{F}$  NMR (282 MHz)  $\delta$  ppm; -74.9. FAB-LM  $m/z$ : 620 [M+H]. FAB-HM Calcd for  $\text{C}_{25}\text{H}_{26}\text{BrF}_3\text{NO}_5\text{S}_2$  [M+H]: 620.0388; found 620.0388.

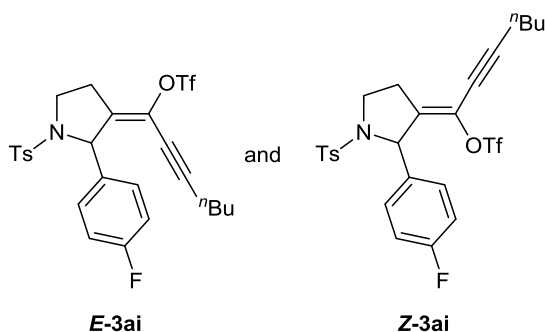

**(E)-1-[2-(4-Fluorophenyl)-1-tosylpyrrolidin-3-ylidene]hept-2-yn-1-yl trifluoromethanesulfonate (E-3ai)**

Method A (2 h): 105.2 mg (47%). Method C (24 h): 98.5 mg (44%).  $R_f = 0.40$  (hexane:AcOEt = 3:1). Yellow oil. IR (neat)  $\nu$   $\text{cm}^{-1}$ : 2224, 1604, 1422, 1352, 1218, 1164, 1095.  $^1\text{H}$  NMR (500 MHz)  $\delta$  ppm; 7.58 (d,  $J = 8.6$  Hz, 2H), 7.33 (dd,  $J_{\text{H-H,H-F}} = 8.6, 5.2$  Hz, 2H), 7.26 (d,  $J = 8.6$  Hz, 2H), 6.99 (dd,  $J_{\text{H-H,H-F}} = 8.6, 8.6$  Hz, 2H), 5.56 (s, 1H), 3.66-3.58 (m, 1H), 3.54-3.47 (m, 1H), 2.74-2.65 (m, 1H), 2.64-2.56 (m, 1H), 2.41 (s, 3H), 2.30 (t,  $J = 6.9$  Hz, 2H), 1.46-1.39 (m, 2H), 1.34-1.25 (m, 2H), 0.87 (t,  $J = 7.4$  Hz, 3H).  $^{13}\text{C}$  NMR (125 MHz)  $\delta$  ppm; 162.5 (d,  $J_{\text{C-F}} = 247.1$  Hz), 144.1, 141.2, 134.8, 133.6 (d,  $J_{\text{C-F}} = 3.6$  Hz), 129.8, 129.1 (d,  $J_{\text{C-F}} = 8.4$  Hz), 127.2, 126.5, 118.1 (q,  $J_{\text{C-F}} = 320.3$  Hz), 115.3 (d,  $J_{\text{C-F}} = 21.6$  Hz), 102.0, 70.9, 64.9, 46.4, 29.7, 28.7, 21.7, 21.4, 18.9, 13.3.  $^{19}\text{F}$  NMR (282 MHz)  $\delta$  ppm; -75.1. FAB-LM  $m/z$ : 560 [M+H]. FAB-HM Calcd for  $\text{C}_{25}\text{H}_{26}\text{F}_4\text{NO}_5\text{S}_2$  [M+H]: 560.1189; found 560.1180.

**(Z)-1-[2-(4-Fluorophenyl)-1-tosylpyrrolidin-3-ylidene]hept-2-yn-1-yl trifluoromethanesulfonate (Z-3ai)**

Method A (2 h): 24.6 mg (11%). Method C (24 h): 51.5 mg (23%).  $R_f = 0.29$  (hexane:AcOEt = 3:1). White solid. MP: 69-70 °C. IR (KBr)  $\nu$   $\text{cm}^{-1}$ : 2227, 1604, 1425, 1352, 1231, 1164, 1093.  $^1\text{H}$  NMR (500 MHz)  $\delta$  ppm; 7.57 (d,  $J = 8.0$  Hz, 2H), 7.30-7.24 (m, 4H), 6.98 (dd,  $J_{\text{H-H,H-F}} = 8.6, 8.6$  Hz, 2H), 5.51 (d,  $J = 1.7$  Hz, 1H), 3.71-3.63 (m, 1H), 3.53-3.45 (m, 1H), 2.88-2.78 (m, 1H), 2.69-2.60 (m, 1H), 2.41 (s, 3H), 2.34 (t,  $J = 7.2$  Hz, 2H), 1.54-1.44 (m, 2H), 1.41-1.32 (m, 2H), 0.89 (t,  $J = 7.4$  Hz, 3H).  $^{13}\text{C}$  NMR (125 MHz)  $\delta$  ppm; 162.6 (d,  $J_{\text{C-F}} = 247.1$  Hz), 144.0, 140.6, 134.4 (d,  $J_{\text{C-F}} = 3.6$  Hz), 134.2, 129.7, 129.2 (d,  $J_{\text{C-F}} = 8.4$  Hz), 127.4, 124.6, 118.1 (q,  $J_{\text{C-F}} = 320.3$  Hz), 115.5 (d,  $J_{\text{C-F}} = 22.8$  Hz), 101.2, 70.8, 64.0, 46.8, 29.8, 29.7, 21.8, 21.5, 19.0, 13.4.  $^{19}\text{F}$  NMR (282 MHz)  $\delta$  ppm; -74.9. FAB-LM  $m/z$ : 560 [M+H]. FAB-HM Calcd for  $\text{C}_{25}\text{H}_{26}\text{F}_4\text{NO}_5\text{S}_2$  [M+H]: 560.1189; found 560.1216.

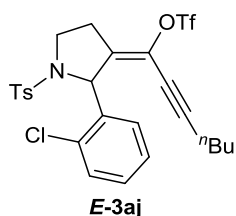

**(E)-1-[2-(2-Chlorophenyl)-1-tosylpyrrolidin-3-ylidene]hept-2-yn-1-yl trifluoromethanesulfonate (E-3aj)**

Method A (2 h): 96.8 mg (42%). Method C (24 h): 126.7 mg (55%).  $R_f = 0.43$  (hexane:AcOEt = 3:1). Brown solid. MP: 66-67 °C. IR (KBr)  $\nu$   $\text{cm}^{-1}$ : 2221, 1599, 1411, 1351, 1211, 1168, 1093.  $^1\text{H}$  NMR (500 MHz)  $\delta$  ppm: 7.64 (d,  $J = 8.0$  Hz, 2H), 7.33-7.29 (m, 1H), 7.27-7.22 (m, 3H), 7.26 (d,  $J = 8.0$  Hz, 2H), 5.74 (d,  $J = 2.3$  Hz, 1H), 3.90-3.84 (m, 1H), 3.56-3.48 (m, 1H), 3.15-3.06 (m, 1H), 2.99-2.88 (m, 1H), 2.44 (s, 3H), 2.29-2.16 (m, 2H), 1.43-1.34 (m, 2H), 1.32-1.22 (m, 2H), 0.88 (t,  $J = 7.4$  Hz, 3H).  $^{13}\text{C}$  NMR (125 MHz)  $\delta$  ppm: 143.8, 143.3, 136.8, 134.0, 133.9, 130.9, 129.5, 129.23, 129.19, 127.7, 126.9, 126.7, 118.1 (q,  $J_{\text{C-F}} = 320.3$  Hz), 103.1, 70.2, 62.0, 47.7, 29.6, 29.4, 21.7, 21.4, 19.1, 13.1.  $^{19}\text{F}$  NMR (282 MHz)  $\delta$  ppm: -75.1. FAB-LM  $m/z$ : 576 [M+H]. FAB-HM Calcd for  $\text{C}_{25}\text{H}_{26}\text{ClF}_3\text{NO}_5\text{S}_2$  [M+H]: 576.0893; found 576.0908.

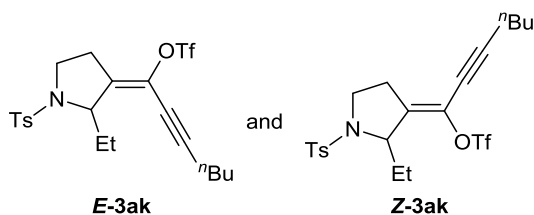

**(E)-1-(2-Ethyl-1-tosylpyrrolidin-3-ylidene)hept-2-yn-1-yl trifluoromethanesulfonate (E-3ak)**

Method C (24 h): 116.5 mg (59%).  $R_f = 0.60$  (hexane:AcOEt = 3:1). Brown oil. IR (neat)  $\nu$   $\text{cm}^{-1}$ : 2224, 1599, 1420, 1353, 1214, 1165, 1093.  $^1\text{H}$  NMR (500 MHz)  $\delta$  ppm: 7.66 (d,  $J = 8.0$  Hz, 2H), 7.30 (d,  $J = 8.0$  Hz, 2H), 4.47 (t,  $J = 5.7$  Hz, 1H), 3.55-3.41 (m, 2H), 2.58-2.48 (m, 1H), 2.42 (t,  $J = 6.9$  Hz, 2H), 2.41 (s, 3H), 2.37-2.26 (m, 1H), 1.92-1.82 (m, 1H), 1.80-1.69 (m, 1H), 1.61-1.52 (m, 2H), 1.49-1.39 (m, 2H), 1.00 (t,  $J = 7.4$  Hz, 1H), 0.95 (t,  $J = 7.2$  Hz, 3H).  $^{13}\text{C}$  NMR (125 MHz)  $\delta$  ppm: 144.0, 142.3, 134.5, 129.9, 127.2, 124.7, 118.1 (q,  $J_{\text{C-F}} = 320.3$  Hz), 101.0, 70.9, 64.1, 46.5, 29.9, 28.5, 27.0, 21.8, 21.4, 19.0, 13.4, 9.6.  $^{19}\text{F}$  NMR (282 MHz)  $\delta$  ppm: -75.2. FAB-LM  $m/z$ : 494 [M+H]. FAB-HM Calcd for  $\text{C}_{21}\text{H}_{27}\text{F}_3\text{NO}_5\text{S}_2$  [M+H]: 494.1283; found 494.1301.

**(Z)-1-(2-Ethyl-1-tosylpyrrolidin-3-ylidene)hept-2-yn-1-yl trifluoromethanesulfonate (Z-3ak)**

Method C (24 h): 35.5 mg (18%).  $R_f = 0.46$  (hexane:AcOEt = 3:1). Brown oil. IR (neat)  $\nu$   $\text{cm}^{-1}$ : 2224, 1598, 1419, 1354, 1216, 1165, 1093.  $^1\text{H}$  NMR (500 MHz)  $\delta$  ppm: 7.79 (d,  $J = 8.0$  Hz, 2H), 7.31 (d,  $J = 8.0$  Hz, 2H), 4.56 (ddd,  $J = 6.6, 4.9, 1.7$  Hz, 1H), 3.60-3.52 (m, 1H), 3.43-3.35 (m, 1H), 2.58-2.48 (m, 1H), 2.42 (s, 3H), 2.33 (t,  $J = 7.2$  Hz, 3H), 2.31-2.23 (m, 1H), 1.95-1.84 (m, 1H), 1.79-1.68 (m, 1H), 1.52-1.44 (m, 2H), 1.41-1.32 (m, 2H), 0.99 (t,  $J = 7.4$  Hz, 1H), 0.89 (t,  $J = 7.4$  Hz, 3H).  $^{13}\text{C}$  NMR (125 MHz)  $\delta$  ppm: 143.9, 141.4, 134.1, 129.9, 127.5, 123.4, 118.2 (q,  $J_{\text{C-F}} = 320.3$  Hz), 100.3, 71.0, 63.2, 46.7, 29.9, 29.7, 27.2, 21.8, 21.5, 18.9, 13.4, 9.5.  $^{19}\text{F}$  NMR (282 MHz)  $\delta$  ppm: -75.1. FAB-LM  $m/z$ : 494 [M+H]. FAB-HM Calcd for  $\text{C}_{21}\text{H}_{27}\text{F}_3\text{NO}_5\text{S}_2$  [M+H]: 494.1283; found 494.1289.

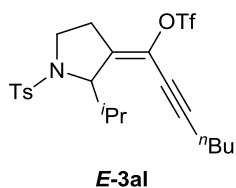

**(E)-1-(2-Isopropyl-1-tosylpyrrolidin-3-ylidene)hept-2-yn-1-yl trifluoromethanesulfonate (E-3al)**

Method C (24 h): 75.1 mg (37%).  $R_f = 0.66$  (hexane:AcOEt = 3:1). Brown oil. IR (neat)  $\nu$   $\text{cm}^{-1}$ : 2225, 1599, 1420, 1351, 1214, 1164, 1092.  $^1\text{H}$  NMR (500 MHz)  $\delta$  ppm: 7.65 (d,  $J = 8.6$  Hz, 2H), 7.28 (d,  $J = 8.6$  Hz, 2H), 4.40 (dd,  $J = 6.3, 1.2$  Hz, 1H), 3.63-3.56 (m, 1H), 3.51-3.43 (m, 1H), 2.53-2.46 (m, 1H), 2.43 (t,  $J = 6.9$  Hz, 2H), 2.41 (s, 3H), 2.32-2.23 (m, 1H), 2.03 (qd,  $J = 6.9, 6.9$  Hz, 1H), 1.63-1.54 (m, 2H), 1.51-1.41 (m, 2H), 1.05 (d,  $J = 6.9$  Hz, 3H), 1.04 (d,  $J = 6.9$  Hz, 3H), 0.96 (t,  $J = 7.2$  Hz, 3H).  $^{13}\text{C}$  NMR (125 MHz)  $\delta$  ppm: 144.0, 141.1, 134.8, 129.9, 127.2, 125.4, 118.2 (q,  $J_{\text{C-F}} = 320.3$  Hz), 100.4, 71.5, 68.9, 46.8, 33.5, 29.9, 28.4, 21.9, 21.5, 19.2, 19.0, 13.4.  $^{19}\text{F}$  NMR (282 MHz)  $\delta$  ppm: 75.2. FAB-LM  $m/z$ : 508 [M+H]. FAB-HM Calcd for  $\text{C}_{22}\text{H}_{29}\text{F}_3\text{NO}_5\text{S}_2$  [M+H]: 508.1439; found 508.1474.



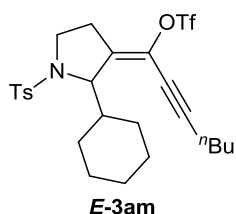

**(E)-1-(2-Cyclohexyl-1-tosylpyrrolidin-3-ylidene)hept-2-yn-1-yl trifluoromethanesulfonate (E-3am)**

Method A (6 h): 45.9 mg (21%). Method C (24 h): 105.1 mg (48%).  $R_f = 0.54$  (hexane:AcOEt = 3:1). Red oil. IR (neat)  $\nu$   $\text{cm}^{-1}$ ; 2225, 1598, 1419, 1348, 1218, 1163, 1092.  $^1\text{H}$  NMR (500 MHz)  $\delta$  ppm; 7.63 (d,  $J = 8.6$  Hz, 2H), 7.27 (d,  $J = 8.6$  Hz, 2H), 4.39 (d,  $J = 6.3$  Hz, 1H), 3.62-3.53 (m, 1H), 3.49-3.40 (m, 1H), 2.50-2.41 (m, 1H), 2.43 (t,  $J = 7.2$  Hz, 2H), 2.40 (s, 3H), 2.31-2.20 (m, 1H), 1.93-1.85 (m, 1H), 1.93-1.85 (m, 1H), 1.83-1.69 (m, 3H), 1.69-1.61 (m, 2H), 1.61-1.53 (m, 2H), 1.52-1.41 (m, 2H), 1.26-1.07 (m, 5H), 0.96 (t,  $J = 7.4$  Hz, 3H).  $^{13}\text{C}$  NMR (125 MHz)  $\delta$  ppm; 144.0, 140.8, 134.8, 129.8, 127.1, 125.3, 118.2 (q,  $J_{\text{C-F}} = 320.3$  Hz), 100.3, 71.6, 68.3, 46.6, 42.8, 29.9, 29.6, 29.5, 28.4, 26.13, 26.10, 26.0, 21.8, 21.4, 19.0, 13.4.  $^{19}\text{F}$  NMR (282 MHz)  $\delta$  ppm; -75.2. FAB-LM  $m/z$ : 548 [M+H]. FAB-HM Calcd for  $\text{C}_{25}\text{H}_{33}\text{F}_3\text{NO}_5\text{S}_2$  [M+H]: 548.1752; found 548.1789.

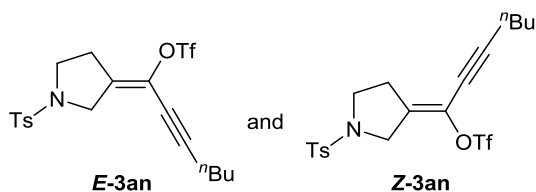

**(E)-1-(1-Tosylpyrrolidin-3-ylidene)hept-2-yn-1-yl trifluoromethanesulfonate (E-3an)**

Method A (24 h): 29.5 mg (16%). Method B (24 h): 40.1 mg (22%).  $R_f = 0.57$  (hexane:AcOEt = 3:1). Brown solid. MP: 53-55 °C. IR (KBr)  $\nu$   $\text{cm}^{-1}$ ; 2224, 1598, 1419, 1351, 1217, 1165, 1093.  $^1\text{H}$  NMR (500 MHz)  $\delta$  ppm; 7.71 (d,  $J = 8.3$  Hz, 2H), 7.36 (d,  $J = 8.3$  Hz, 2H), 3.95 (s, 2H), 3.34 (t,  $J = 6.9$  Hz, 2H), 2.68 (t,  $J = 6.9$  Hz, 2H), 2.45 (s, 3H), 2.40 (t,  $J = 6.9$  Hz, 2H), 1.58-1.50 (m, 2H), 1.47-1.37 (m, 2H), 0.94 (t,  $J = 7.2$  Hz, 3H).  $^{13}\text{C}$  NMR (125 MHz)  $\delta$  ppm; 144.3, 138.5, 132.1, 129.9, 127.8, 124.3, 118.2 (q,  $J_{\text{C-F}} = 321.5$  Hz), 101.4, 70.7, 50.8, 47.9, 29.9, 28.9, 21.8, 21.5, 19.0, 13.4.  $^{19}\text{F}$  NMR (282 MHz)  $\delta$  ppm; -75.1. FAB-LM  $m/z$ : 466 [M+H]. FAB-HM Calcd for  $\text{C}_{19}\text{H}_{23}\text{F}_3\text{NO}_5\text{S}_2$  [M+H]: 466.0970; found: 466.0975.

**(Z)-1-(1-Tosylpyrrolidin-3-ylidene)hept-2-yn-1-yl trifluoromethanesulfonate (Z-3an)**

Method A (24 h): 18.5 mg (10%). Method B (24 h): 32.7 mg (17%).  $R_f = 0.51$  (hexane:AcOEt = 3:1). Brown oil. IR (neat)  $\nu$   $\text{cm}^{-1}$ ; 2224, 1597, 1423, 1349, 1226, 1168, 1094.  $^1\text{H}$  NMR (500 MHz)  $\delta$  ppm; 7.71 (d,  $J = 8.1$  Hz, 2H), 7.36 (d,  $J = 8.1$  Hz, 2H), 4.01 (s, 2H), 3.35 (t,  $J = 6.9$  Hz, 2H), 2.64 (t,  $J = 6.9$  Hz, 2H), 2.45 (s, 3H), 2.36 (t,  $J = 6.9$  Hz, 2H), 1.55-1.46 (m, 2H), 1.44-1.33 (m, 2H), 0.90 (t,  $J = 7.5$  Hz, 3H).  $^{13}\text{C}$  NMR (125 MHz)  $\delta$  (ppm); 144.3, 138.0, 131.9, 129.9, 127.9, 124.2, 118.2 (q,  $J_{\text{C-F}} = 320.3$  Hz), 100.7, 70.9, 49.8, 47.7, 29.9, 29.8, 21.8, 21.5, 19.0, 13.4.  $^{19}\text{F}$  NMR (282 MHz)  $\delta$  ppm; -74.9. FAB-LM  $m/z$ : 466 [M+H]. FAB-HM Calcd for  $\text{C}_{19}\text{H}_{23}\text{F}_3\text{NO}_5\text{S}_2$  [M+H]: 466.0970; found: 466.0975.

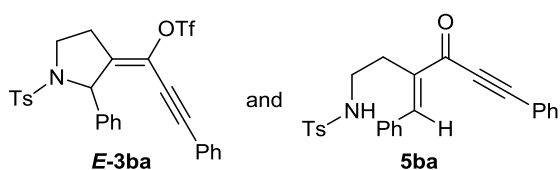

**(E)-3-Phenyl-1-(2-phenyl-1-tosylpyrrolidin-3-ylidene)prop-2-yn-1-yl trifluoromethanesulfonate (E-3ba)**

Method A (2 h): 49.0 mg (22%). Method B (2 h): 71.2 mg (32%).  $R_f = 0.49$  (hexane:AcOEt = 3:1). Yellow solid. MP: 97-99 °C. IR (KBr)  $\nu$   $\text{cm}^{-1}$ ; 2212, 1598, 1423, 1351, 1217, 1168, 1091.  $^1\text{H}$  NMR (500 MHz)  $\delta$  ppm; 7.58 (d,  $J = 8.0$  Hz, 2H), 7.41-7.36 (m, 3H), 7.35-7.27 (m, 7H), 7.23 (d,  $J = 8.0$  Hz, 2H), 5.68 (s, 1H), 3.74-3.64 (m, 1H), 3.62-3.53 (m, 1H), 2.85-2.76 (m, 1H), 2.75-2.65 (m, 1H), 2.38 (s, 3H).  $^{13}\text{C}$  NMR (125 MHz)  $\delta$  ppm; 144.0, 143.3, 137.7, 134.8, 131.5, 130.1, 129.8, 128.6, 128.5, 128.2, 127.4, 127.2, 126.2, 120.3, 118.2 (q,  $J_{\text{C-F}} = 320.3$  Hz), 99.0, 78.7, 65.7, 46.5, 29.1, 21.5.  $^{19}\text{F}$  NMR (282 MHz)  $\delta$  ppm; -75.0. FAB-LM  $m/z$ : 562 [M+H]. FAB-HM Calcd for  $\text{C}_{27}\text{H}_{23}\text{F}_3\text{NO}_5\text{S}_2$  [M+H]: 562.0970; found 562.1001.

**(E)-N-(3-Benzylidene-4-oxo-6-phenylhex-5-yn-1-yl)-4-methylbenzenesulfonamide (5ba)**

Method A (2 h): 32.7 mg (19%). Method B (2 h): 26.1 mg (15%).  $R_f = 0.34$  (hexane:AcOEt = 3:1). Yellow oil. IR (neat)  $\nu$   $\text{cm}^{-1}$ ; 3284, 2200, 1617, 1330, 1159.  $^1\text{H}$  NMR (500 MHz)  $\delta$  ppm; 8.15 (s, 1H), 7.71 (d,  $J = 8.6$  Hz, 2H), 7.65-7.60 (m, 2H), 7.51-7.37 (m, 8H), 7.26 (d,  $J = 8.6$  Hz, 2H), 4.82 (t,  $J = 6.9$  Hz, 1H), 3.17 (q,  $J = 6.9$  Hz, 2H), 2.82 (t,  $J = 6.9$  Hz, 2H), 2.38 (s, 3H).  $^{13}\text{C}$  NMR (125 MHz)  $\delta$  ppm; 180.8, 148.6, 143.3, 138.6, 136.9, 134.4, 132.8, 130.7, 129.9, 129.7, 129.0, 128.7, 127.0, 120.0, 93.0, 85.8, 41.9, 26.2, 21.5 (note that two carbon peaks overlap with each other). FAB-LM  $m/z$ : 430 [M+H]. FAB-HM Calcd for  $\text{C}_{26}\text{H}_{24}\text{NO}_3\text{S}$  [M+H]: 430.1477; found 430.1503.

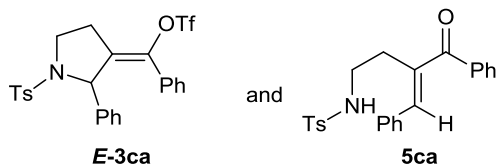

**(E)-Phenyl(2-phenyl-1-tosylpyrrolidin-3-ylidene)methyl trifluoromethanesulfonate (E-3ca)**

Method **A** (2 h): 30.5 mg (14%). Method **B** (2 h): 10.9 mg (5%).  $R_f = 0.51$  (hexane:AcOEt = 3:1). White solid. MP: 113-114 °C. IR (KBr)  $\nu$   $\text{cm}^{-1}$ ; 1598, 1415, 1346, 1226, 1161, 1091.  $^1\text{H}$  NMR (500 MHz)  $\delta$  ppm; 7.42 (d,  $J = 8.1$  Hz, 2H), 7.40-7.26 (m, 8H), 7.17 (d,  $J = 8.1$  Hz, 2H), 7.05 (d,  $J = 7.5$  Hz, 2H), 5.51 (s, 1H), 3.80-3.70 (m, 1H), 3.48-3.36 (m, 1H), 2.87-2.76 (m, 1H), 2.76-2.67 (m, 1H), 2.44 (s, 3H).  $^{13}\text{C}$  NMR (125 MHz)  $\delta$  ppm; 143.8, 142.0, 138.2, 134.9, 133.4, 131.3, 130.2, 129.7, 128.8, 128.5, 128.2, 127.4, 127.2, 127.1, 118.0 (q,  $J_{\text{C-F}} = 320.3$  Hz), 64.9, 45.2, 29.1, 21.4.  $^{19}\text{F}$  NMR (282 MHz)  $\delta$  ppm; -75.5. FAB-LM  $m/z$ : 538 [M+H]. FAB-HM Calcd for  $\text{C}_{25}\text{H}_{23}\text{F}_3\text{NO}_5\text{S}_2$  [M+H]: 538.0970; found 538.0941.

**(E)-N-(3-Benzoyl-4-phenylbut-3-en-1-yl)-4-methylbenzenesulfonamide (5ca)**

Method **A** (2 h): 106.7 mg (66%). Method **B** (2 h): 121.7 mg (75%).  $R_f = 0.20$  (hexane:AcOEt = 3:1). White solid. MP: 116-117 °C. IR (KBr)  $\nu$   $\text{cm}^{-1}$ ; 3289, 1644, 1320, 1152.  $^1\text{H}$  NMR (300 MHz)  $\delta$  ppm; 7.85-7.65 (m, 4H), 7.62-7.28 (m, 9H), 7.22 (d,  $J = 8.1$  Hz, 2H), 5.10 (t,  $J = 5.4$  Hz, 1H), 3.19 (td,  $J = 6.6, 5.4$  Hz, 2H), 2.89 (t,  $J = 6.6$  Hz, 2H), 2.38 (s, 3H).  $^{13}\text{C}$  NMR (75 MHz)  $\delta$  ppm; 199.7, 145.0, 143.2, 137.9, 137.5, 136.8, 134.7, 132.0, 129.7, 129.6, 129.20, 129.15, 128.8, 128.3, 127.0, 41.9, 27.6, 21.3. FAB-LM  $m/z$ : 406 [M+H]. FAB-HM Calcd for  $\text{C}_{24}\text{H}_{24}\text{NO}_3\text{S}$  [M+H]<sup>+</sup> 406.1477; found 406.1439.

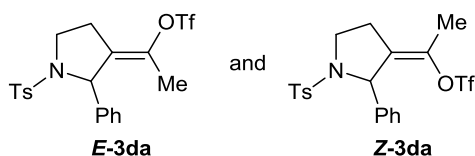

**(E)-1-(2-Phenyl-1-tosylpyrrolidin-3-ylidene)ethyl trifluoromethanesulfonate (E-3da)**

Method **A** (8 h): 55.6 mg (29%). Method **B** (8 h): 53.3 mg (28%).  $R_f = 0.37$  (hexane:AcOEt = 3:1). White solid. MP: 128-129 °C. IR (KBr)  $\nu$   $\text{cm}^{-1}$ ; 1599, 1406, 1342, 1216, 1164, 1092.  $^1\text{H}$  NMR (500 MHz)  $\delta$  ppm; 7.55 (d,  $J = 8.0$  Hz, 2H), 7.36-7.27 (m, 5H), 7.23 (d,  $J = 8.0$  Hz, 2H), 5.45 (s, 1H), 3.69-3.60 (m, 1H), 3.48-3.40 (m, 1H), 2.76-2.65 (m, 1H), 2.64-2.52 (m, 1H), 2.41 (s, 3H), 1.83 (s, 3H).  $^{13}\text{C}$  NMR (125 MHz)  $\delta$  ppm; 143.9, 140.8, 137.9, 135.1, 132.8, 129.7, 128.8, 128.3, 127.5, 127.1, 118.1 (q,  $J_{\text{C-F}} = 320.3$  Hz), 64.4, 46.3, 28.5, 21.5, 17.0.  $^{19}\text{F}$  NMR (282 MHz)  $\delta$  ppm; -76.2. FAB-LM  $m/z$ : 476 [M+H]. FAB-HM Calcd for  $\text{C}_{20}\text{H}_{21}\text{F}_3\text{NO}_5\text{S}_2$  [M+H]: 476.0813; found 476.0851.

**(Z)-1-(2-Phenyl-1-tosylpyrrolidin-3-ylidene)ethyl trifluoromethanesulfonate (Z-3da)**

Method **A** (8 h): 20.5 mg (11%). Method **B** (8 h): 22.8 mg (12%).  $R_f = 0.20$  (hexane:AcOEt = 3:1). Yellow oil. IR (neat)  $\nu$   $\text{cm}^{-1}$ ; 1599, 1407, 1341, 1223, 1163, 1093.  $^1\text{H}$  NMR (300 MHz)  $\delta$  ppm; 7.62 (d,  $J = 8.1$  Hz, 2H), 7.36-7.26 (m, 5H), 7.24 (d,  $J = 8.1$  Hz, 2H), 5.58 (s, 1H), 3.70-3.59 (m, 1H), 3.58-3.47 (m, 1H), 2.80-2.60 (m, 2H), 2.42 (s, 3H), 1.93 (s, 3H).  $^{13}\text{C}$  NMR (75 MHz)  $\delta$  ppm; 143.8, 139.1, 134.3, 132.2, 129.7, 128.5, 128.1, 127.5, 127.3, 118.0 (q,  $J_{\text{C-F}} = 322.6$  Hz), 64.2, 46.8, 28.2, 21.4, 17.1 (note that two carbon peaks overlap with each other).  $^{19}\text{F}$  NMR (282 MHz)  $\delta$  ppm; -75.9. FAB-LM  $m/z$ : 476 [M+H]. FAB-HM Calcd for  $\text{C}_{20}\text{H}_{21}\text{F}_3\text{NO}_5\text{S}_2$  [M+H]: 476.0813; found 476.0844.

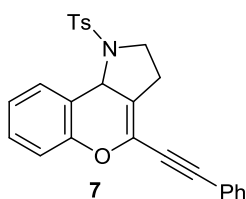

**4-(Phenylethynyl)-1-tosyl-1,2,3,9b-tetrahydrochromeno-[4,3-b]pyrrole (7)**

Method **B** (18 h): 107.8 mg (63%).  $R_f = 0.34$  (hexane:AcOEt = 3:1). White solid. MP: 136-137 °C. IR (KBr)  $\nu$   $\text{cm}^{-1}$ ; 2219, 1344, 1159.  $^1\text{H}$ -NMR (500 MHz)  $\delta$  ppm; 7.99 (d,  $J = 7.4$  Hz, 1H), 7.82 (d,  $J = 8.0$  Hz, 2H), 7.50-7.44 (m, 2H), 7.37 (d,  $J = 8.0$  Hz, 2H), 7.36-7.23 (m, 5H), 7.13 (dd,  $J = 8.0, 1.1$  Hz, 1H), 5.14 (s, 1H), 3.92 (dd,  $J = 12.6, 8.0$  Hz, 1H), 3.32-3.21 (m, 1H), 2.54 (dd,  $J = 13.8, 5.2$  Hz, 1H), 2.46 (s, 3H), 1.97-1.86 (m, 1H).  $^{13}\text{C}$  NMR (125 MHz)  $\delta$  ppm; 151.4, 144.2, 135.0, 131.6, 130.1, 129.2, 128.4, 128.3, 127.9, 127.7, 124.6, 122.0, 121.4, 120.8, 115.9, 99.8, 93.6, 81.1, 55.6, 48.7, 28.4, 21.6. FAB-LM  $m/z$ : 428 [M+H]. FAB-HM Calcd for  $\text{C}_{26}\text{H}_{22}\text{NO}_3\text{S}$  [M+H]: 428.1320; found 428.1309.

## Synthesis and Characterization of *F*-Substituted Pyrrolidines **4aa**

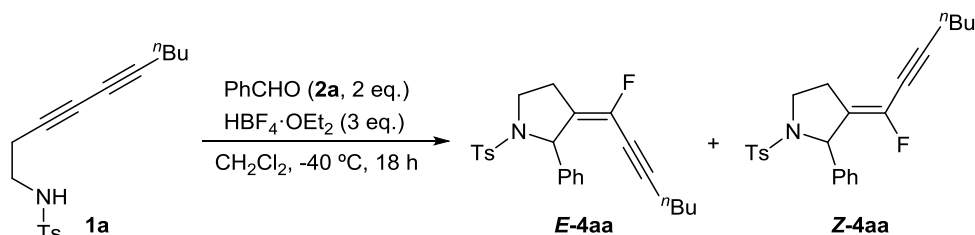

To a solution of 3,5-diynyl amide **1a** (121.4 mg, 0.40 mmol) and benzaldehyde (**2a**, 81.6  $\mu\text{L}$ , 0.80 mmol) in  $\text{CH}_2\text{Cl}_2$  (2.5 mL) was added  $\text{HBF}_4 \cdot \text{OEt}_2$  (163.3  $\mu\text{L}$ , 1.2 mmol) at  $-40\text{ }^\circ\text{C}$ . After being stirred at same temperature for 18 h, the reaction mixture was quenched with sat.  $\text{NaHCO}_3$  and extracted with  $\text{AcOEt}$ . The organic layer was dried over  $\text{MgSO}_4$  and concentrated in vacuo to dryness. The residue was purified by MPLC to give **4aa** (77.5 mg, 47%) as a mixture of geometric isomers (*E*:*Z* = 64:36).

### (*E*)- and (*Z*)-3-(1-Fluorohept-2-yn-1-ylidene)-2-phenyl-1-tosylpyrrolidine (**E-4aa** and **Z-4aa**)

$R_f = 0.57$  (hexane:AcOEt = 3:1). Colorless oil. IR (neat)  $\nu\text{ cm}^{-1}$ : 2224, 1351, 1163, 1118.  $^1\text{H}$  NMR (500 MHz, mixture of *E* and *Z* isomers)  $\delta$  ppm for **E-4aa**: 7.60 (d, 2H,  $J = 8.1$  Hz), 7.38-7.33 (m, 2H), 7.32-7.27 (m, 3H), 7.24 (d,  $J = 8.1$  Hz, 2H), 5.48 (s, 1H), 3.59-3.51 (m, 2H), 2.61-2.51 (m, 2H), 2.42 (s, 3H), 2.36-2.29 (m, 2H), 1.53-1.44 (m, 2H), 1.41-1.31 (m, 2H), 0.90 (t,  $J = 7.4$  Hz, 3H);  $\delta$  ppm for **Z-4aa**: 7.62 (d, 2H,  $J = 8.1$  Hz), 7.38-7.33 (m, 2H), 7.32-7.27 (m, 3H), 7.24 (d,  $J = 8.1$  Hz, 2H), 5.55 (s, 1H), 3.68-3.60 (m, 1H), 3.51-3.42 (m, 1H), 2.70-2.61 (m, 1H), 2.48-2.44 (m, 1H), 2.42 (s, 3H), 2.36-2.29 (m, 2H), 1.53-1.44 (m, 2H), 1.41-1.31 (m, 2H), 0.89 (t,  $J = 7.4$  Hz, 3H).  $^{13}\text{C}$  NMR (125 MHz, mixture of *E* and *Z* isomers)  $\delta$  ppm for **E-4aa**: 143.4, 139.3, 137.1 (d,  $J = 233.9$  Hz), 134.6, 129.3, 128.0, 127.43, 127.1, 126.8, 126.4 (d,  $J = 22.8$  Hz), 99.0 (d,  $J = 6.0$  Hz), 71.1 (d,  $J = 42.0$  Hz), 64.4 (d,  $J = 3.6$  Hz), 46.8, 29.7, 26.3, 21.53, 21.19, 18.61, 13.24;  $\delta$  ppm for **Z-4aa**: 143.5, 139.5, 135.5 (d,  $J = 233.9$  Hz), 134.1, 129.4, 128.1, 127.37, 127.2, 126.6, 126.1 (d,  $J = 21.6$  Hz), 97.8 (d,  $J = 7.2$  Hz), 70.9 (d,  $J = 42.0$  Hz), 63.1, 46.9, 29.8, 27.4, 21.51, 21.21, 18.56, 13.21.  $^{19}\text{F}$  NMR (282 MHz)  $\delta$  (ppm) for **E-4aa**: -108.2;  $\delta$  (ppm) for **Z-4aa**: -106.5. FAB-LM  $m/z$ : 412 [M+H]. FAB-HM Calcd for  $\text{C}_{26}\text{H}_{23}\text{FNO}_2\text{S}$  [M+H]: 412.1747; found 412.1720.

## Synthesis and Characterization of *Cl*-Substituted Pyrrolidines **6aa**

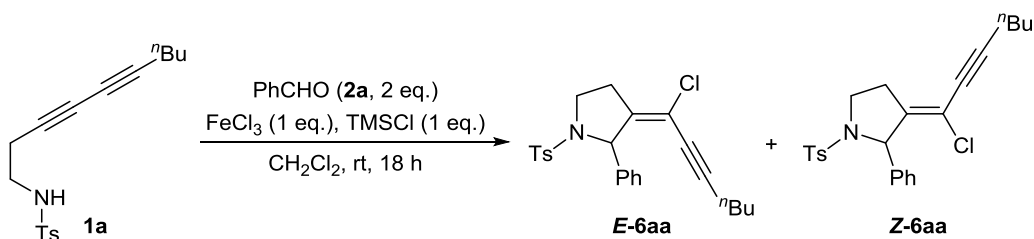

To a solution of 3,5-diynyl amide **1a** (121.4 mg, 0.40 mmol) and benzaldehyde (**2a**, 81.6  $\mu\text{L}$ , 0.80 mmol) in  $\text{CH}_2\text{Cl}_2$  (2.5 mL) was added  $\text{FeCl}_3$  (64.9 mg, 0.4 mmol) and chlorotrimethylsilane (50.5  $\mu\text{L}$ , 0.4 mmol) at  $0\text{ }^\circ\text{C}$ . After being stirred at room temperature for 18 h, the reaction mixture was quenched with sat.  $\text{NH}_4\text{Cl}$  and extracted with  $\text{CH}_2\text{Cl}_2$ . The organic layer was dried over  $\text{MgSO}_4$  and concentrated in vacuo to dryness. The residue was purified by MPLC to give **6aa** (101.4 mg, 59%) as a mixture of geometric isomers (*E*:*Z* = 78:22).

### (*E*)- and (*Z*)-3-(1-Chlorohept-2-yn-1-ylidene)-2-phenyl-1-tosylpyrrolidine (**E-6aa** and **Z-6aa**)

$R_f = 0.31$  (hexane:AcOEt = 3:1). Brown oil. IR (neat)  $\nu\text{ cm}^{-1}$ : 2220, 1351, 1163, 1118, 1093.  $^1\text{H}$  NMR (500 MHz, mixture of *E* and *Z* isomers)  $\delta$  ppm: 7.61-7.55 (m, 2H), 7.37-7.31 (m, 2H), 7.31-7.18 (m, 5H), 5.59 (s, 0.78H for **E-6aa**), 5.56 (s, 0.22H for **E-6aa**), 3.68-3.44 (m, 2H), 2.83-2.42 (m, 2H), 2.40 (s, 3H), 2.35-2.27 (m, 2H), 1.52-1.40 (m, 2H), 1.40-1.26 (m, 2H), 0.91-0.85 (m, 3H).  $^{13}\text{C}$  NMR (125 MHz, mixture of *E* and *Z* isomers)  $\delta$  ppm for **E-4aa**: 145.4, 143.7, 138.5, 134.9, 129.5, 128.2, 127.7, 127.3, 127.2, 109.5, 97.5, 76.1, 66.7, 46.3, 30.8, 30.0, 21.8, 21.5, 19.0, 13.5;  $\delta$  ppm for **Z-4aa**: 144.9, 143.6, 138.1, 134.7, 129.5, 128.3, 127.8, 127.5, 127.3, 108.2, 96.4, 76.0, 66.1, 46.7, 31.3, 30.2, 21.8, 21.5, 18.9, 13.6. FAB-LM  $m/z$ : 428 [M+H]. FAB-HM Calcd for  $\text{C}_{24}\text{H}_{26}\text{ClNO}_2\text{S}$  [M+H]: 428.1451; found 428.1486.

### Suzuki-Miyaura Coupling Reaction of *E*-3aa

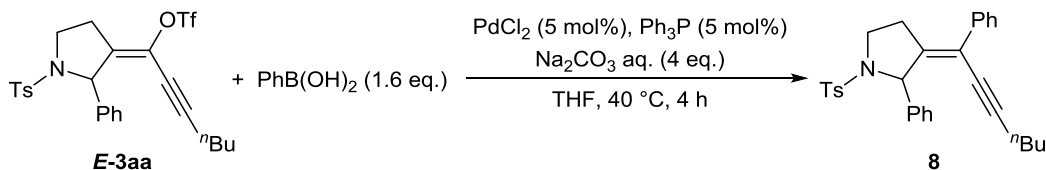

To a solution of PdCl<sub>2</sub> (1.8 mg, 10 μmol), Ph<sub>3</sub>P (2.6 mg, 10 μmol) and *E*-3aa (108.3 mg, 0.2 mmol) in THF (2.5 mL) was added phenylboronic acid (39.0 mg, 0.32 mmol) and Na<sub>2</sub>CO<sub>3</sub> (2M solution in H<sub>2</sub>O, 0.4 mL, 0.8 mmol) at room temperature. After being stirred at 40 °C for 4 h, the reaction mixture was quenched with H<sub>2</sub>O and extracted with AcOEt. The organic layer was dried over MgSO<sub>4</sub> and concentrated in vacuo to dryness. The residue was purified by silica gel column chromatography (hexane:AcOEt = 3:1) to give **8** (66.2 mg, 70 %).

### (*Z*)-2-Phenyl-3-(1-phenylhept-2-yn-1-ylidene)-1-tosylpyrrolidine (**8**)

*R*<sub>f</sub> = 0.51 (hexane:AcOEt = 3:1). Brown oil. IR (neat) ν cm<sup>-1</sup>; 2219, 1350, 1162. <sup>1</sup>H-NMR (500 MHz) δ ppm; 7.44 (d, *J* = 8.0 Hz, 2H), 7.26-7.20 (m, 6H), 7.18 (d, *J* = 8.0 Hz, 2H), 7.18-7.14 (m, 2H), 7.05-6.99 (m, 2H), 5.51 (s, 1H), 3.68-3.60 (m, 1H), 3.52-3.43 (m, 1H), 2.85-2.69 (m, 2H), 2.43 (s, 3H), 2.32 (t, *J* = 7.2 Hz, 2H), 1.55-1.46 (m, 2H), 1.45-1.35 (m, 2H), 0.92 (q, *J* = 7.1 Hz, 3H). <sup>13</sup>C NMR (125 MHz) δ ppm; 145.0, 143.2, 139.9, 137.8, 135.0, 129.4, 128.3, 128.1, 127.7, 127.55, 127.52, 127.50, 127.2, 119.8, 95.5, 79.6, 65.1, 45.5, 32.2, 30.8, 21.8, 21.5, 19.1, 13.5. FAB-LM *m/z*: 470 [M+H]. FAB-HM Calcd for C<sub>30</sub>H<sub>32</sub>NO<sub>2</sub>S [M+H]: 470.2154; found 470.2150.

### Sonogashira Coupling Reaction of *E*-3aa

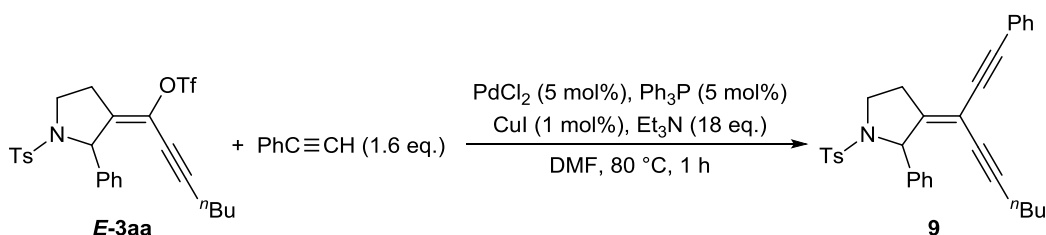

To a solution of PdCl<sub>2</sub> (1.8 mg, 10 μmol), Ph<sub>3</sub>P (2.6 mg, 10 μmol), CuI (0.4 mg, 2 μmol) and *E*-3aa (108.3 mg, 0.2 mmol) in DMF (2.5 mL) was added ethynylbenzene (35.1 μL, 0.32 mmol) and Et<sub>3</sub>N (0.5 mL, 3.6 mmol) at room temperature. After being stirred at 80 °C for 1 h, the reaction mixture was quenched with sat. NH<sub>4</sub>Cl and extracted with AcOEt. The organic layer was dried over MgSO<sub>4</sub> and concentrated in vacuo to dryness. The residue was purified by silica gel column chromatography (hexane:AcOEt = 3:1) to give **9** (62.8 mg, 64 %).

### (*E*)-2-Phenyl-3-(1-phenylnona-1,4-diyn-3-ylidene)-1-tosylpyrrolidine (**9**)

*R*<sub>f</sub> = 0.37 (hexane:AcOEt = 3:1). Brown oil. IR (neat) ν cm<sup>-1</sup>; 2227, 1350, 1163. <sup>1</sup>H-NMR (500 MHz) δ ppm; 7.69 (d, *J* = 8.6 Hz, 2H), 7.43-7.38 (m, 2H), 7.37-7.25 (m, 8H), 7.23 (d, *J* = 8.6 Hz, 2H), 5.68 (s, 1H), 3.68-3.54 (m, 2H), 2.85-2.72 (m, 2H), 2.40 (s, 3H), 2.32 (t, *J* = 7.2 Hz, 2H), 1.56-1.46 (m, 2H), 1.45-1.35 (m, 2H), 0.91 (t, *J* = 7.5 Hz, 3H). <sup>13</sup>C NMR (125 MHz) δ ppm; 156.4, 143.5, 139.3, 134.9, 131.4, 129.5, 128.6, 128.3, 127.6, 127.5, 127.3, 122.5, 101.0, 94.4, 92.9, 85.4, 76.3, 66.6, 46.7, 31.2, 30.5, 21.9, 21.5, 19.0, 13.5 (note that two carbon peaks overlap with each other). FAB-LM *m/z*: 494 [M+H]. FAB-HM Calcd for C<sub>32</sub>H<sub>32</sub>NO<sub>2</sub>S [M+H]: 494.2154; found 494.2191.

# $^1\text{H}$ and $^{13}\text{C}$ NMR spectra of new compounds

## $^1\text{H}$ NMR of **1a**

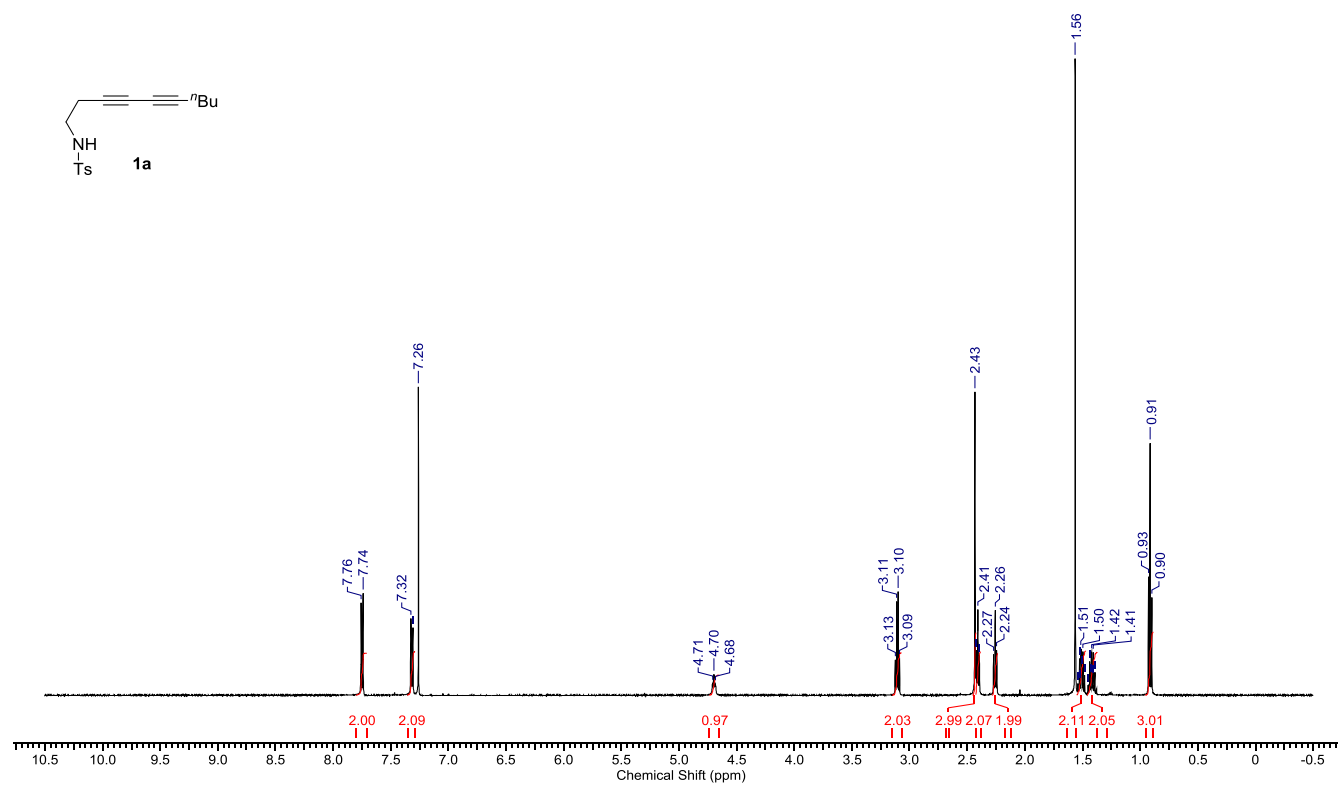

## $^{13}\text{C}$ NMR of **1a**

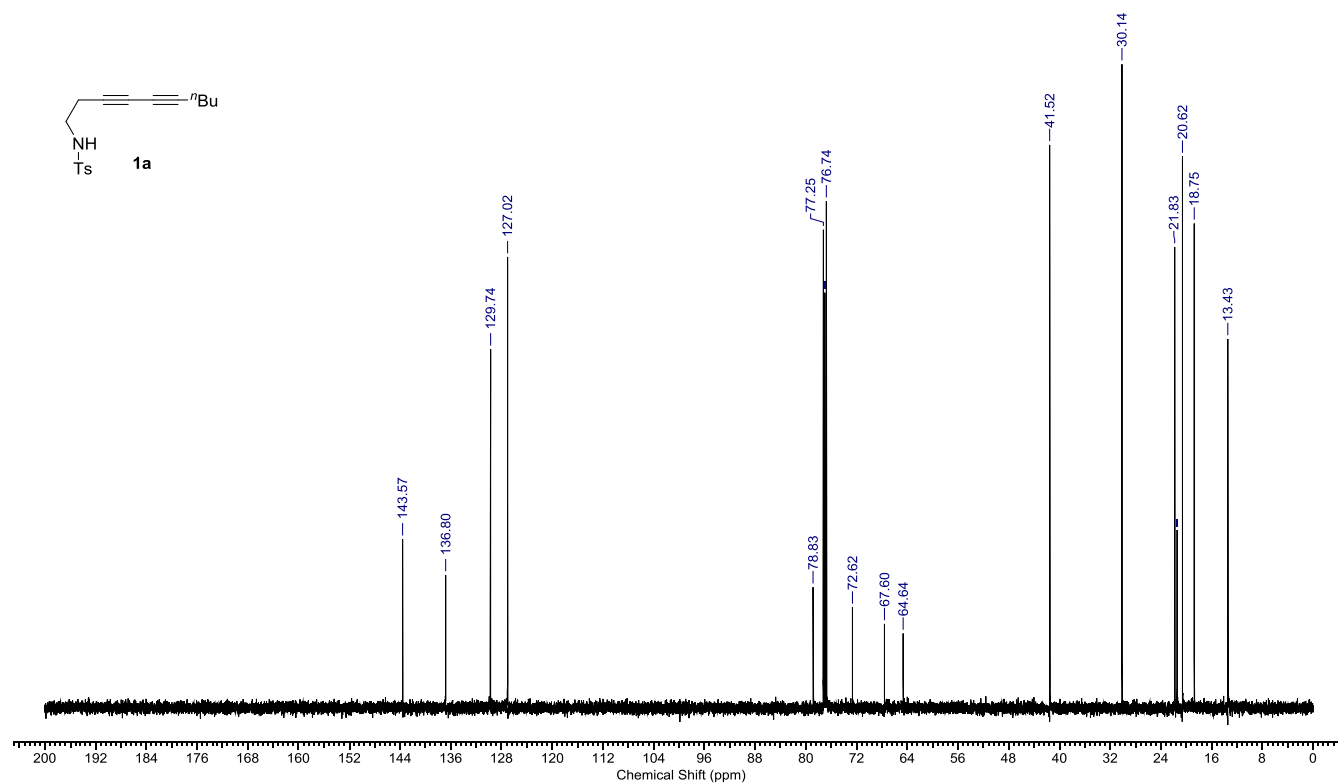

### $^1\text{H}$ NMR of **1b**

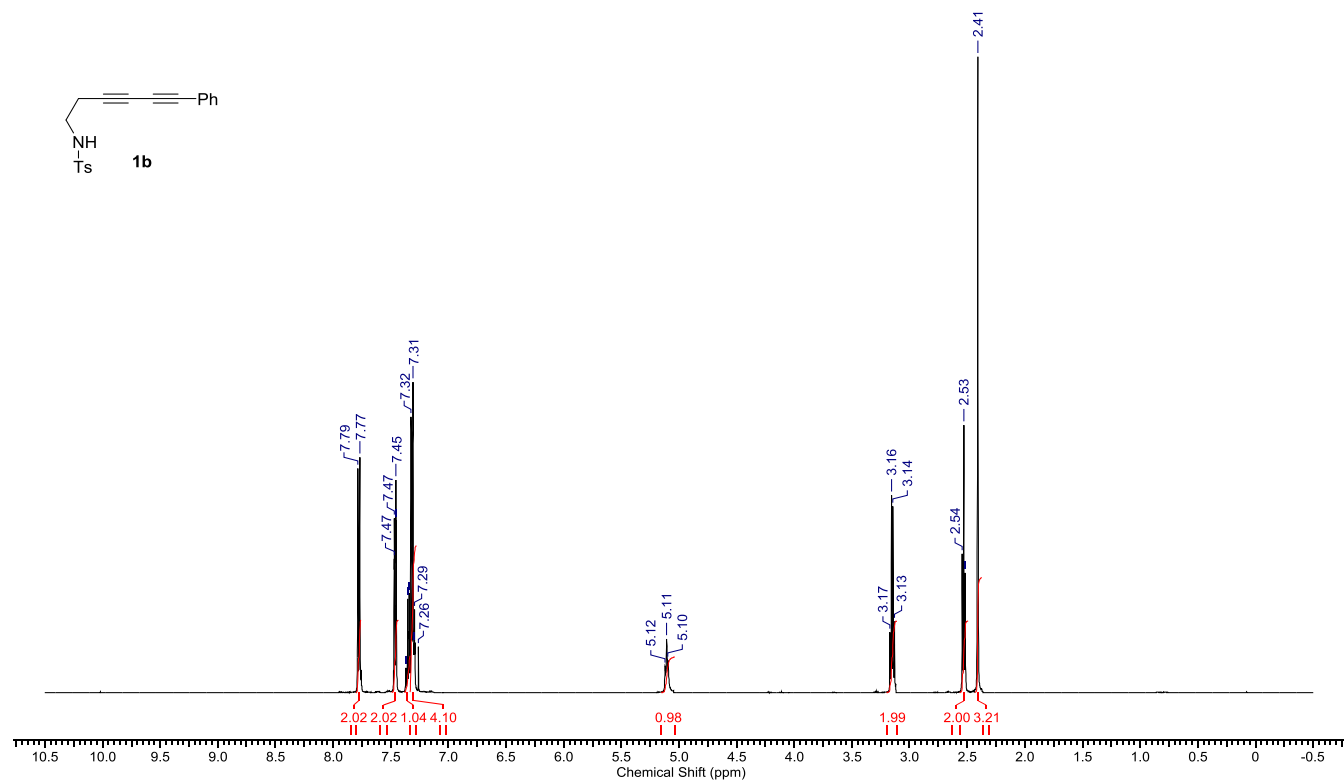

### $^{13}\text{C}$ NMR of **1b**

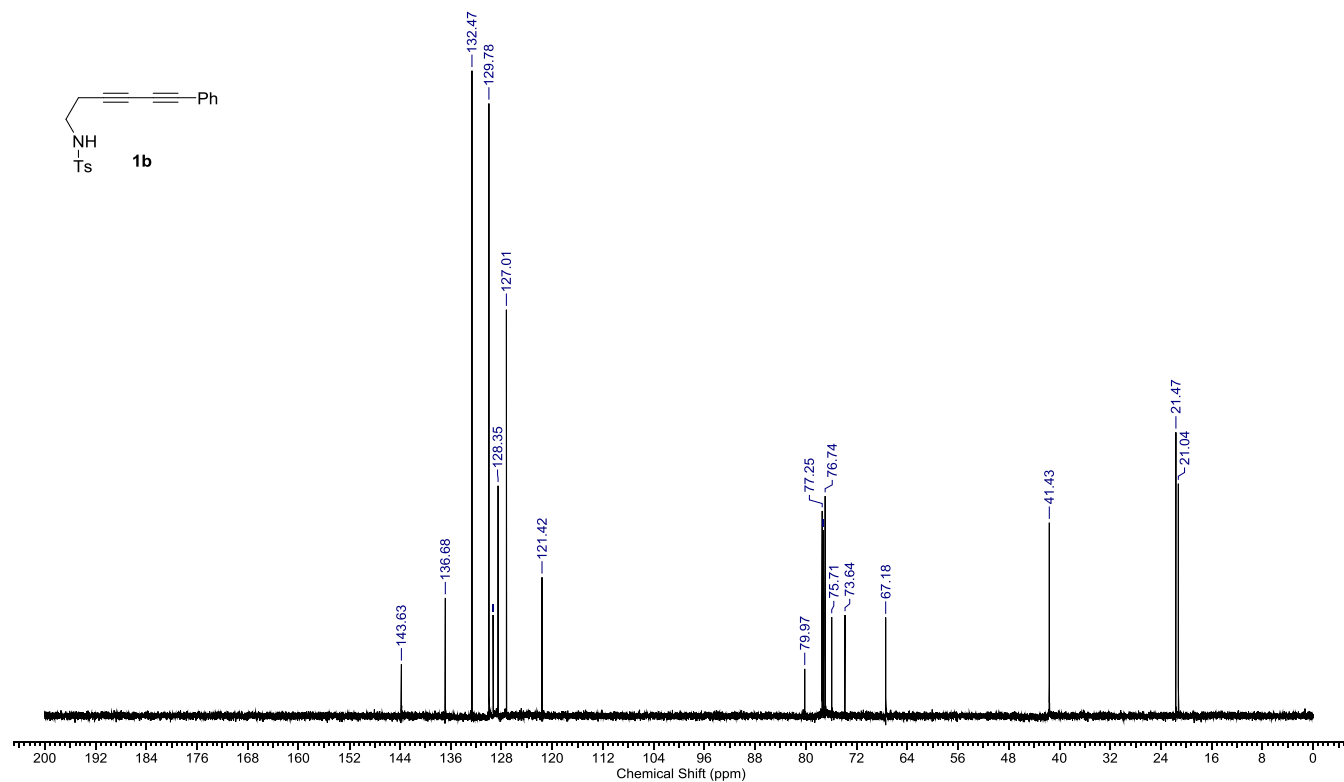

### <sup>1</sup>H NMR of *E*-3aa

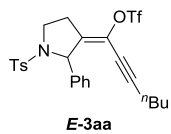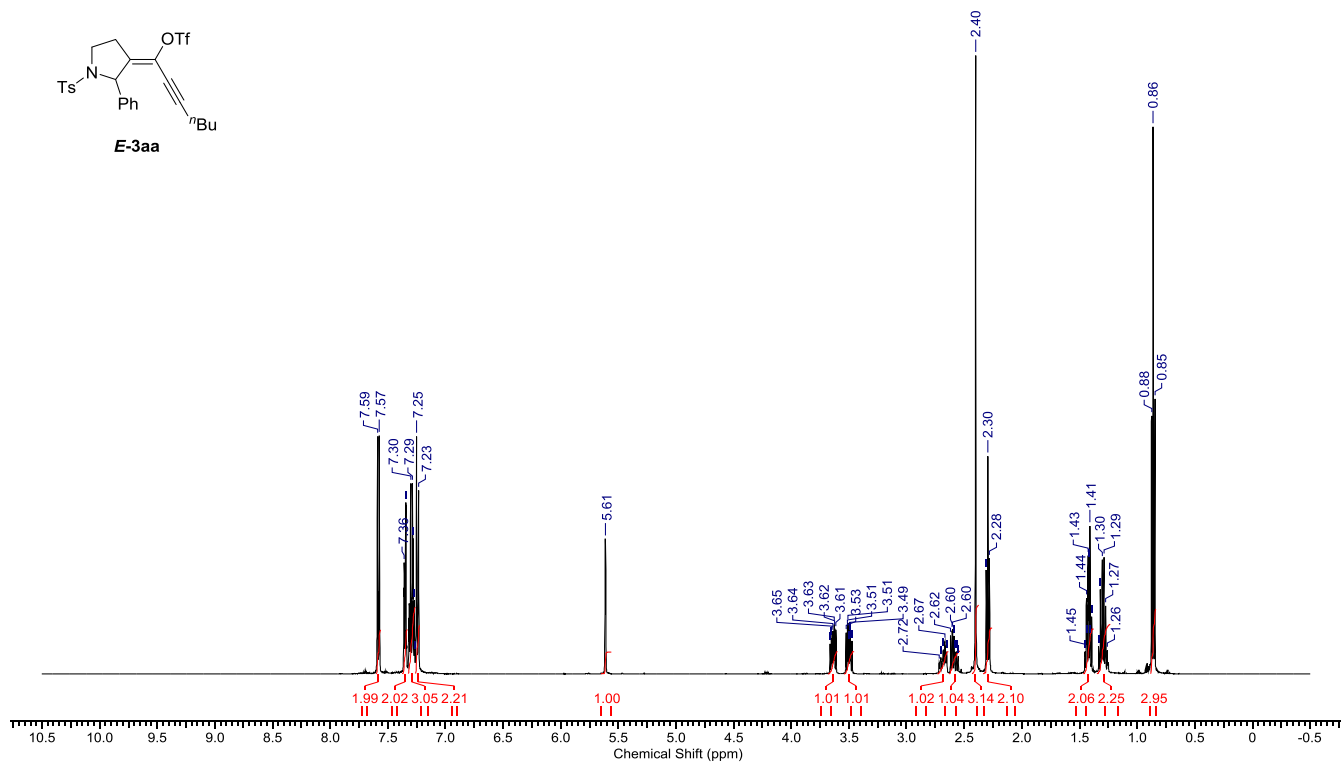

### <sup>13</sup>C NMR of *E*-3aa

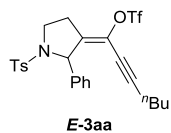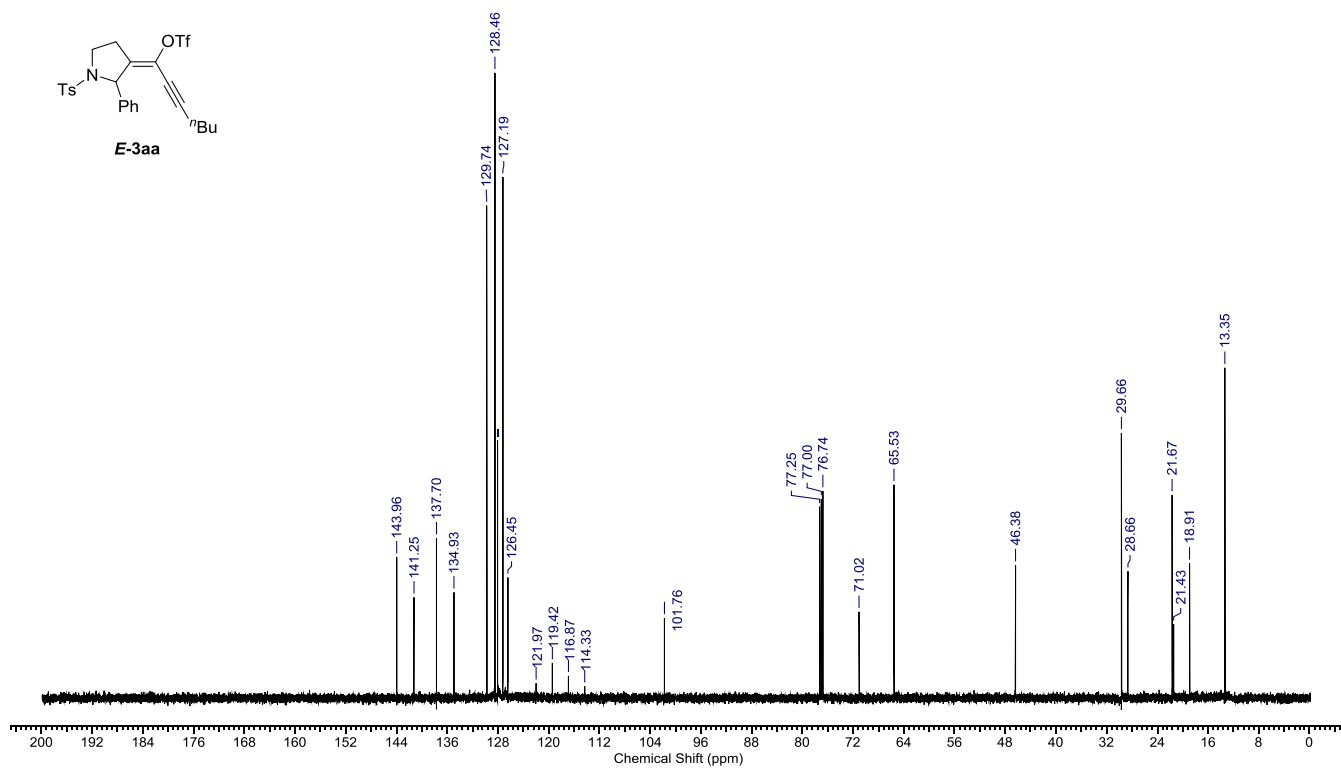

### <sup>1</sup>H NMR of **Z-3aa**

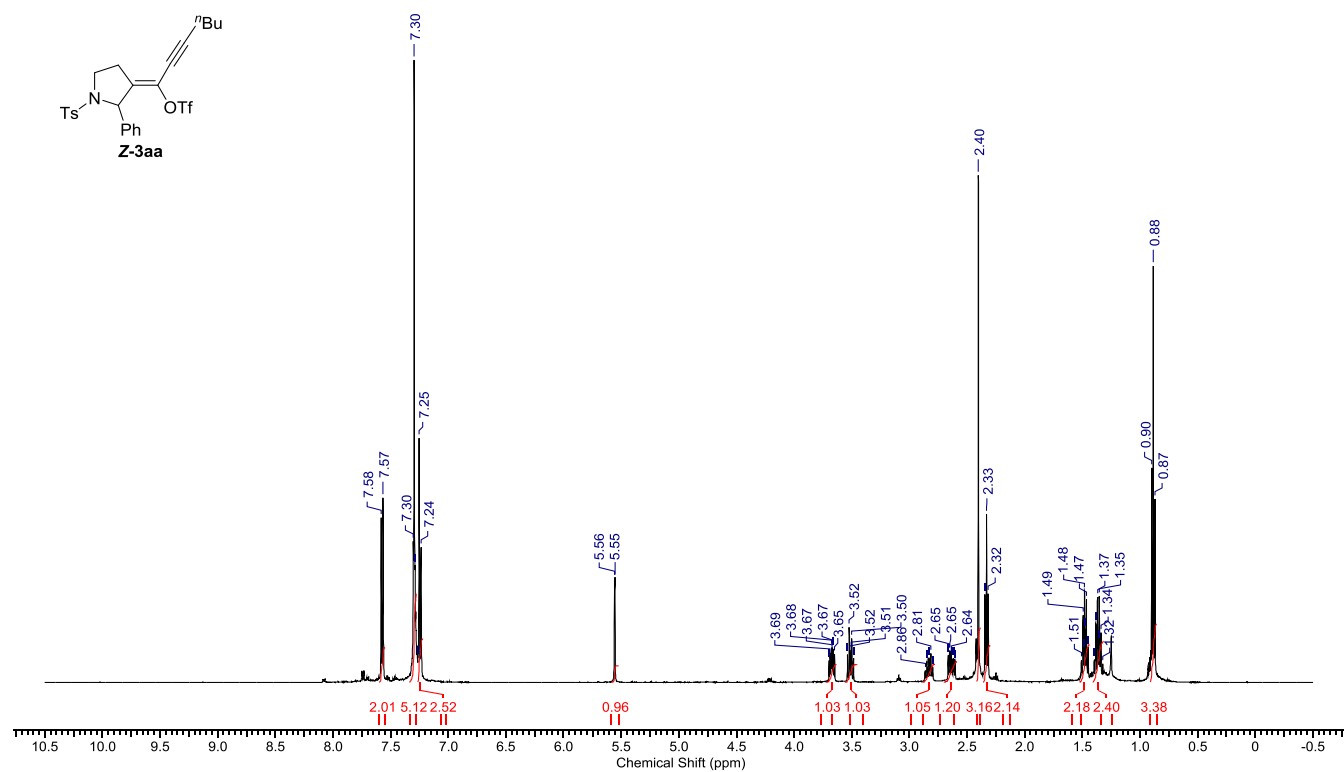

### <sup>13</sup>C NMR of **Z-3aa**

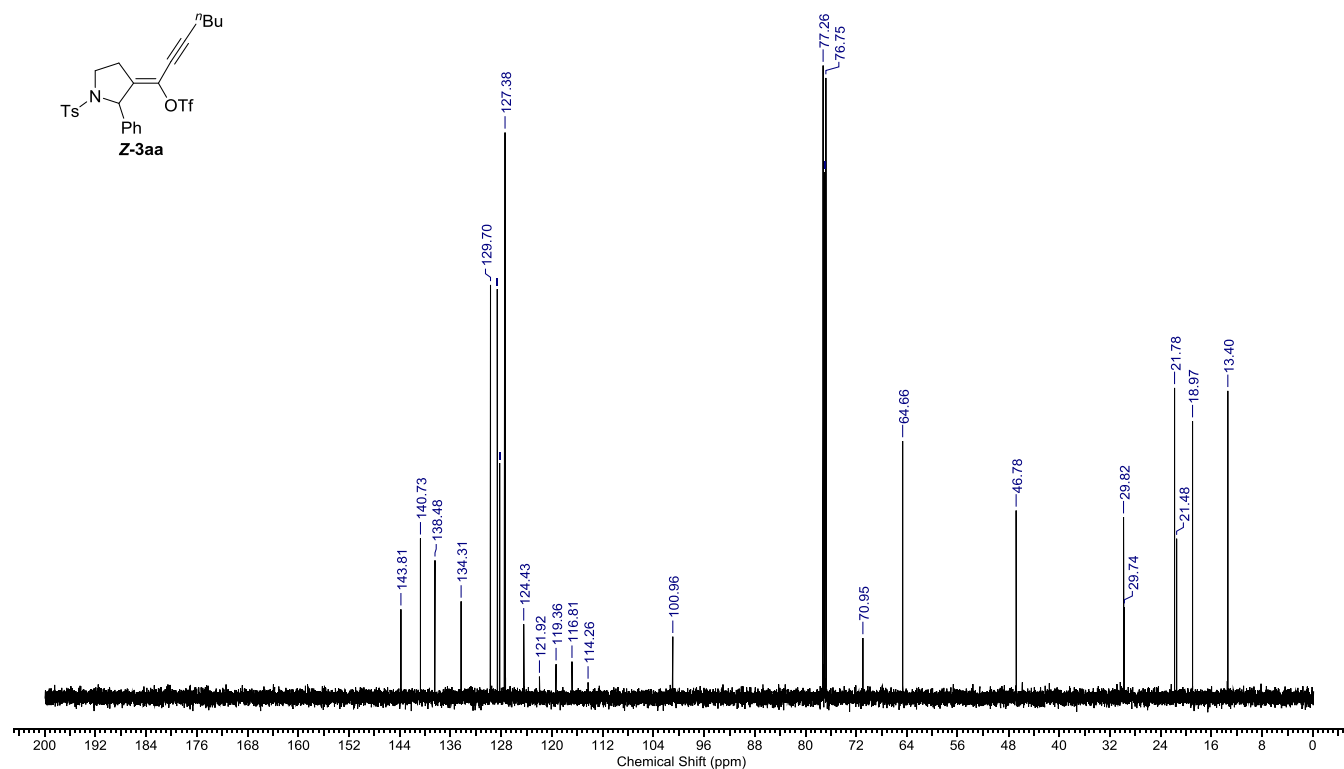



### $^1\text{H}$ NMR of *E*-3ab

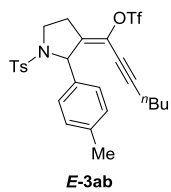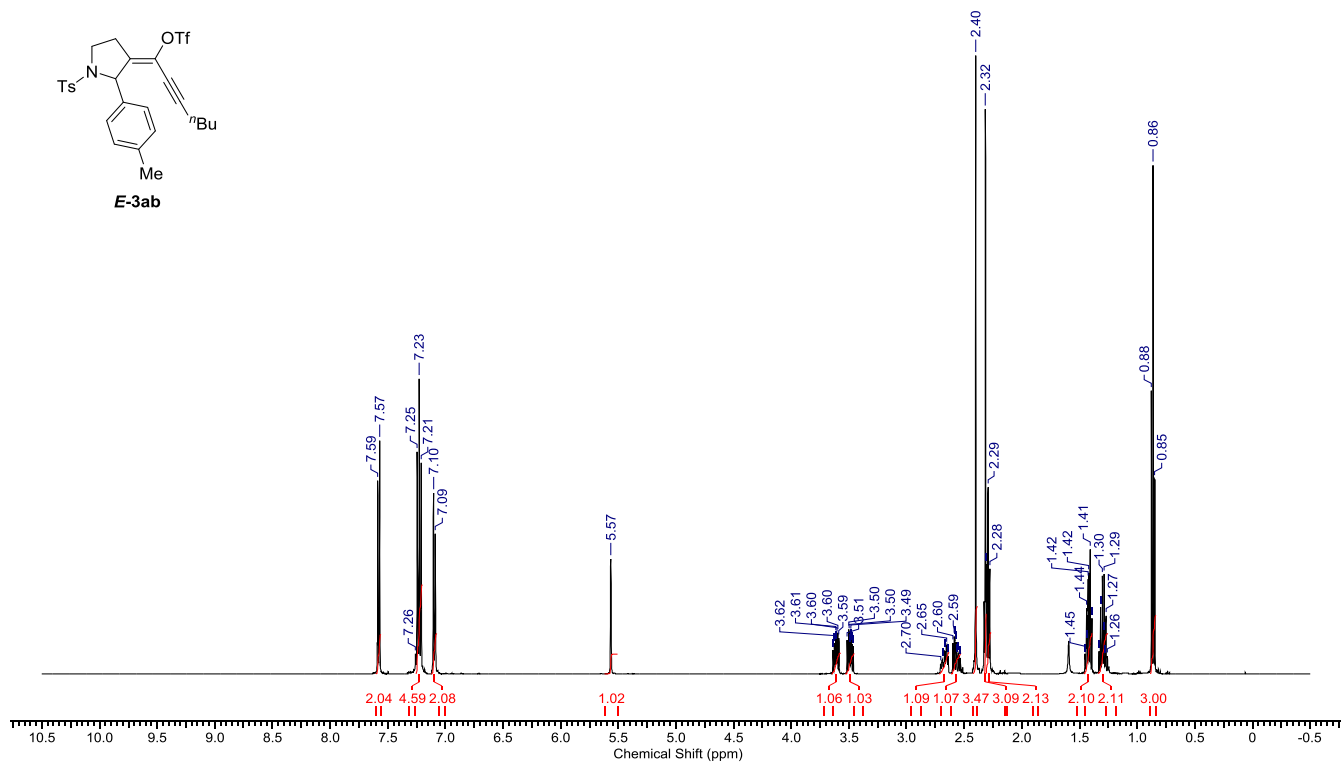

### $^{13}\text{C}$ NMR of *E*-3ab

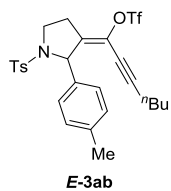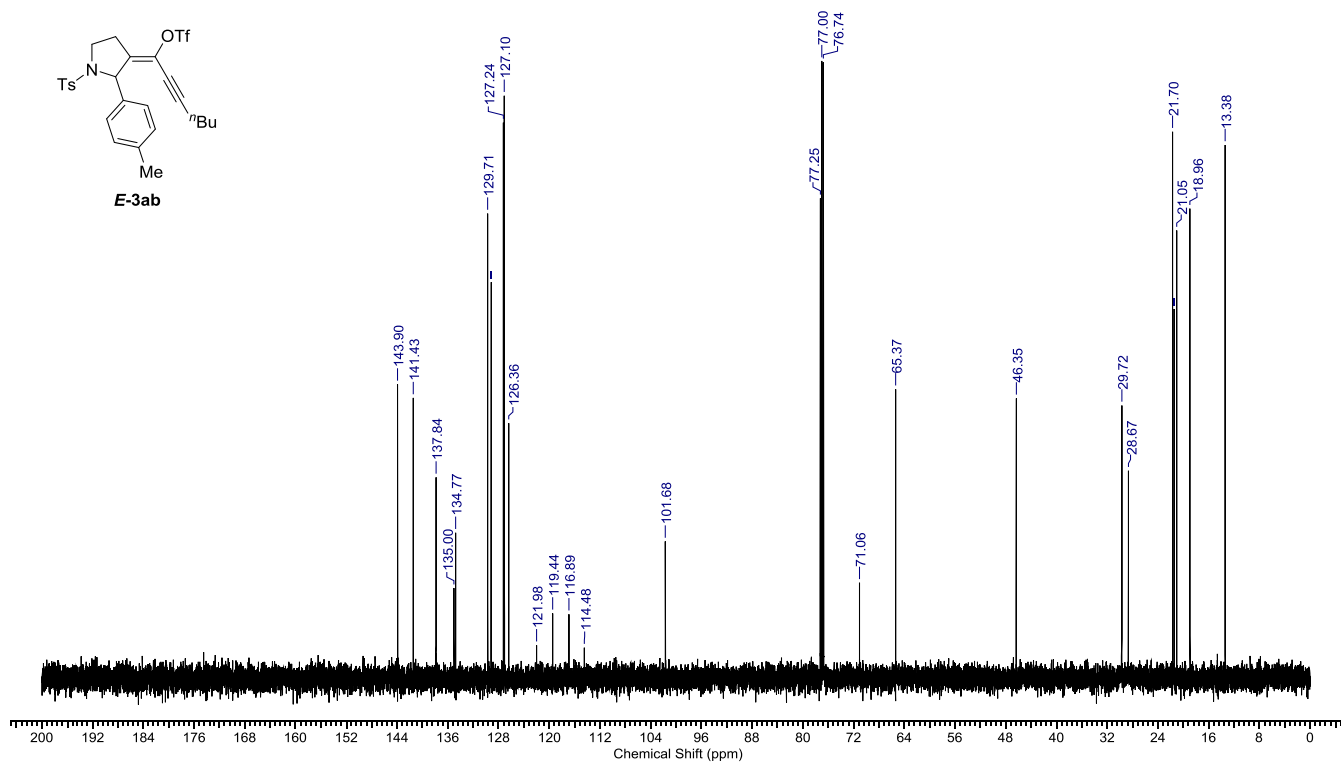

### <sup>1</sup>H NMR of Z-3ab

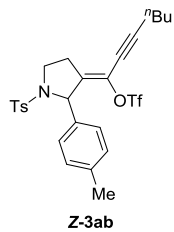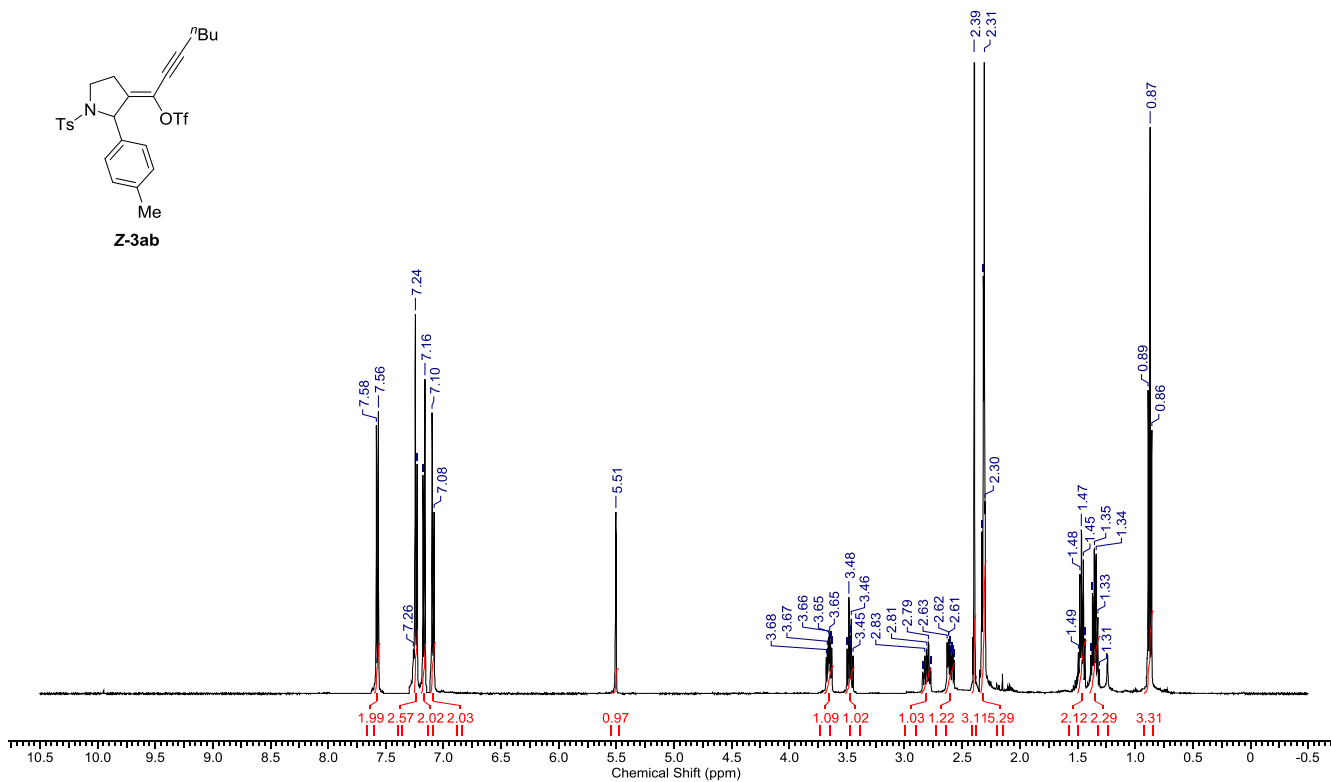

### <sup>13</sup>C NMR of Z-3ab

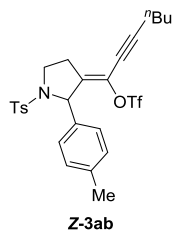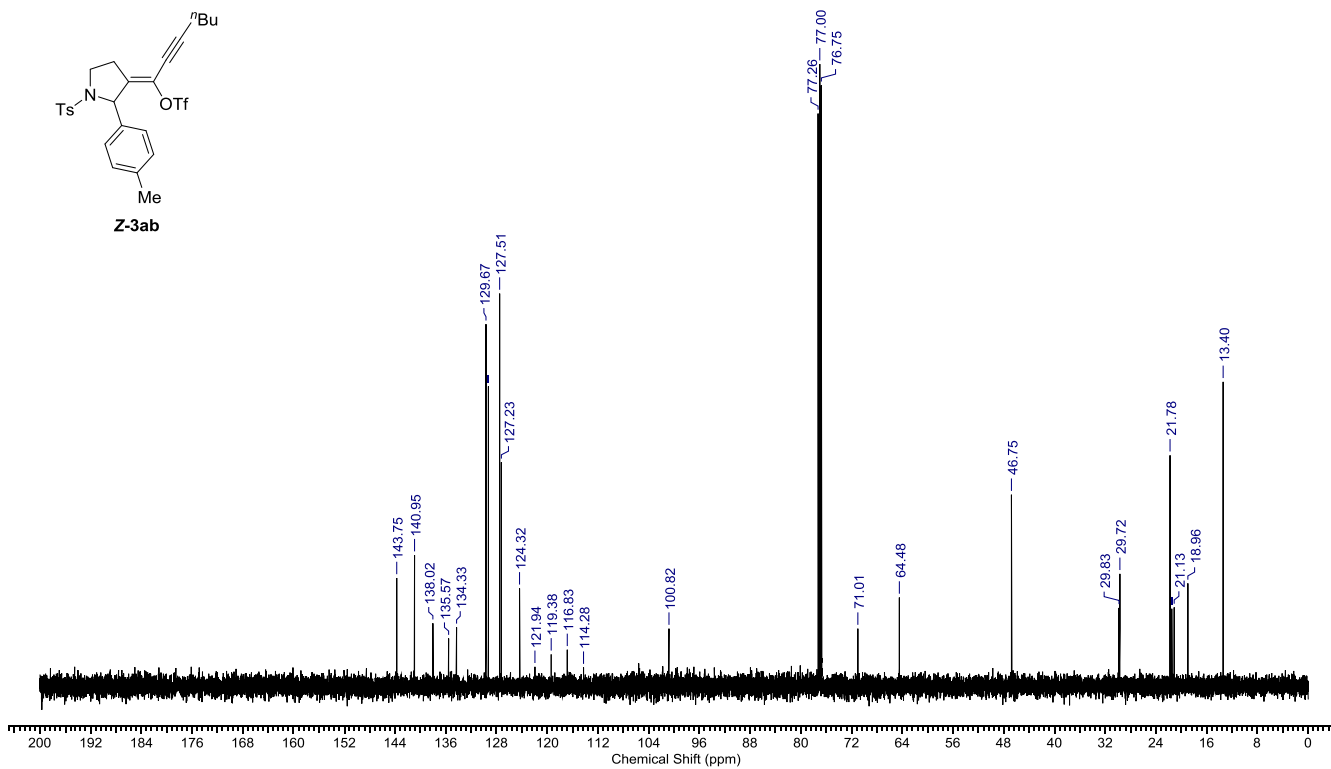

### $^1\text{H}$ NMR of *E*-3ac

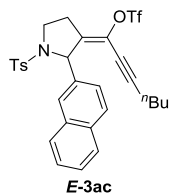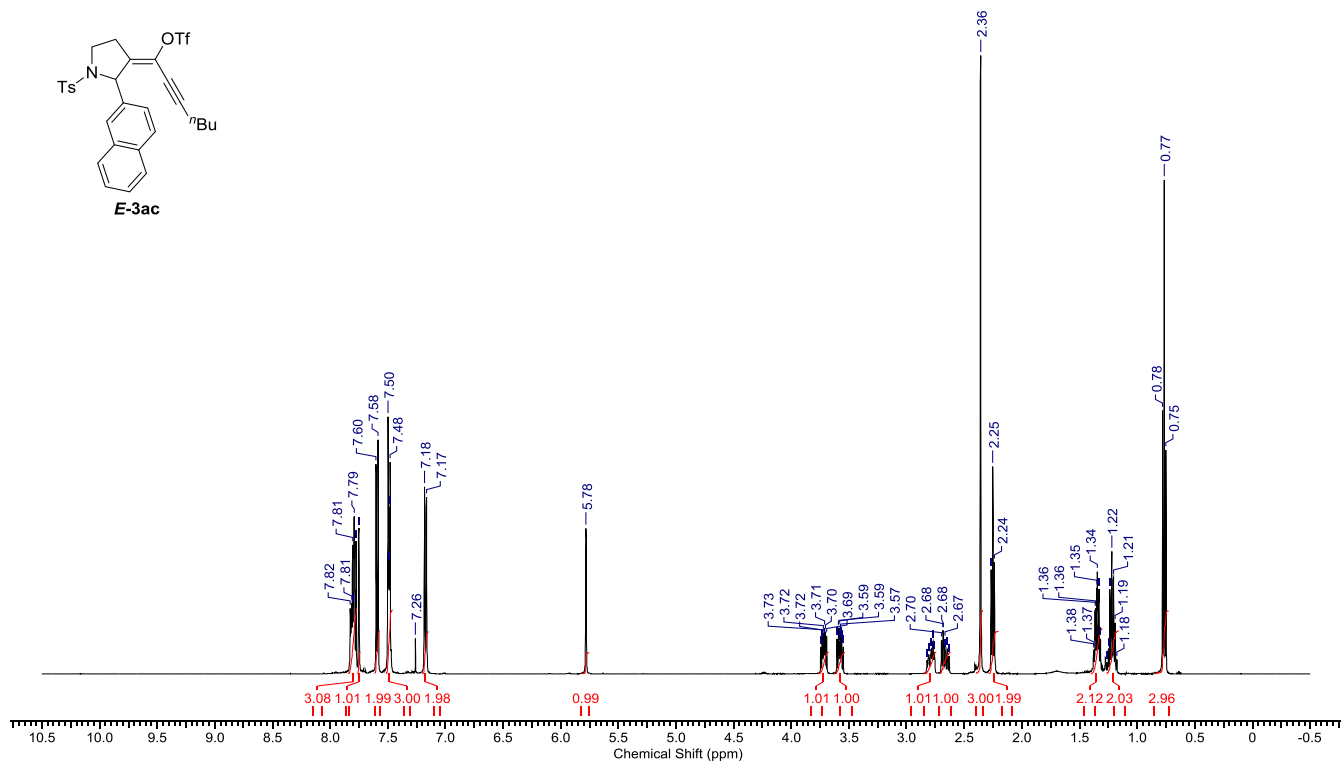

### $^{13}\text{C}$ NMR of *E*-3ac

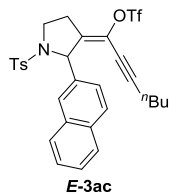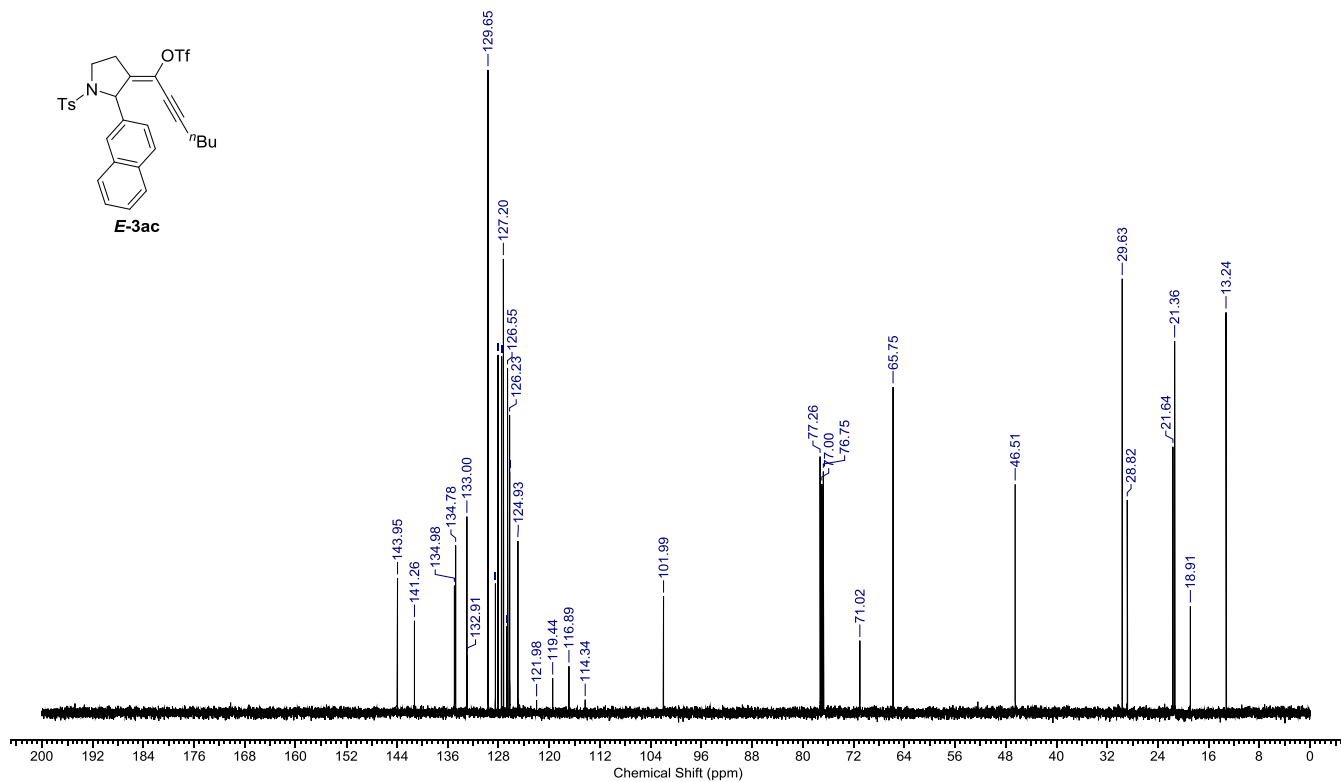

### <sup>1</sup>H NMR of **Z-3ac**

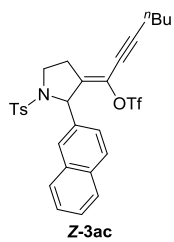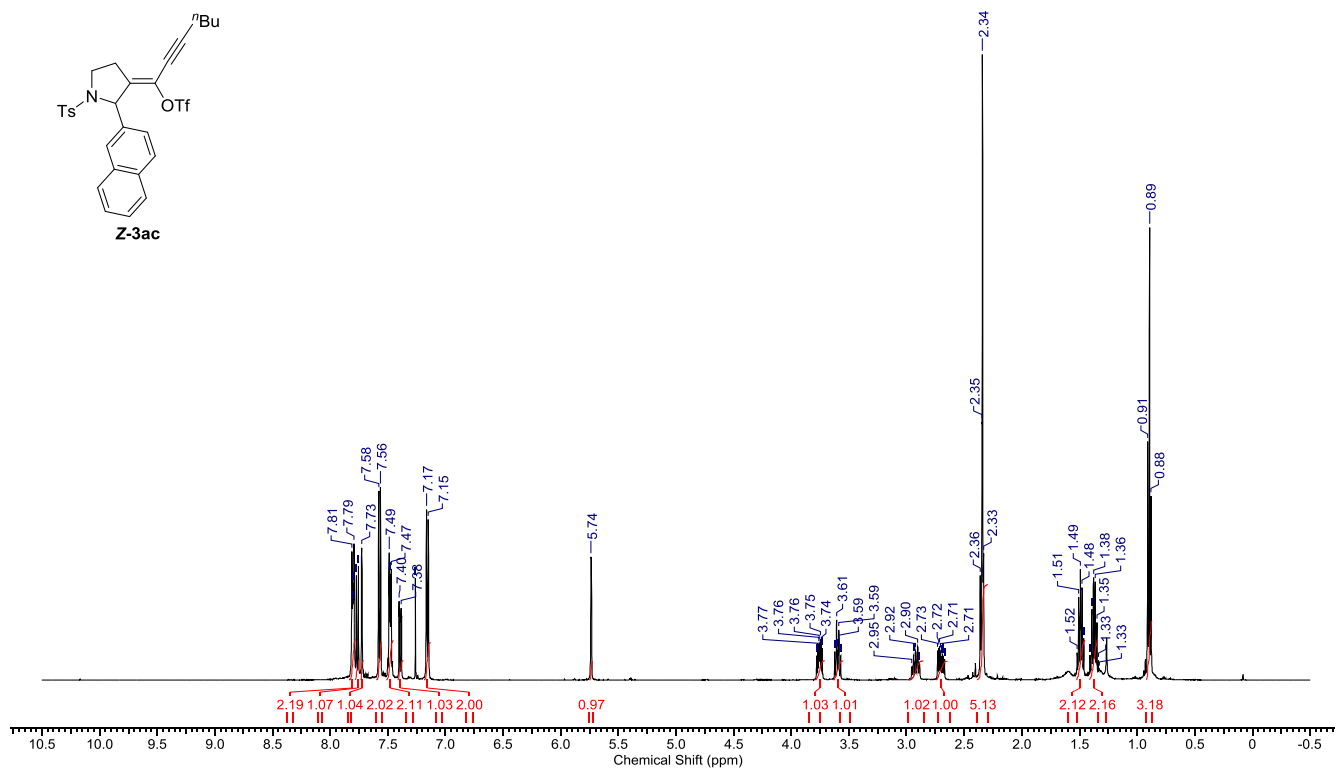

### <sup>13</sup>C NMR of **Z-3ac**

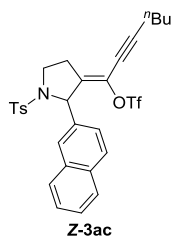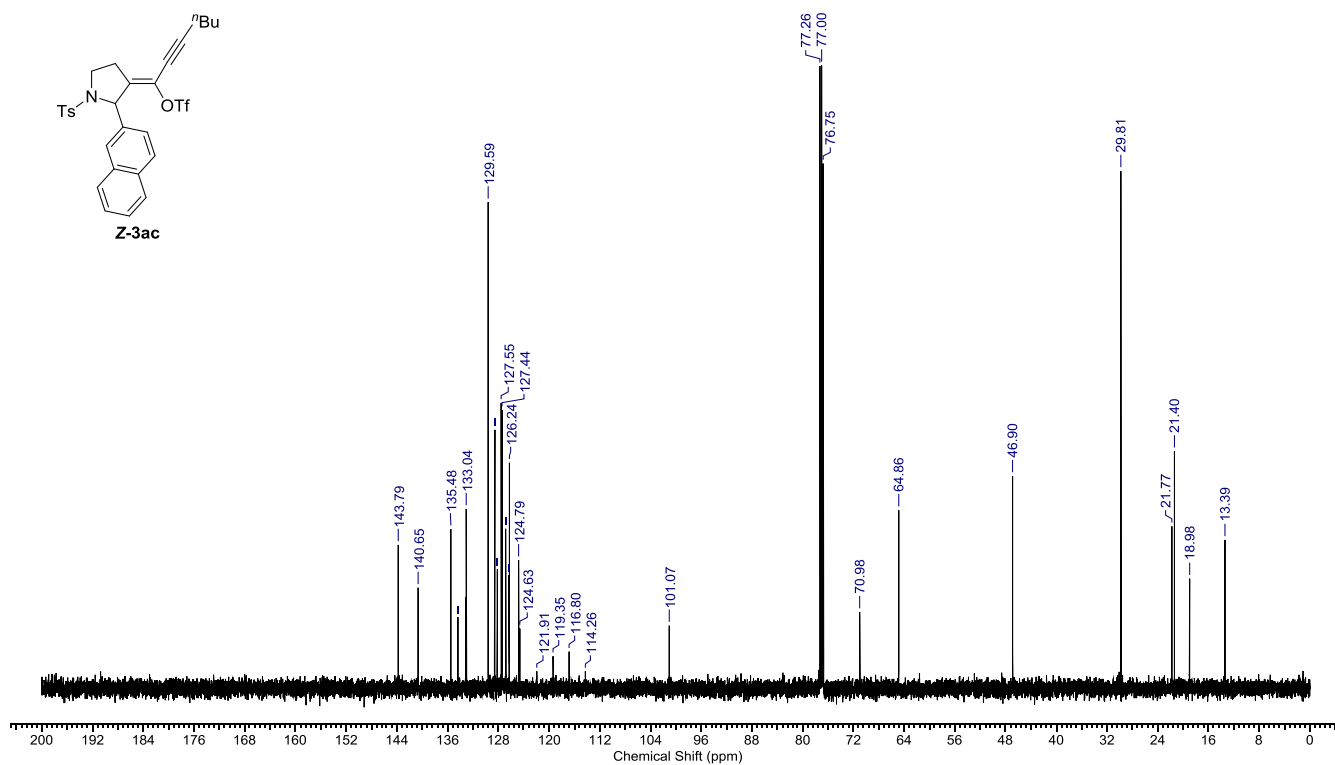

### $^1\text{H}$ NMR of *E*-3ad

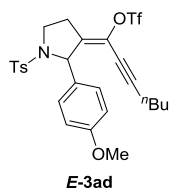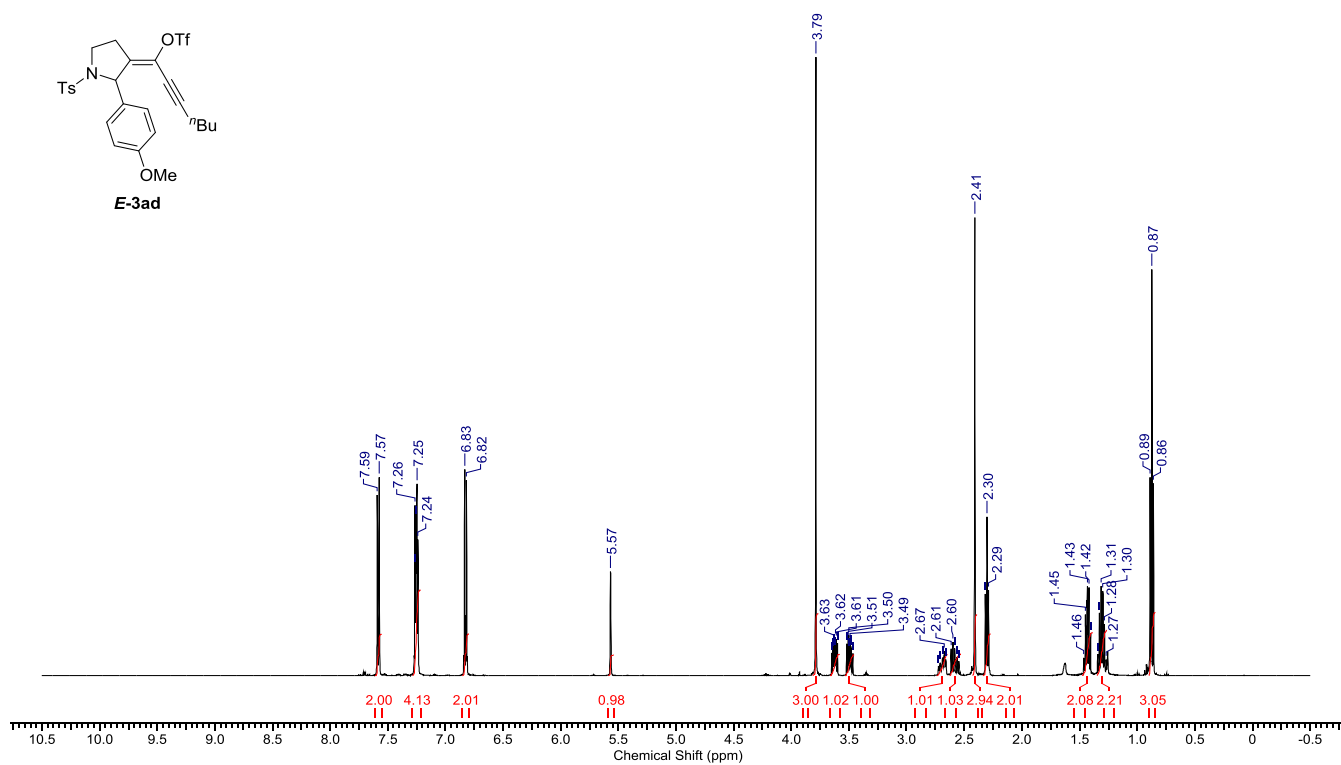

### $^{13}\text{C}$ NMR of *E*-3ad

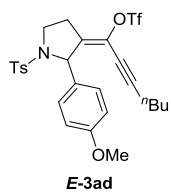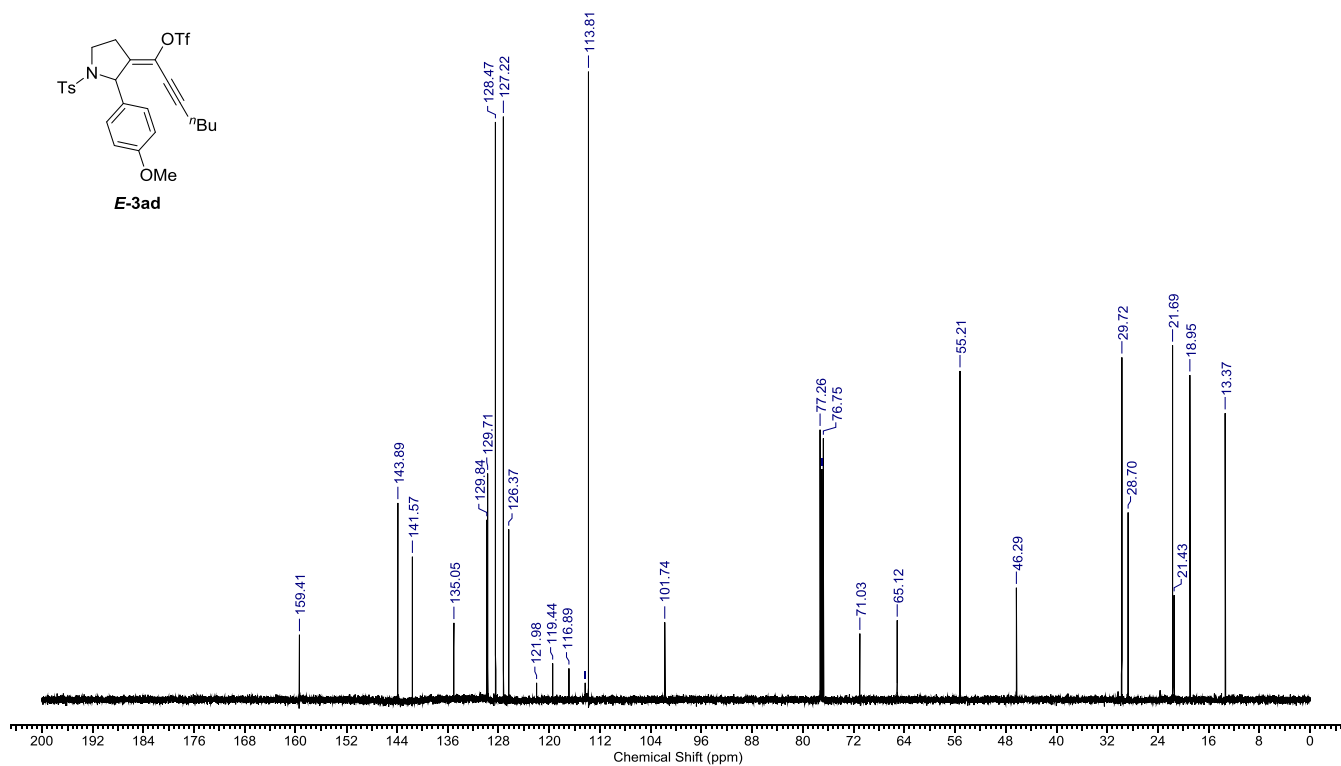

### <sup>1</sup>H NMR of **Z-3ad**

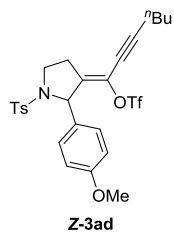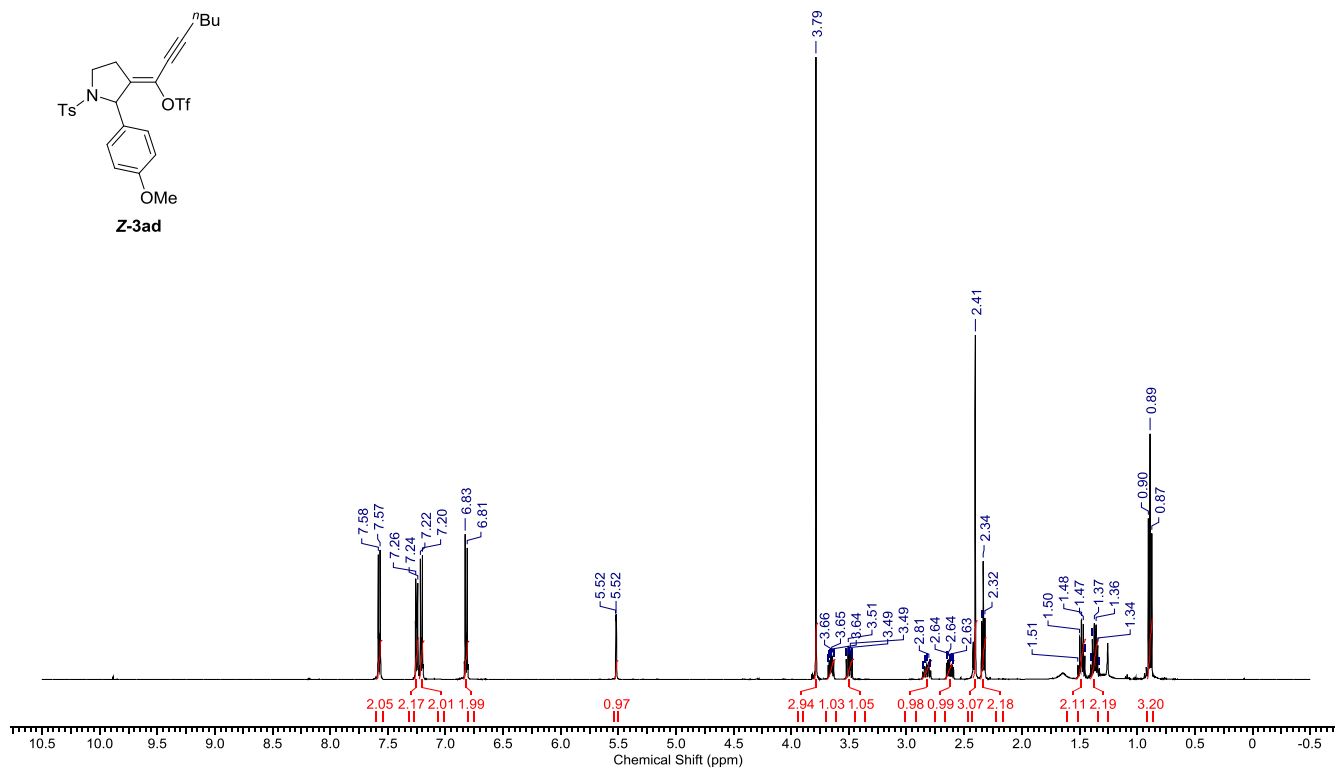

### <sup>13</sup>C NMR of **Z-3ad**

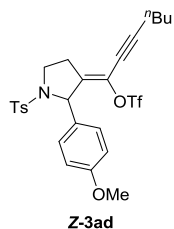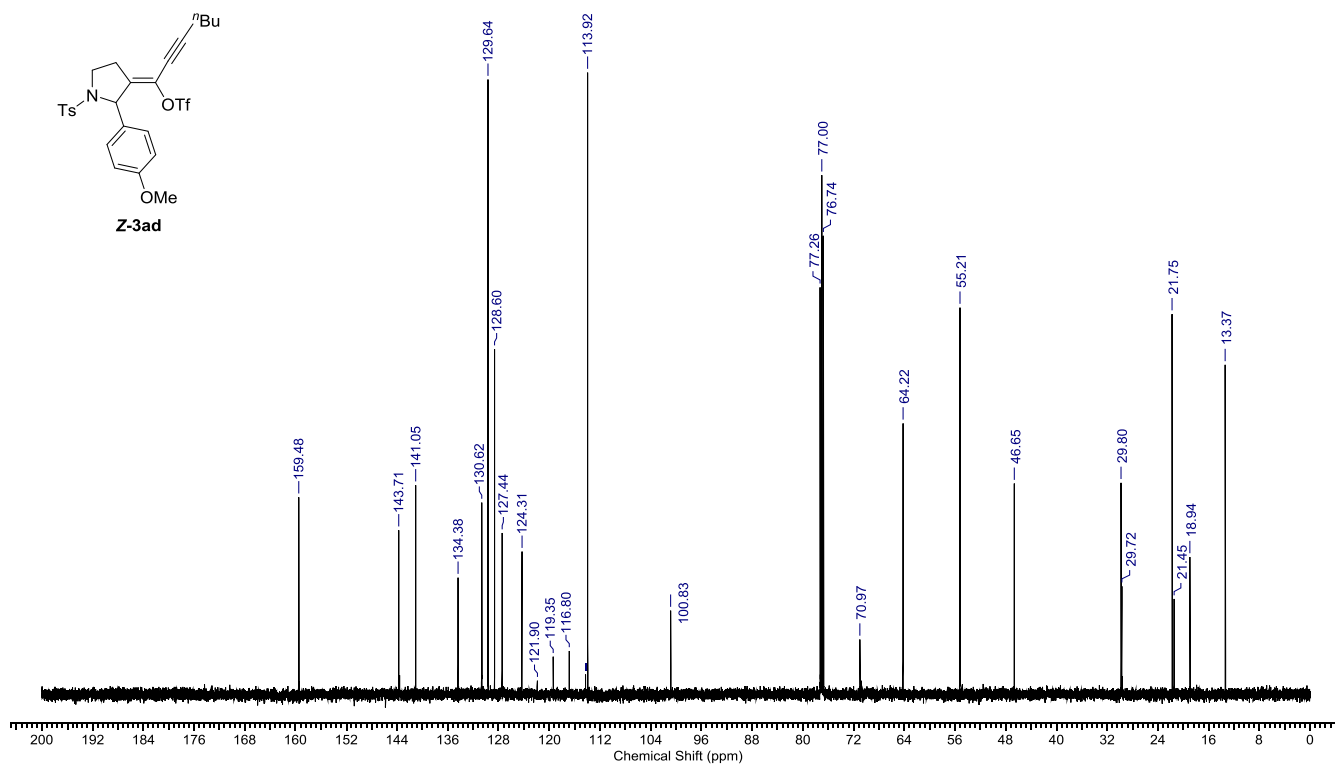

### $^1\text{H}$ NMR of *E*-3ae

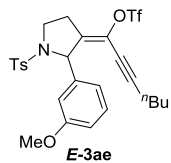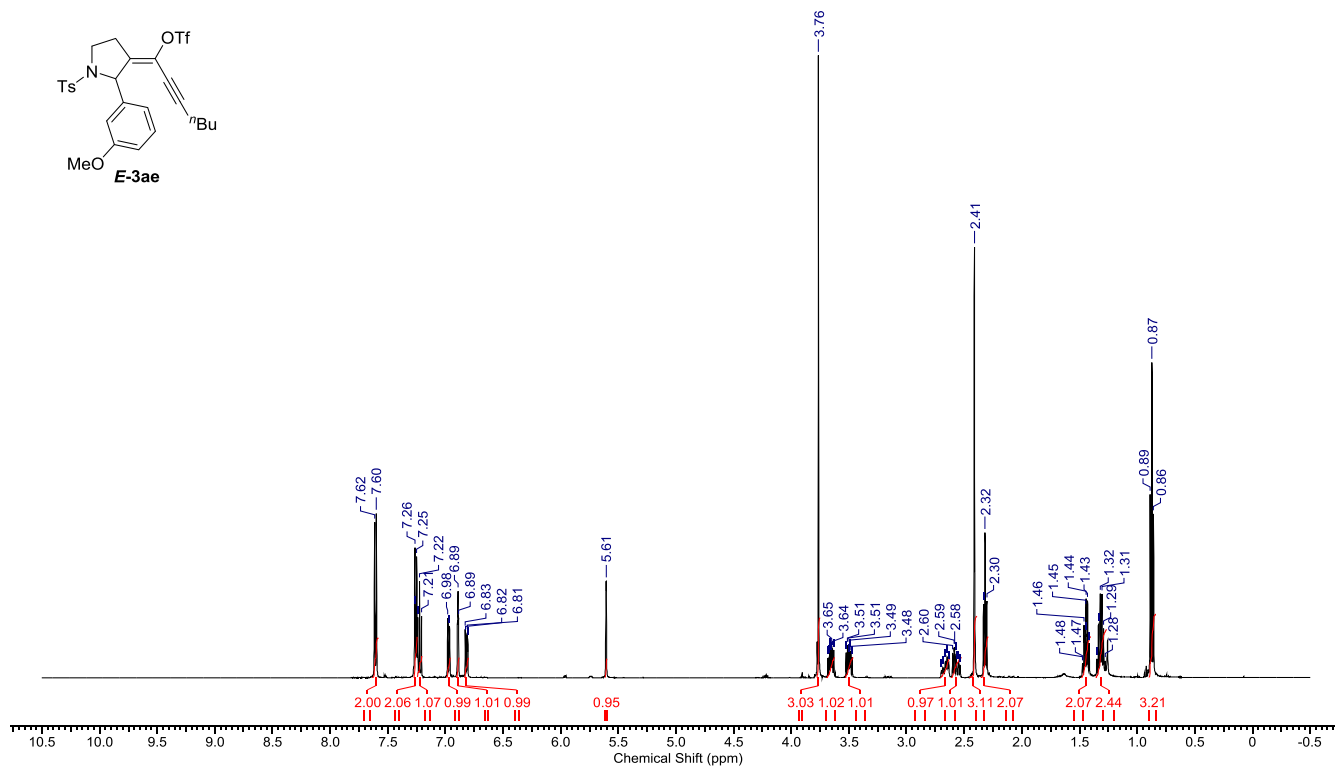

### $^{13}\text{C}$ NMR of *E*-3ae

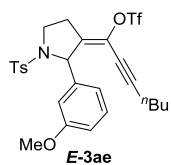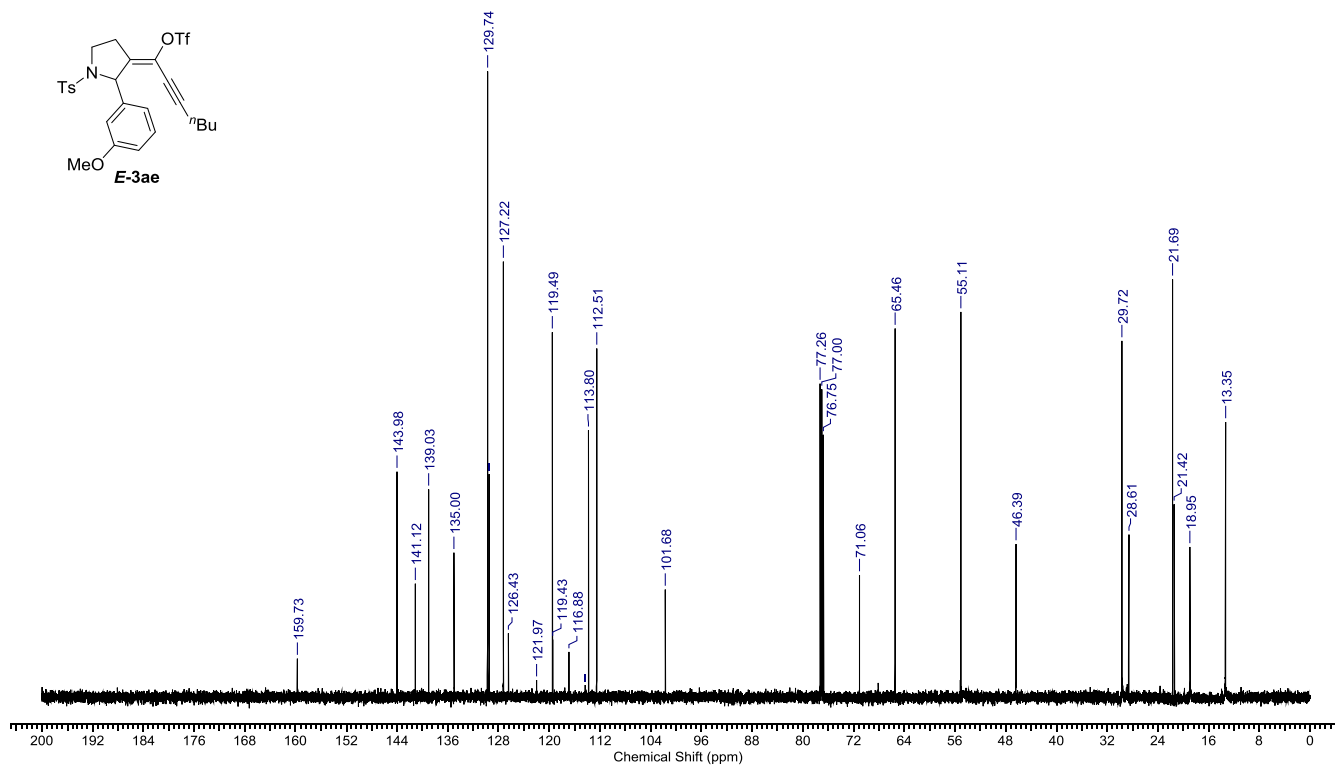

### <sup>1</sup>H NMR of Z-3ae

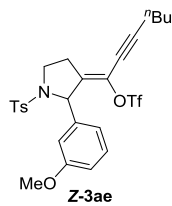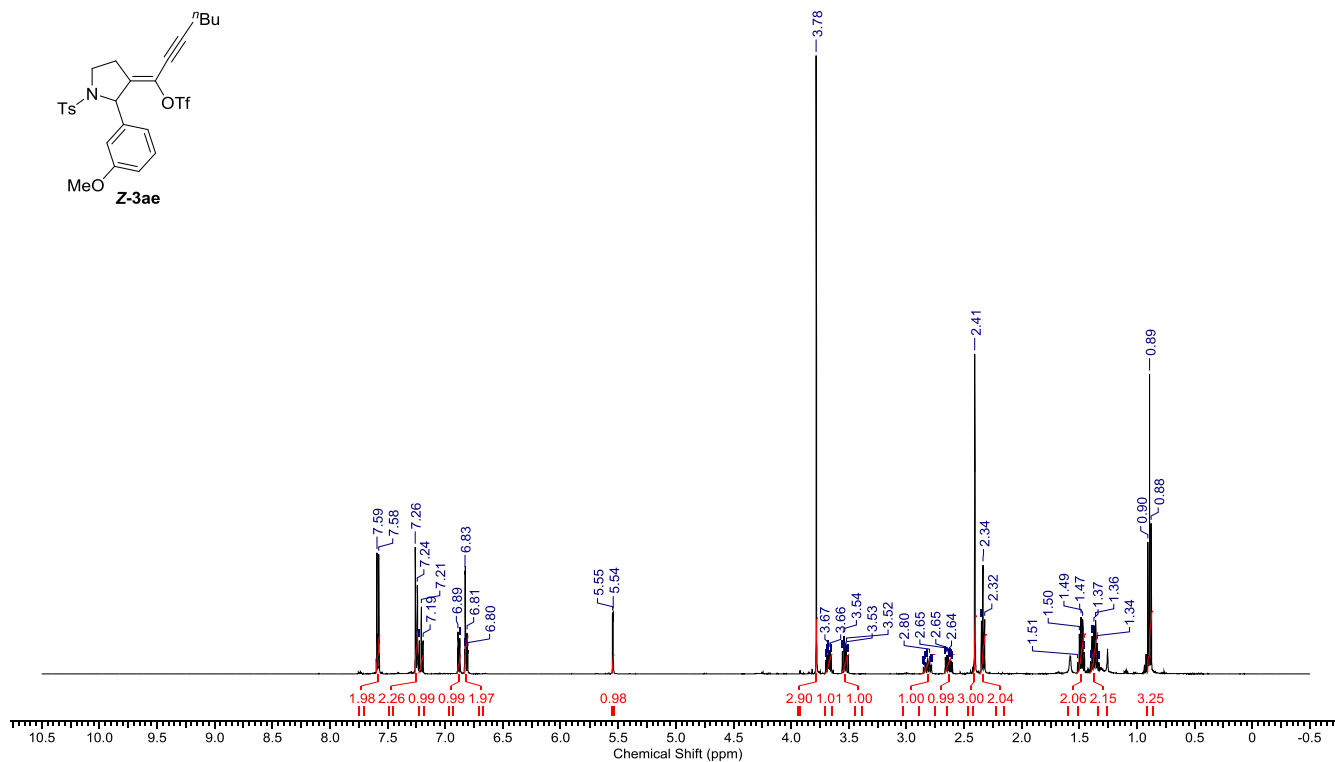

### <sup>13</sup>C NMR of Z-3ae

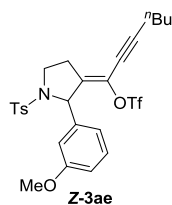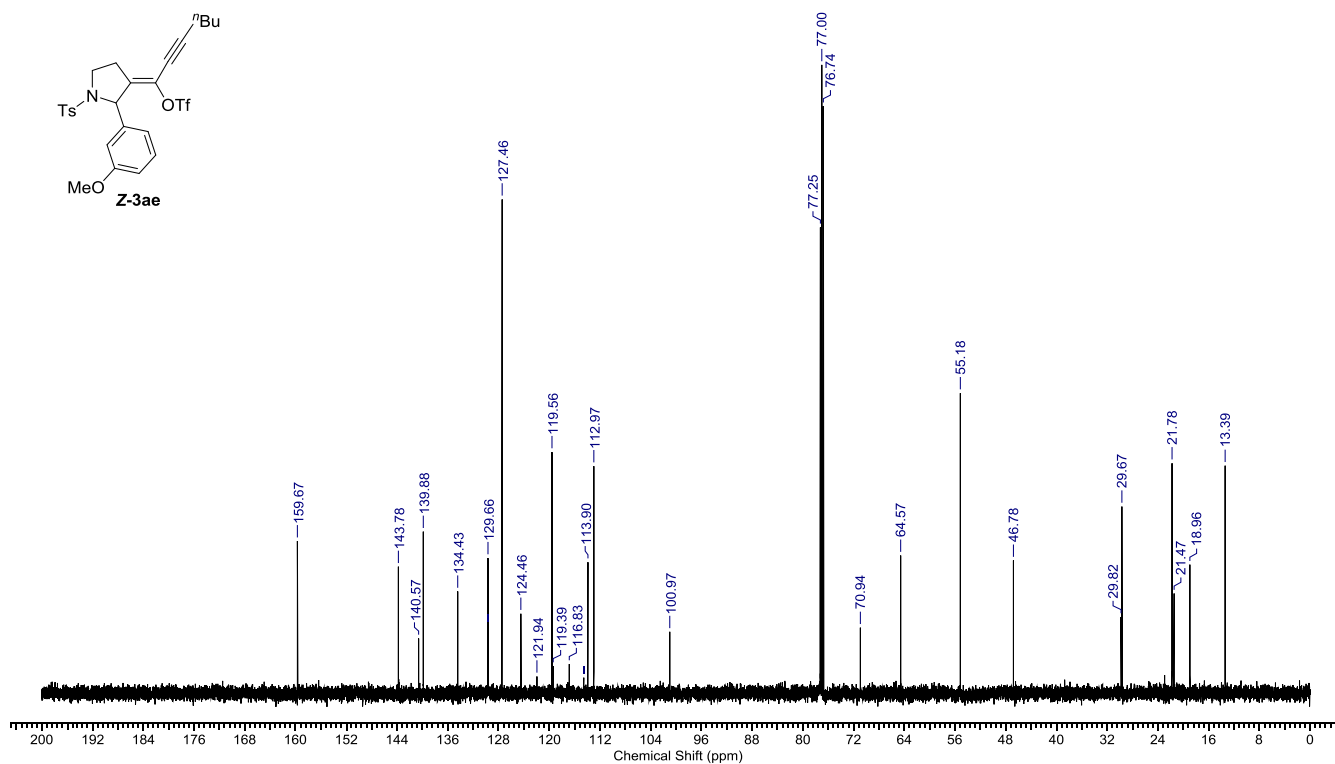



### $^1\text{H}$ NMR of *E*-3af

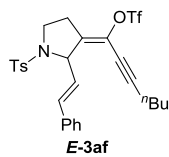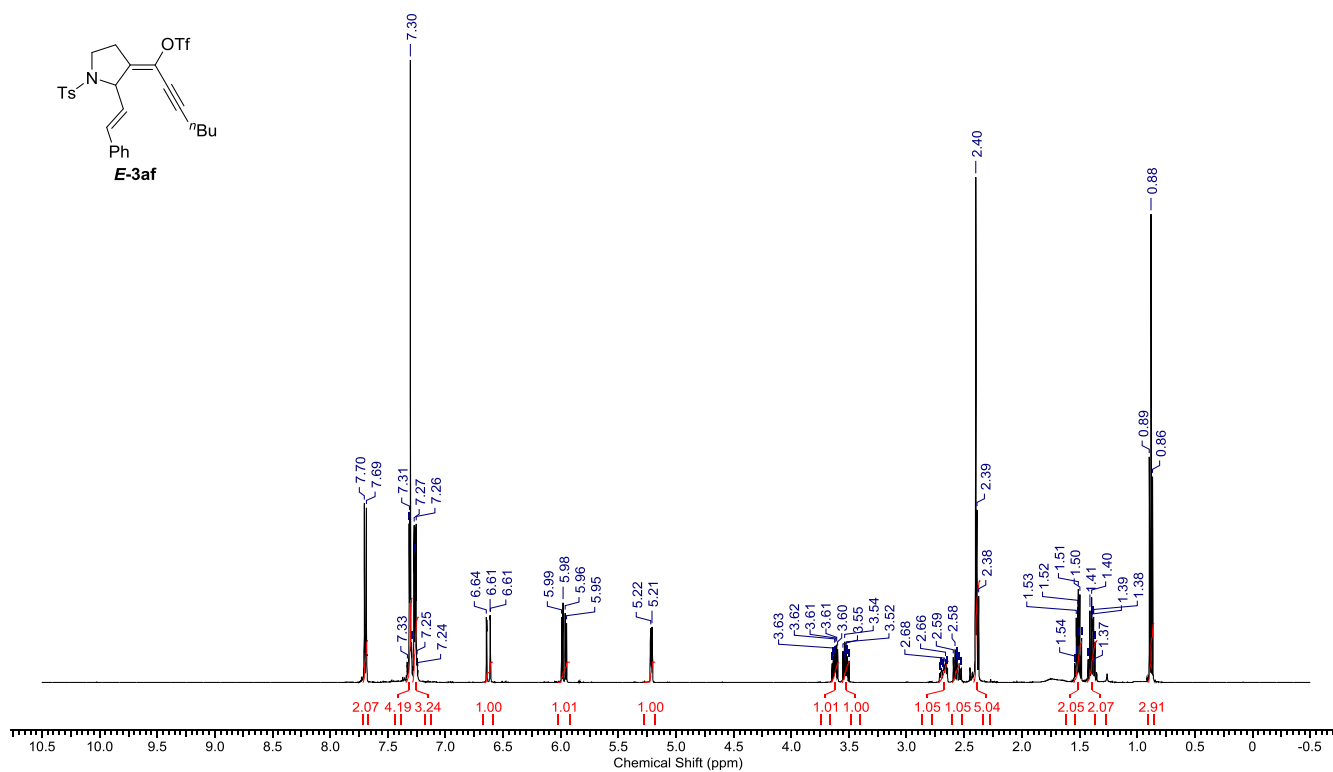

### $^{13}\text{C}$ NMR of *E*-3af

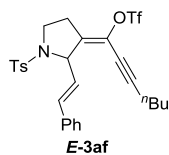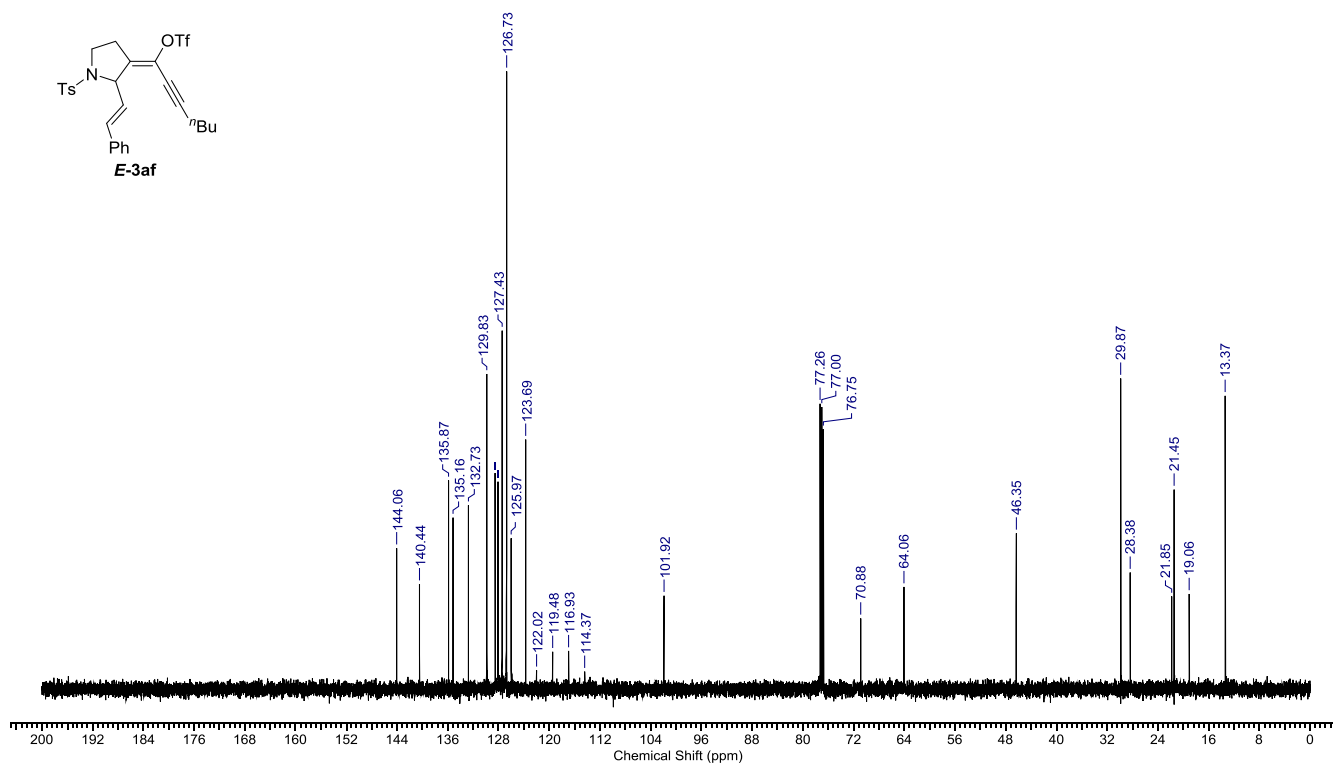

### <sup>1</sup>H NMR of **Z-3af**

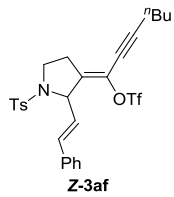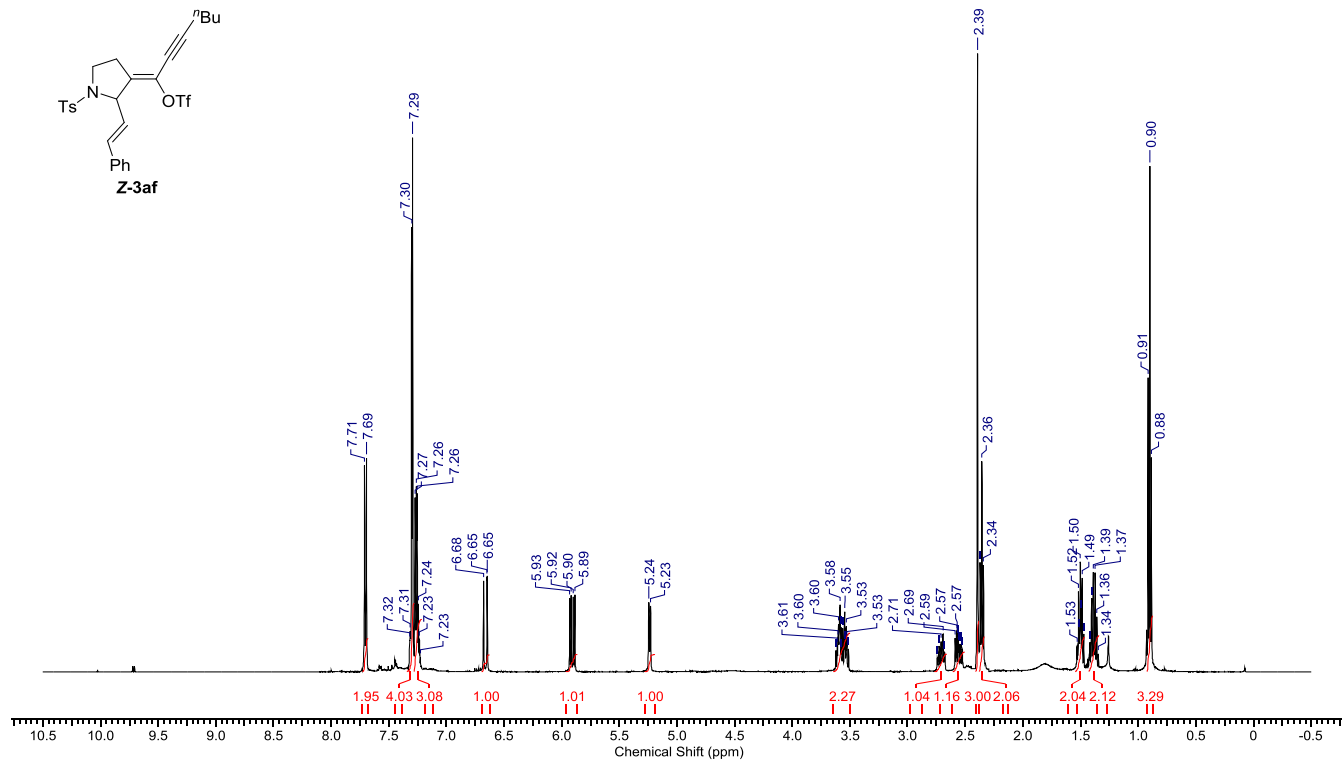

### <sup>13</sup>C NMR of **Z-3af**

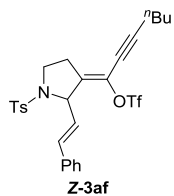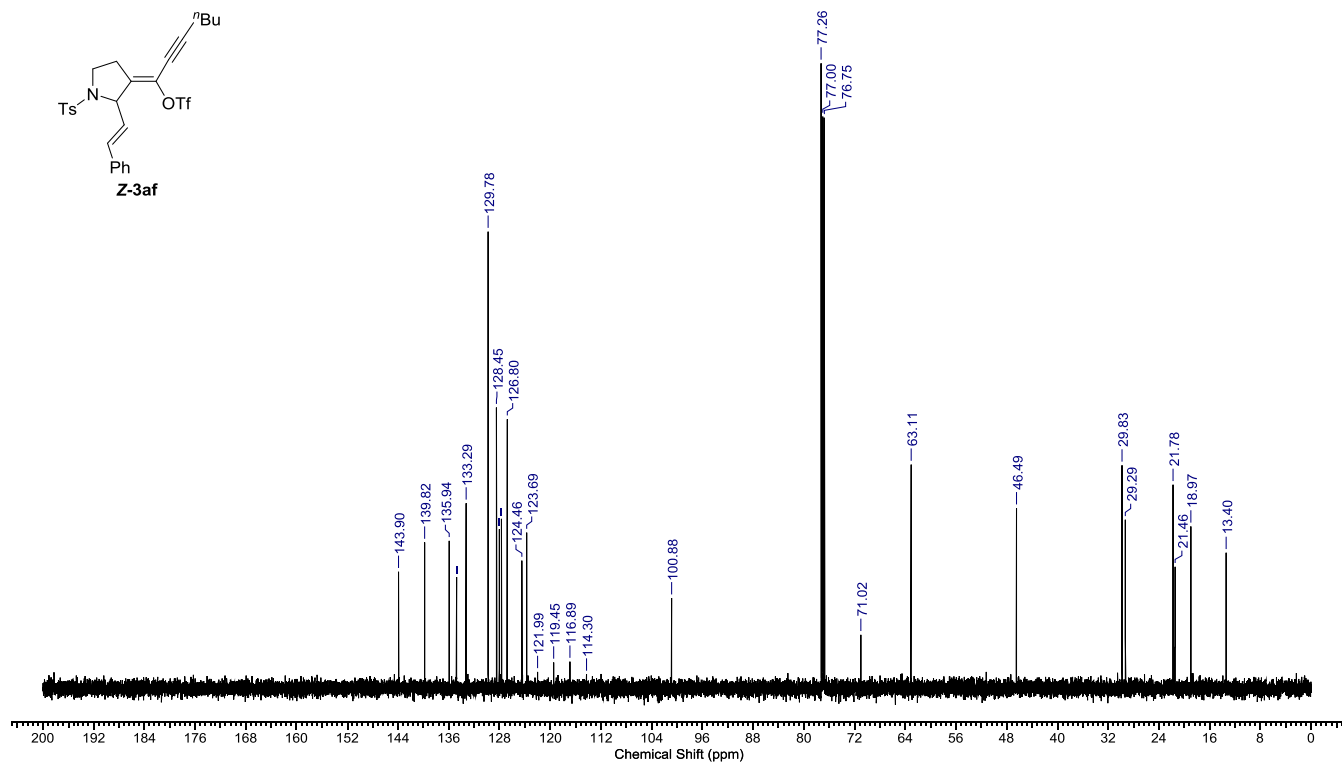

### <sup>1</sup>H NMR of *E*-3ag

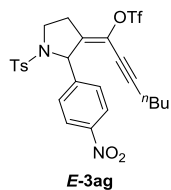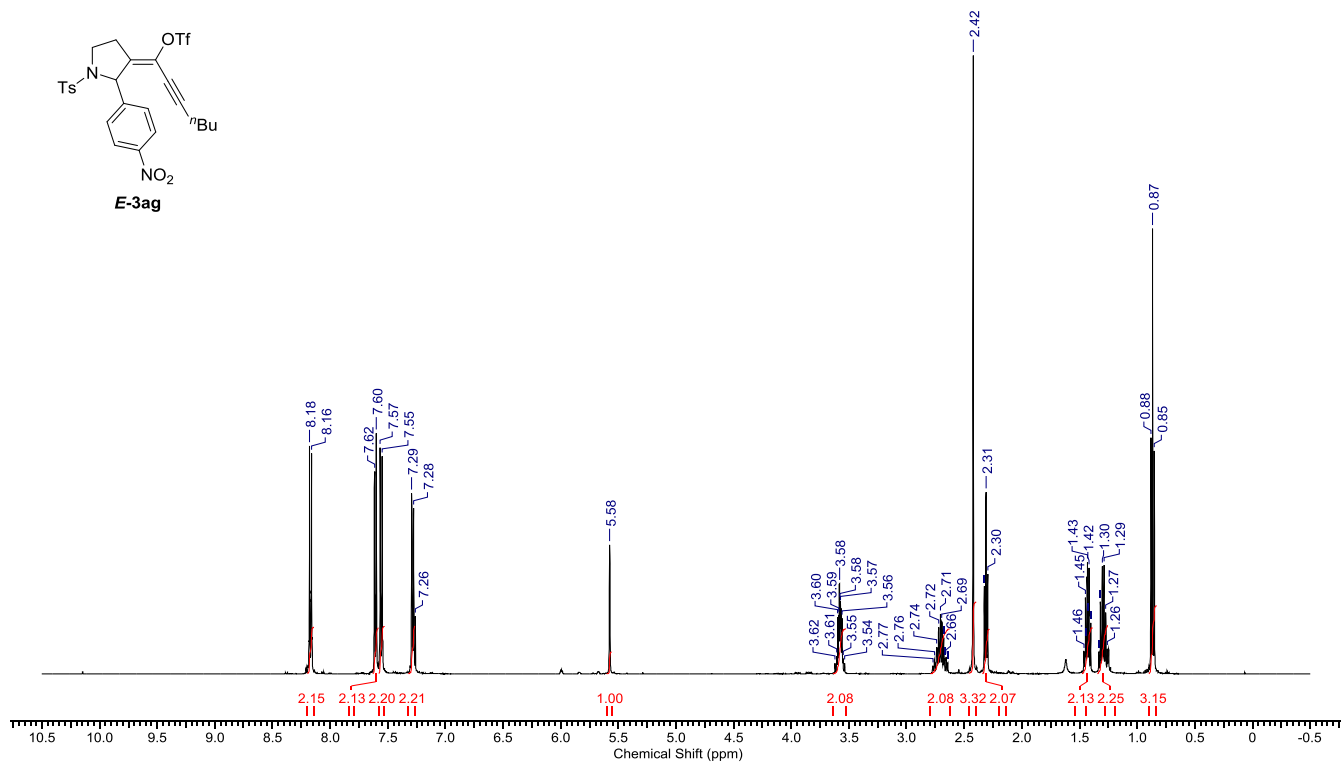

### <sup>13</sup>C NMR of *E*-3ag

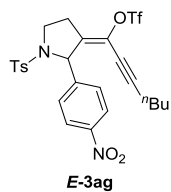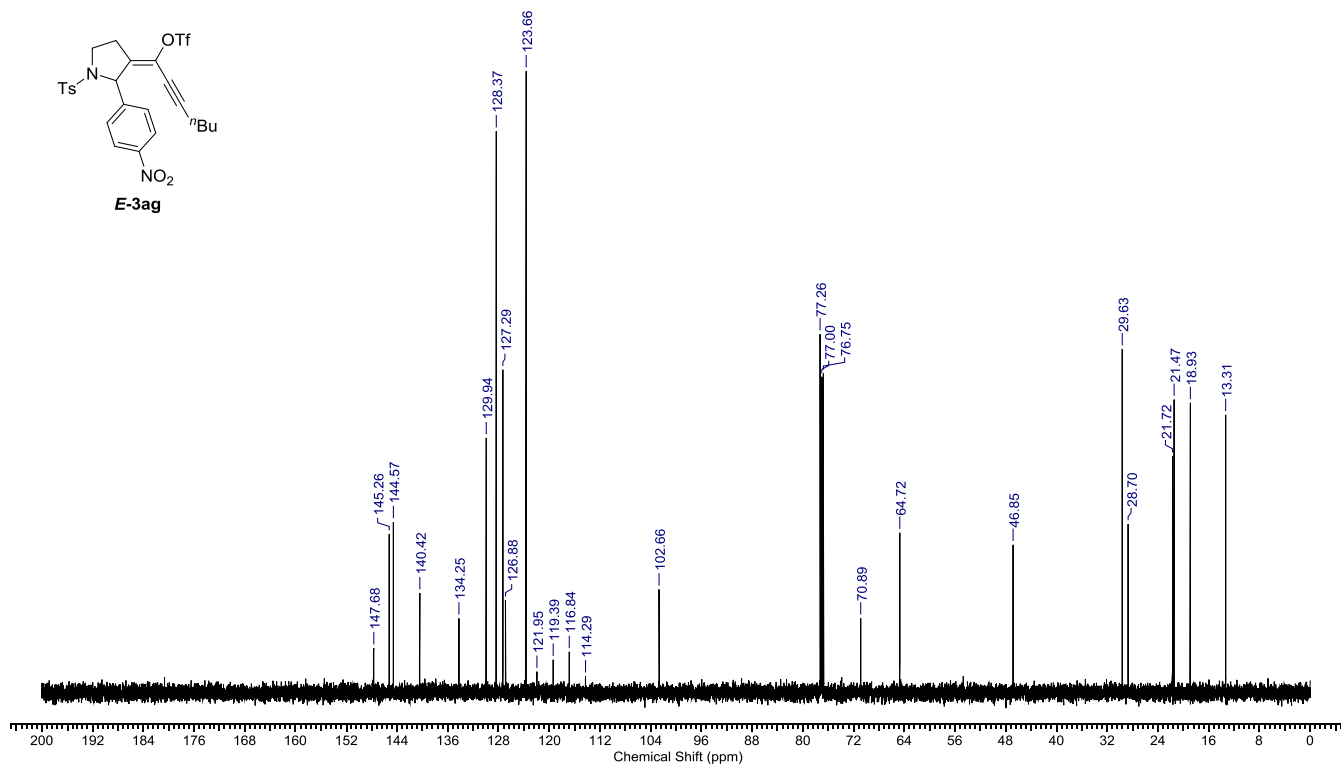

### <sup>1</sup>H NMR of **Z-3ag**

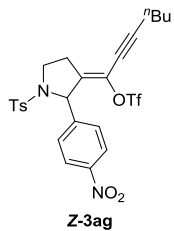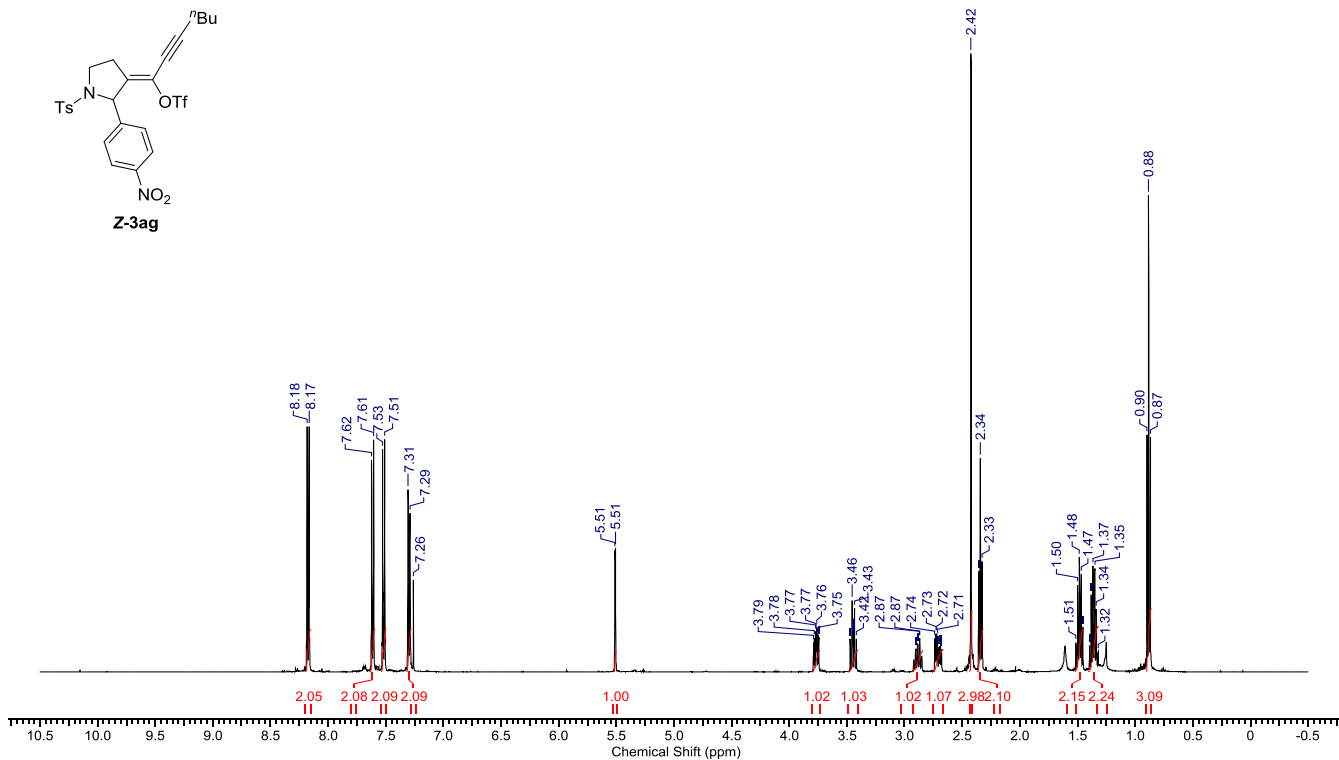

### <sup>13</sup>C NMR of **Z-3ag**

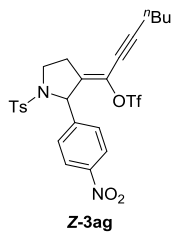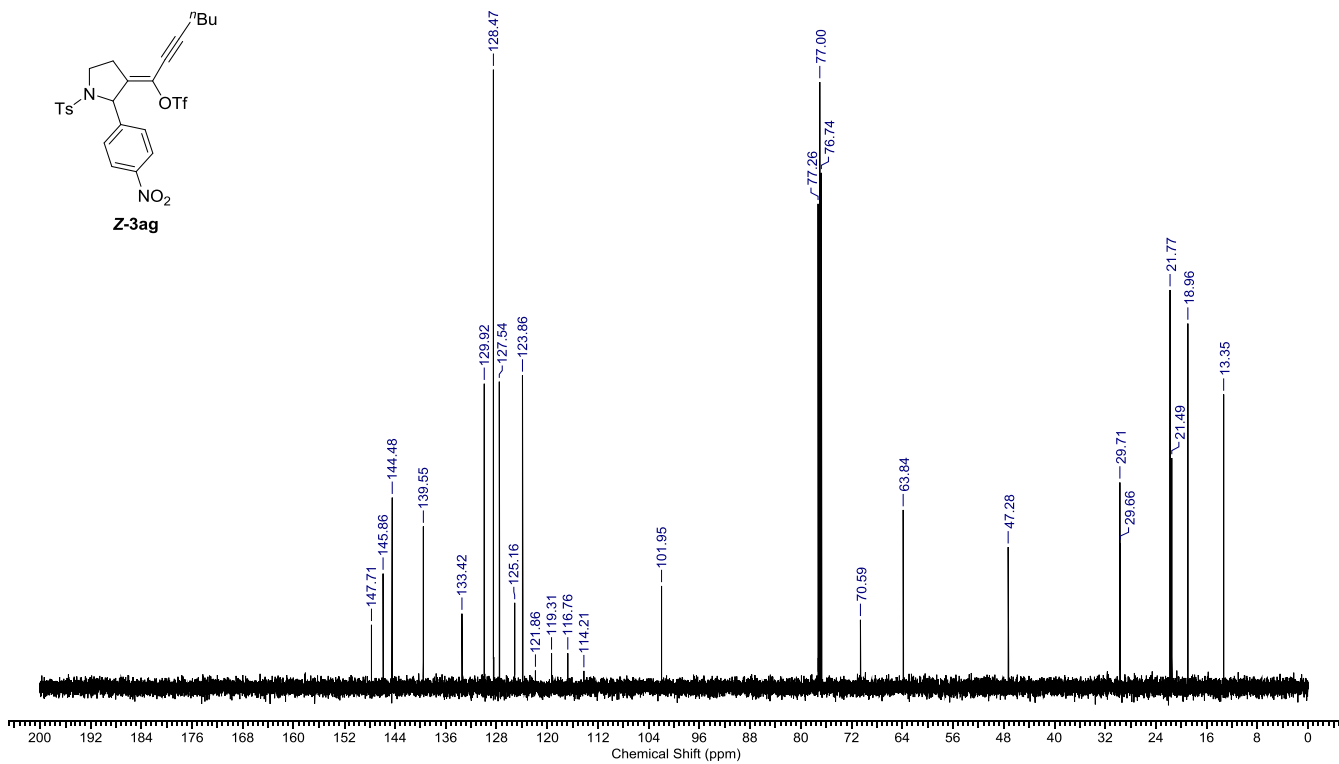

### $^1\text{H}$ NMR of *E*-3ah

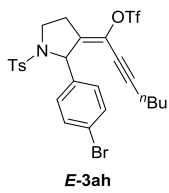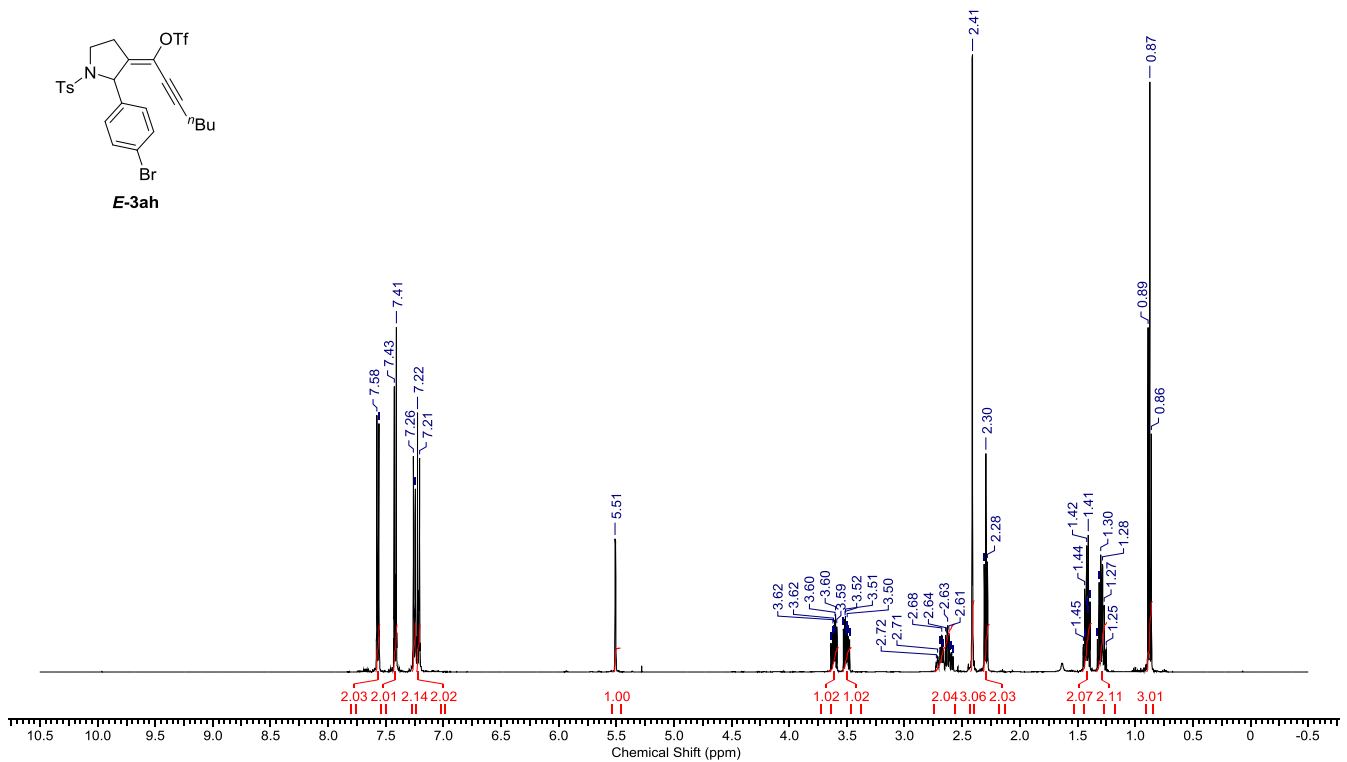

### $^{13}\text{C}$ NMR of *E*-3ah

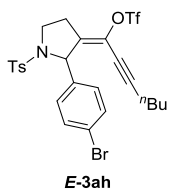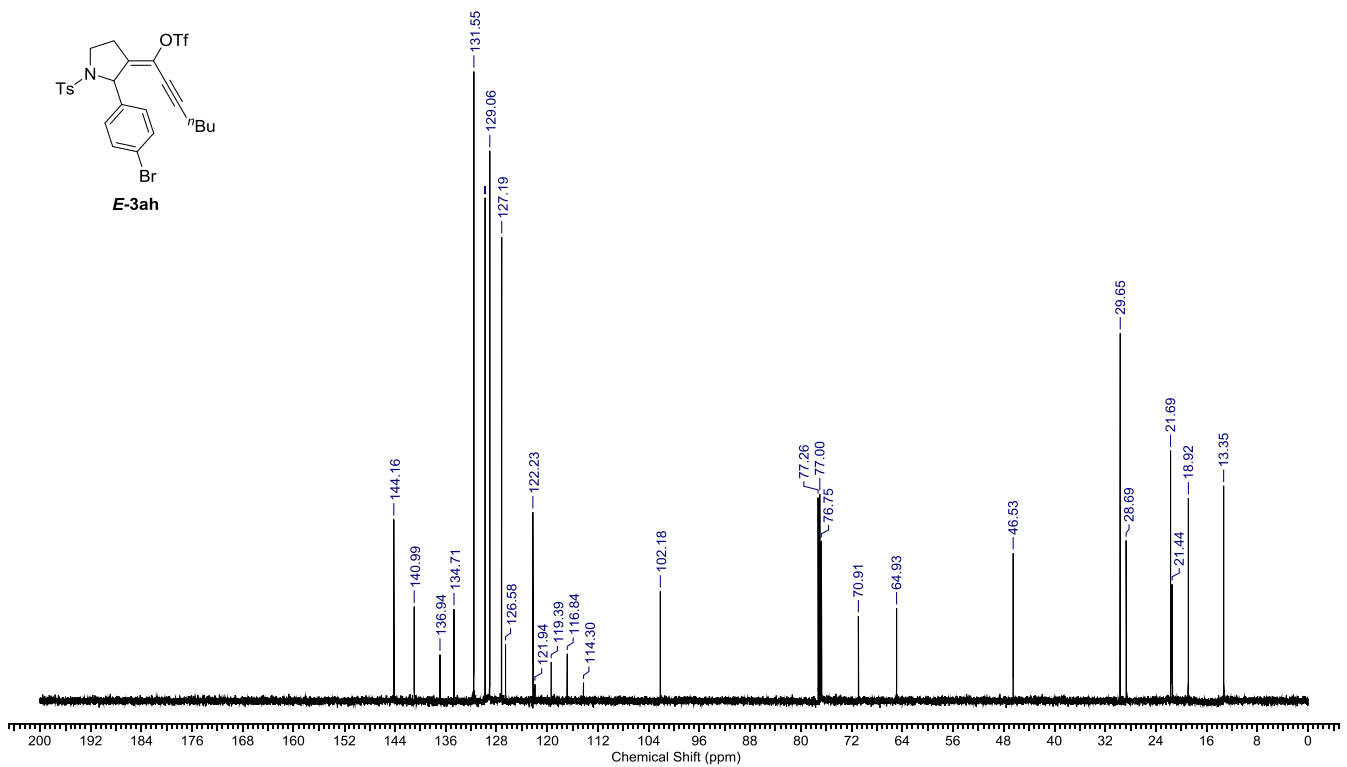

### <sup>1</sup>H NMR of Z-3ah

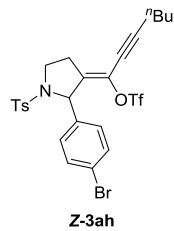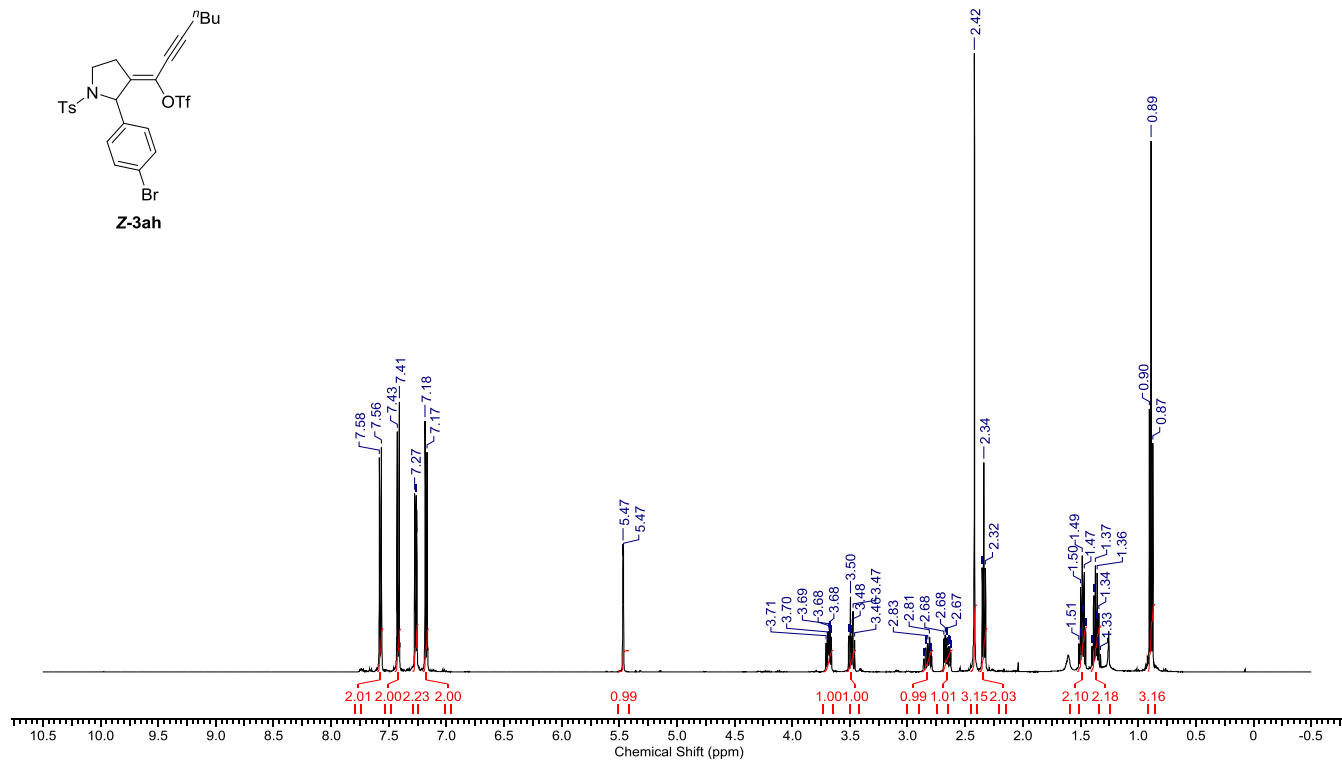

### <sup>13</sup>C NMR of Z-3ah

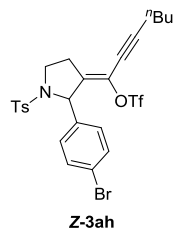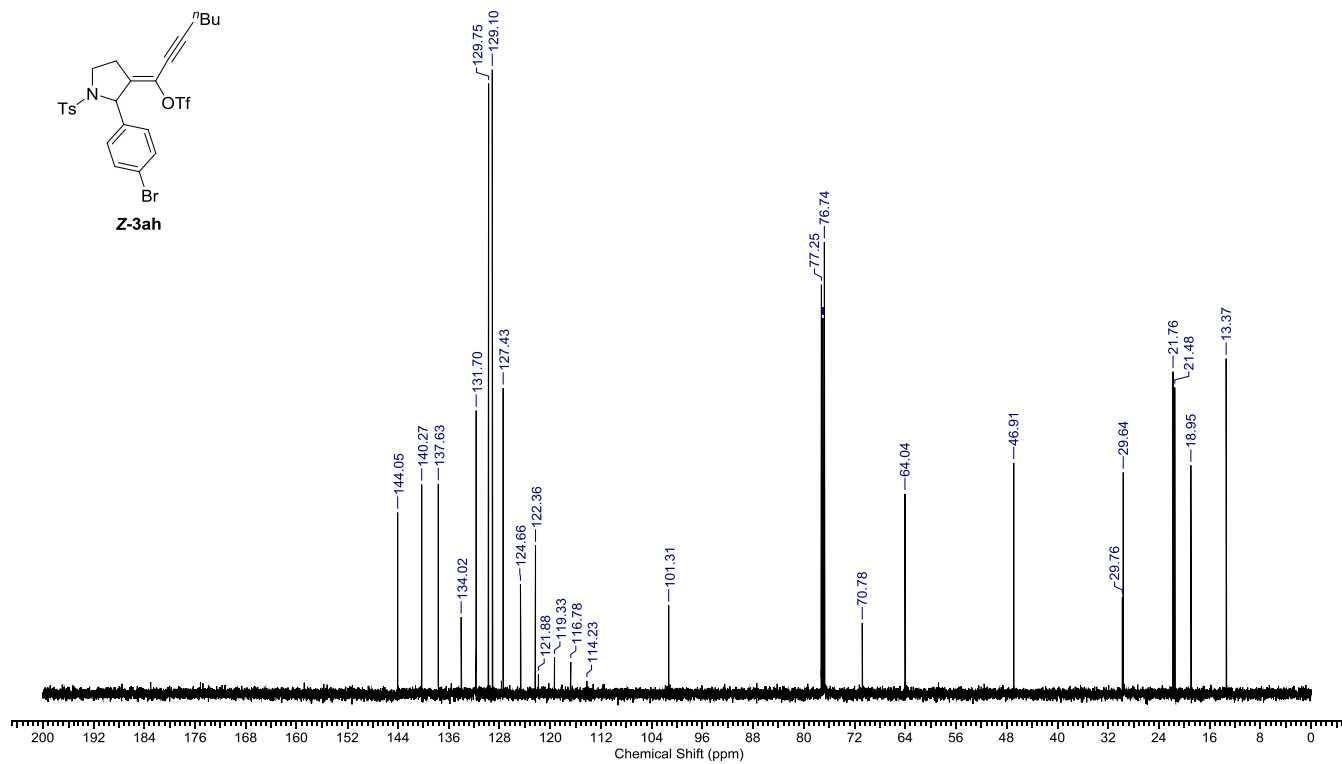

### $^1\text{H}$ NMR of *E*-3ai

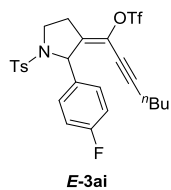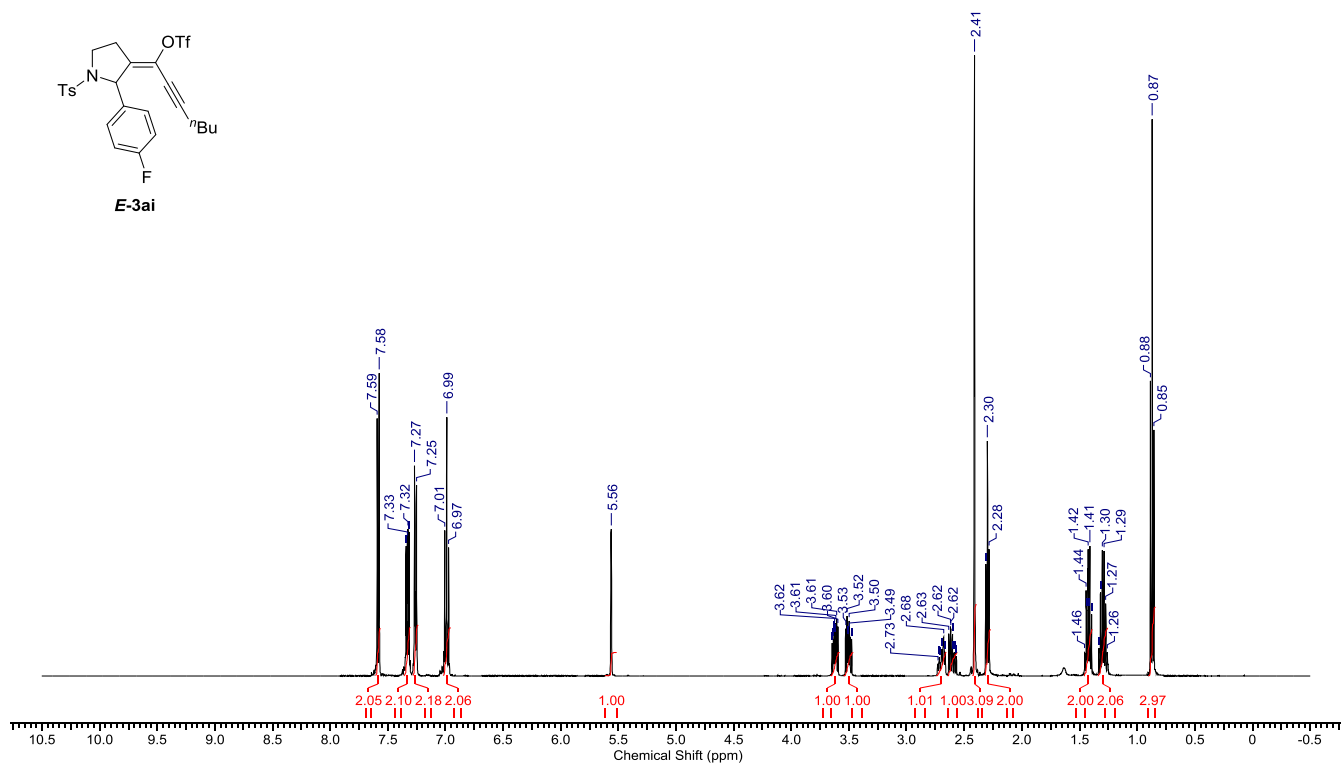

### $^{13}\text{C}$ NMR of *E*-3ai

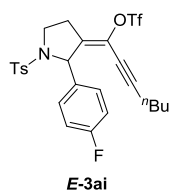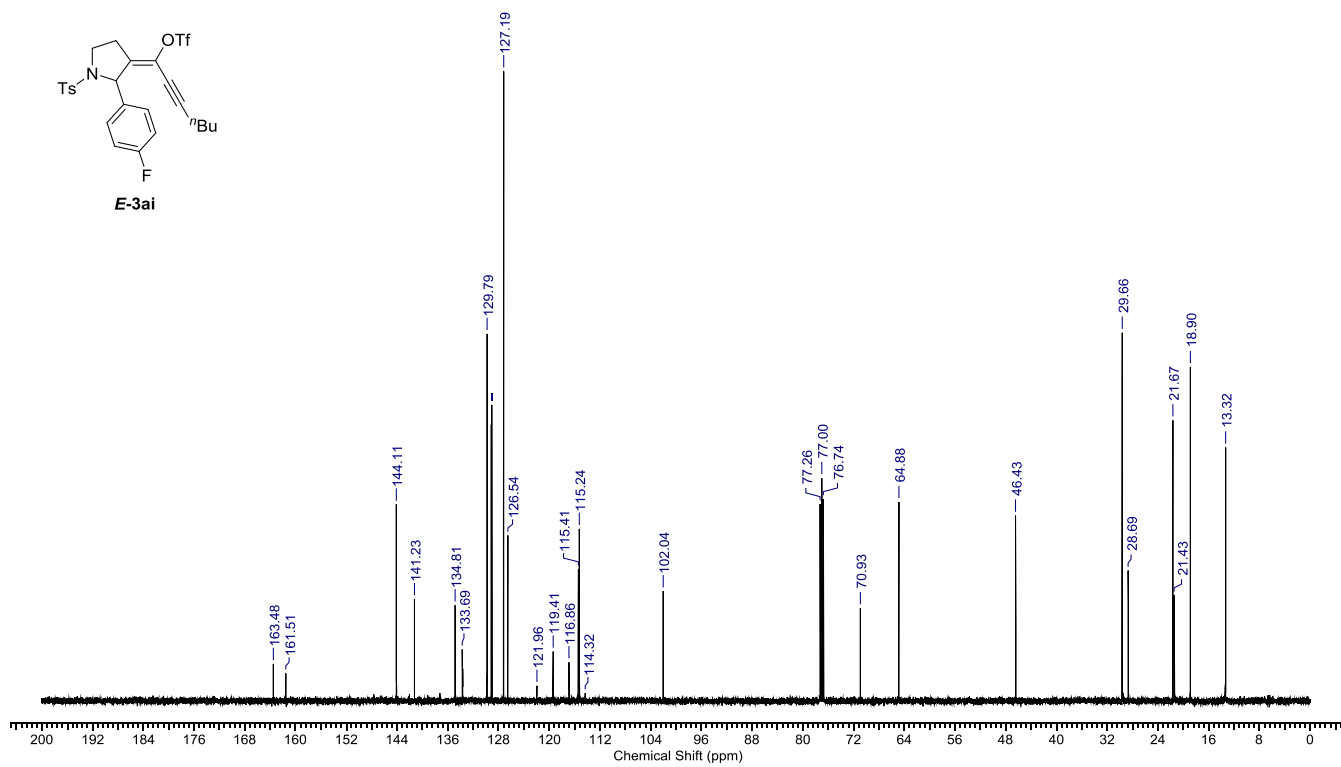

### <sup>1</sup>H NMR of Z-3ai

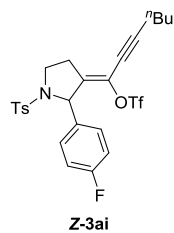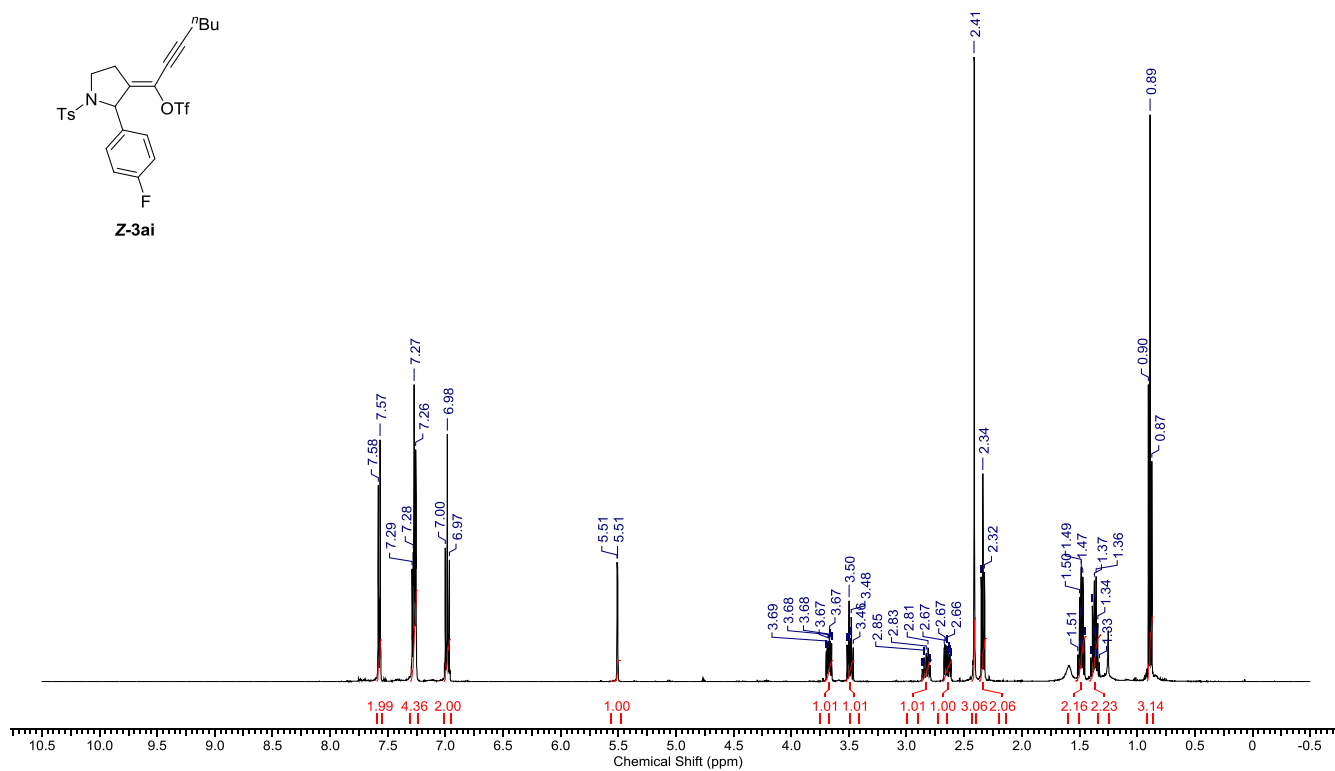

### <sup>13</sup>C NMR of Z-3ai

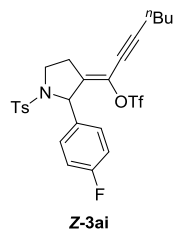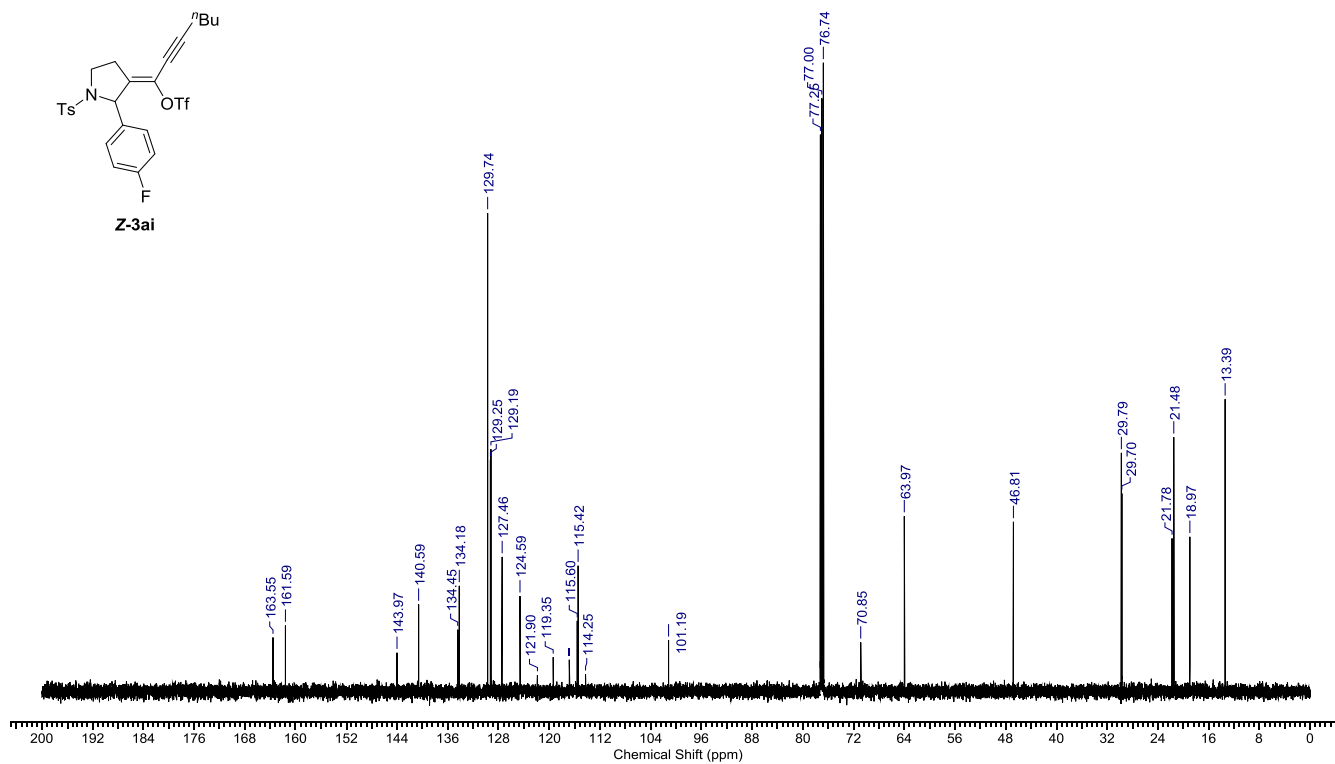



### <sup>1</sup>H NMR of *E*-3aj

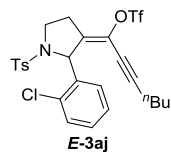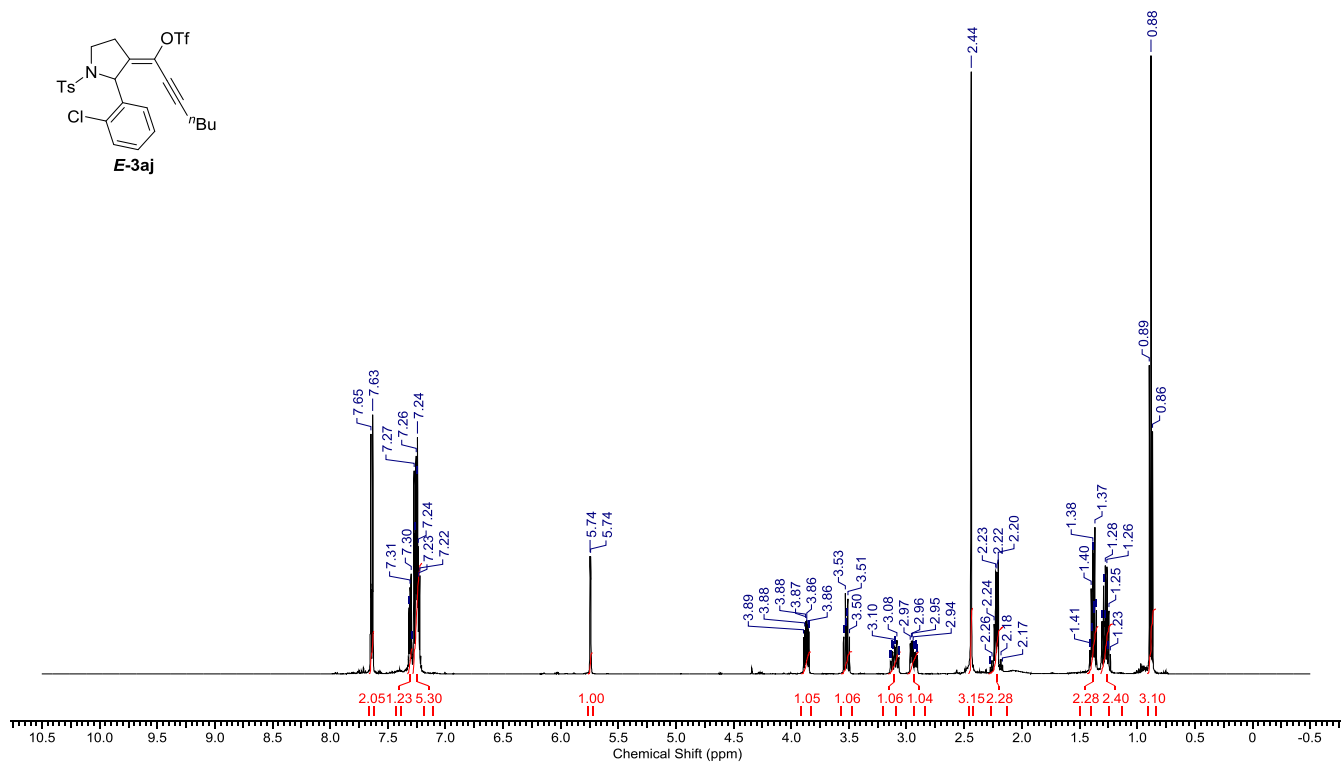

### <sup>13</sup>C NMR of *E*-3aj

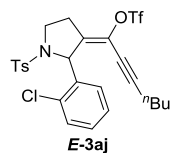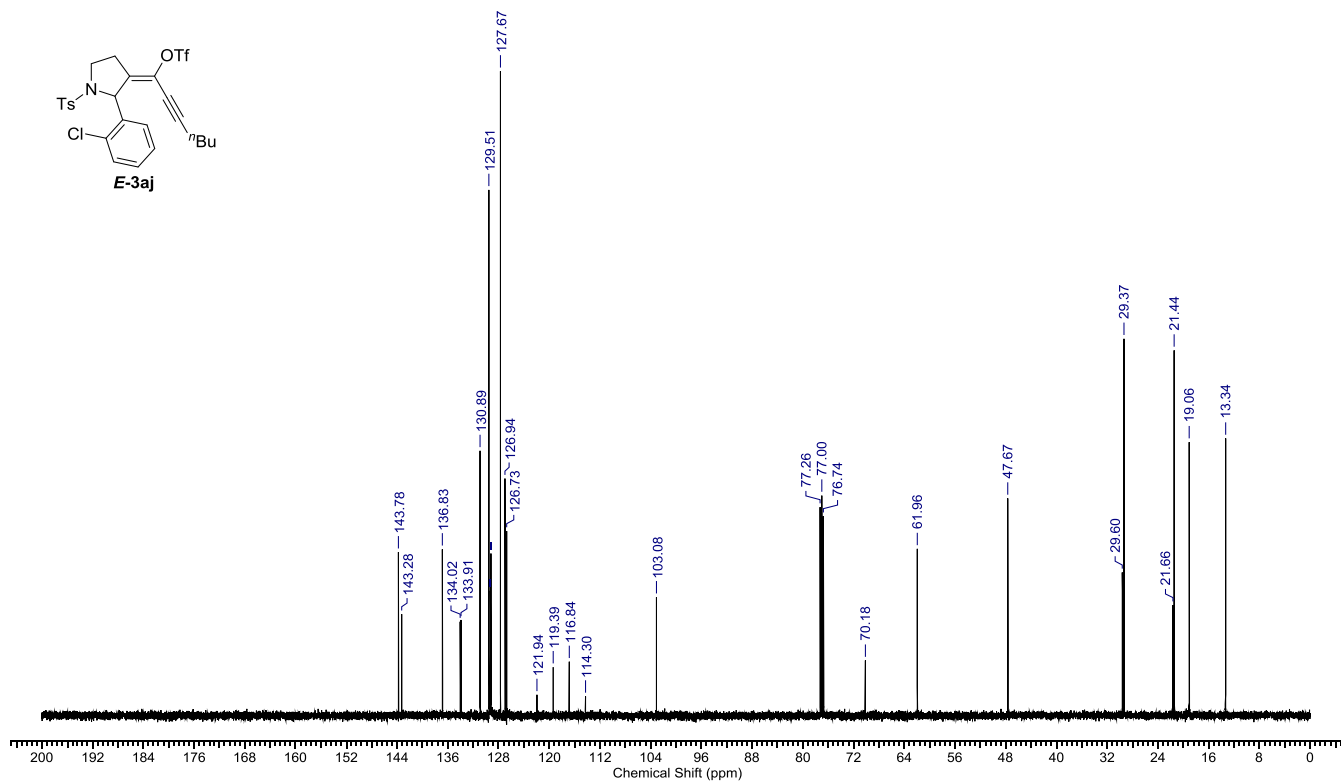

### $^1\text{H}$ NMR of *E*-3ak

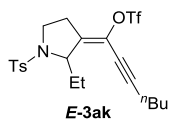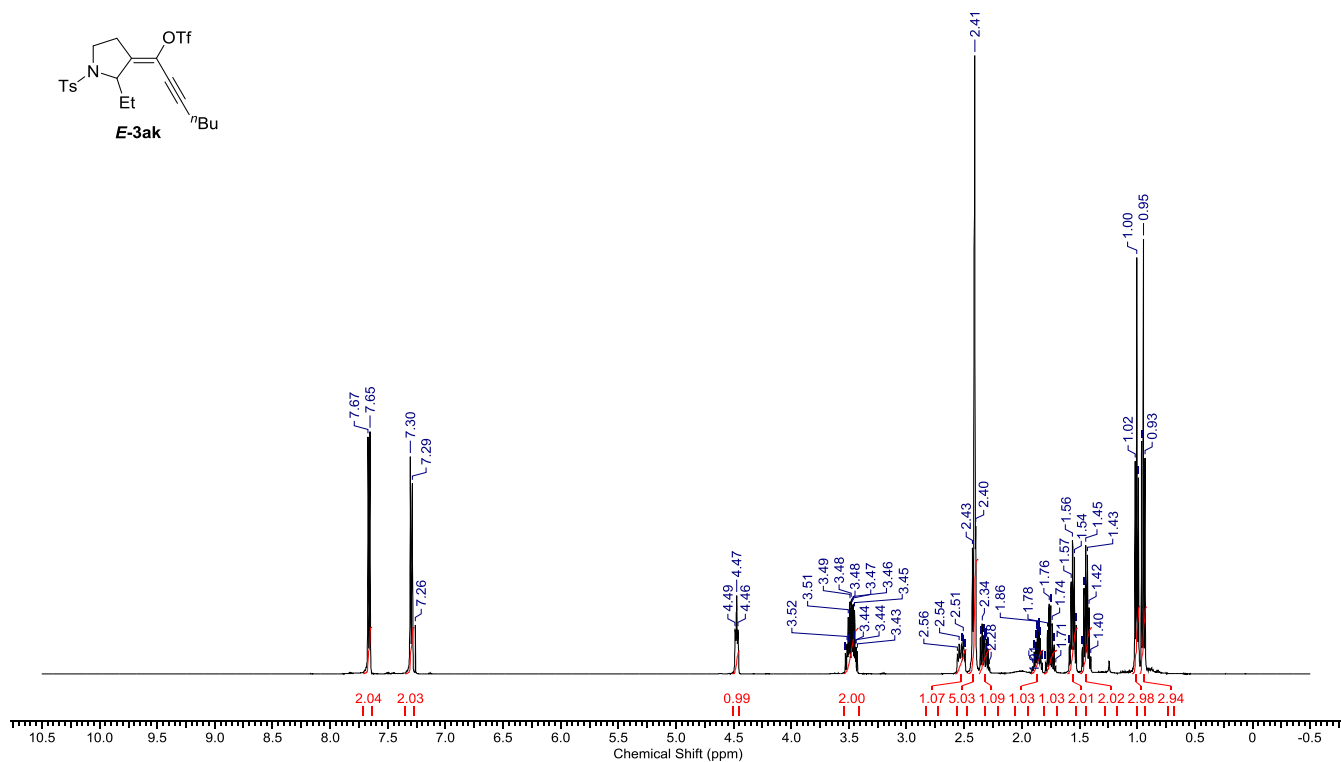

### $^{13}\text{C}$ NMR of *E*-3ak

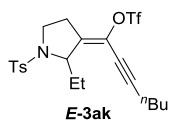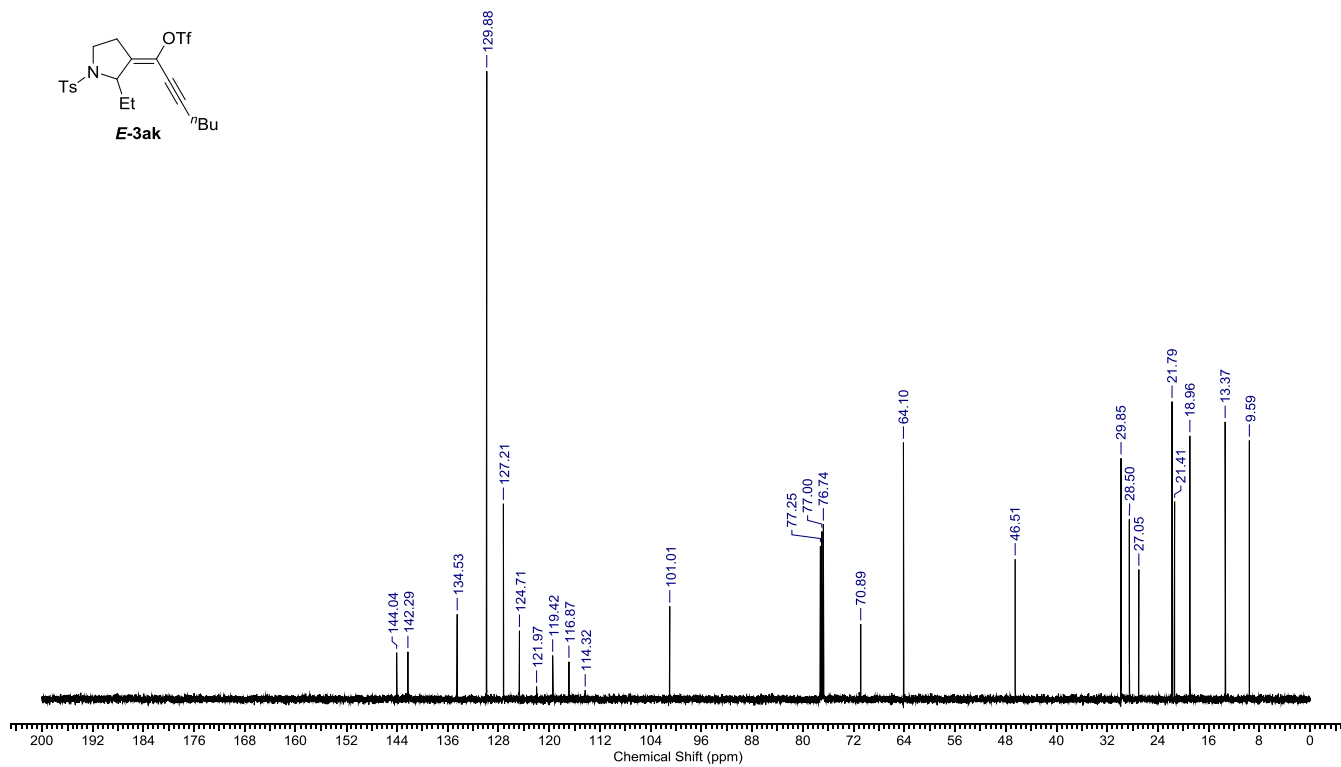

### <sup>1</sup>H NMR of Z-3ak

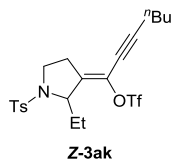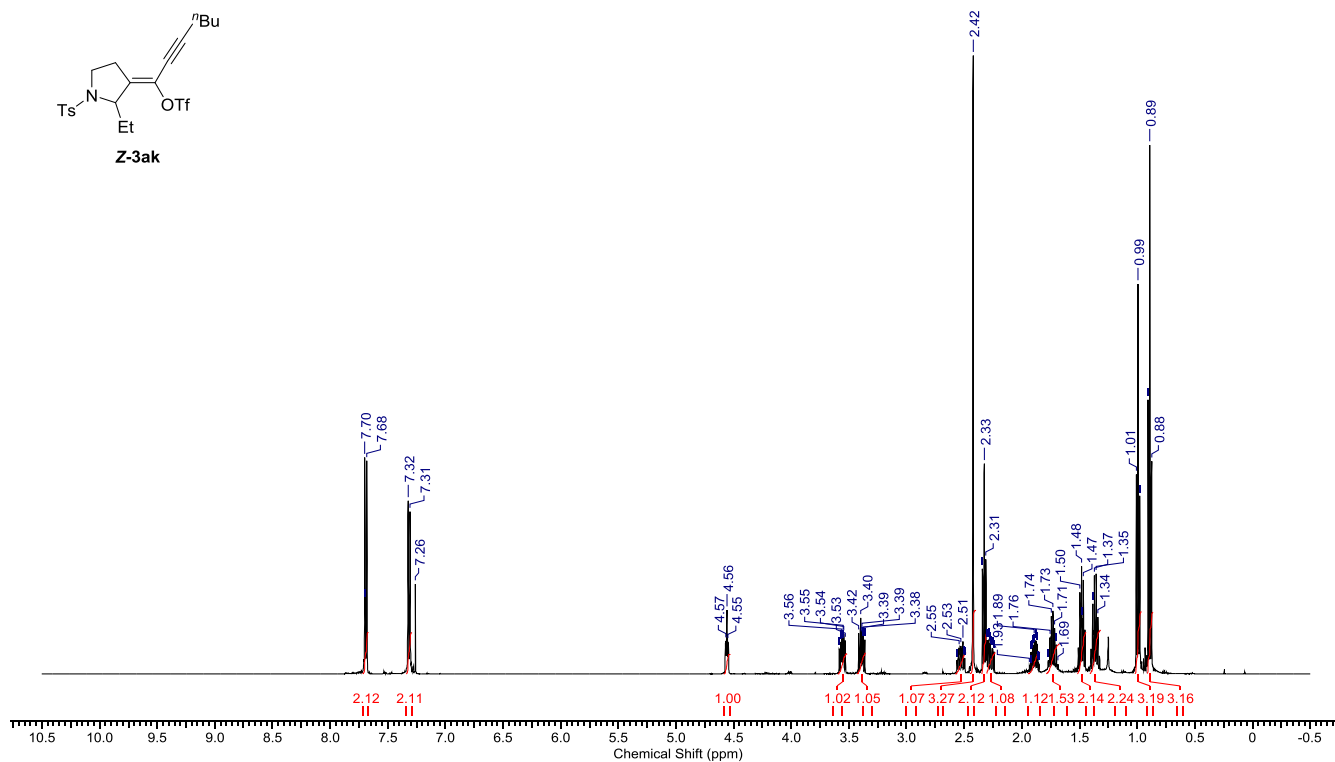

### <sup>13</sup>C NMR of Z-3ak

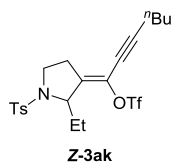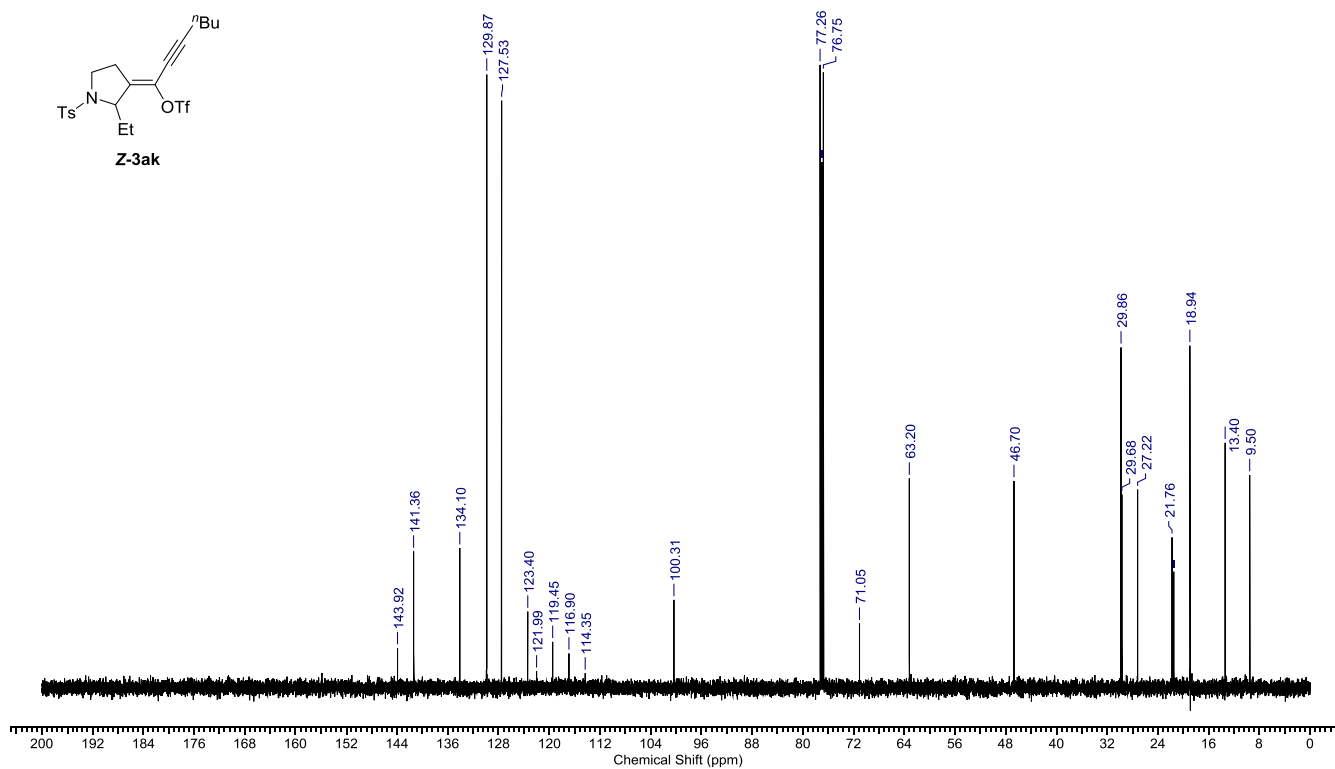

### $^1\text{H}$ NMR of *E*-3al

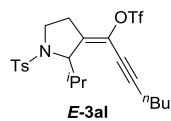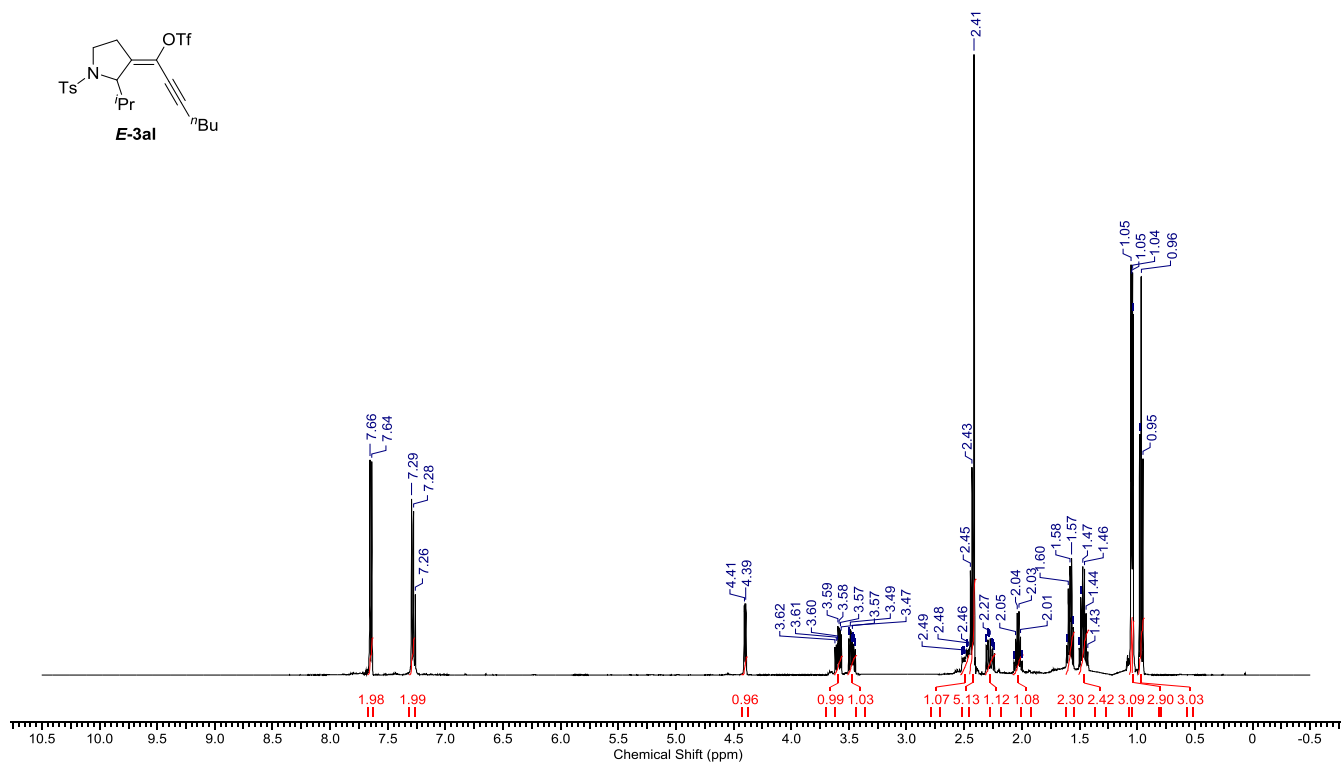

### $^{13}\text{C}$ NMR of *E*-3al

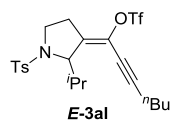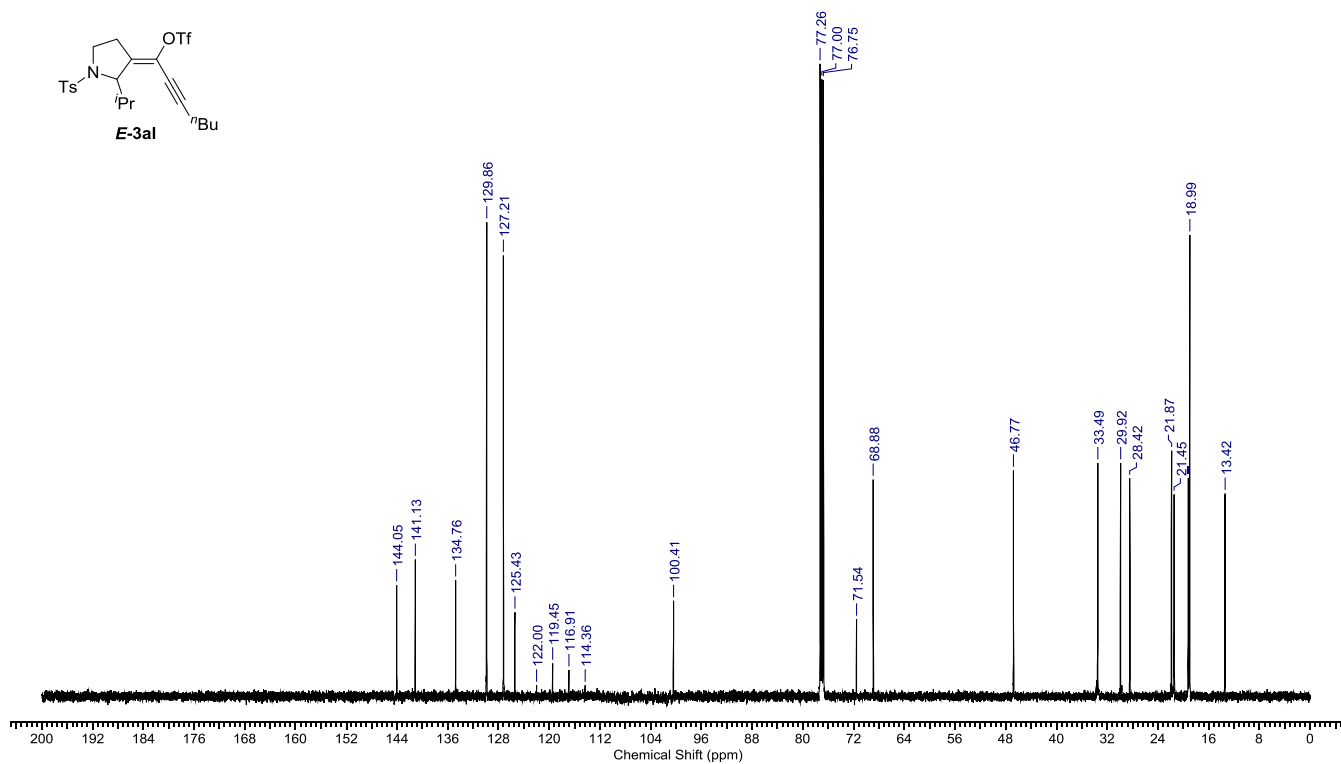

### $^1\text{H}$ NMR of *E*-3am

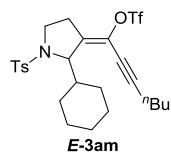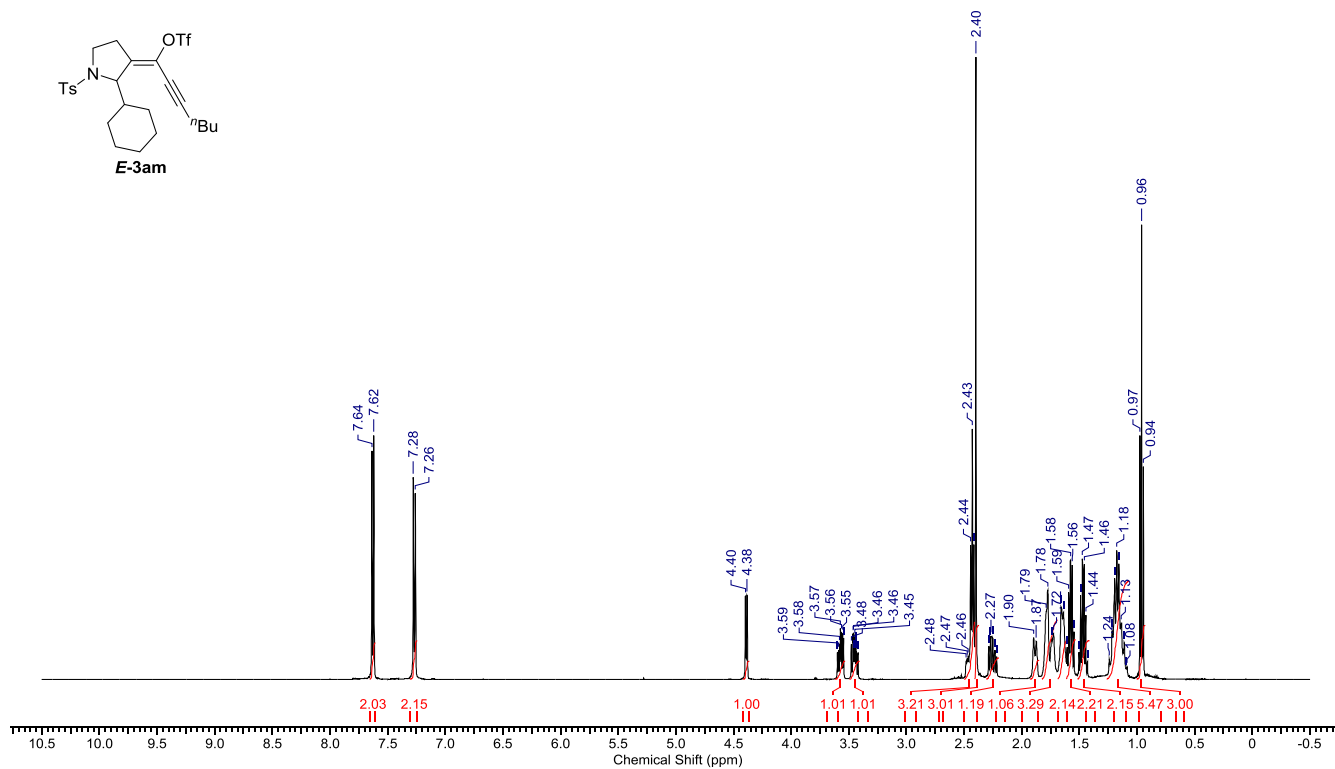

### $^{13}\text{C}$ NMR of *E*-3am

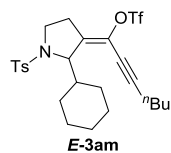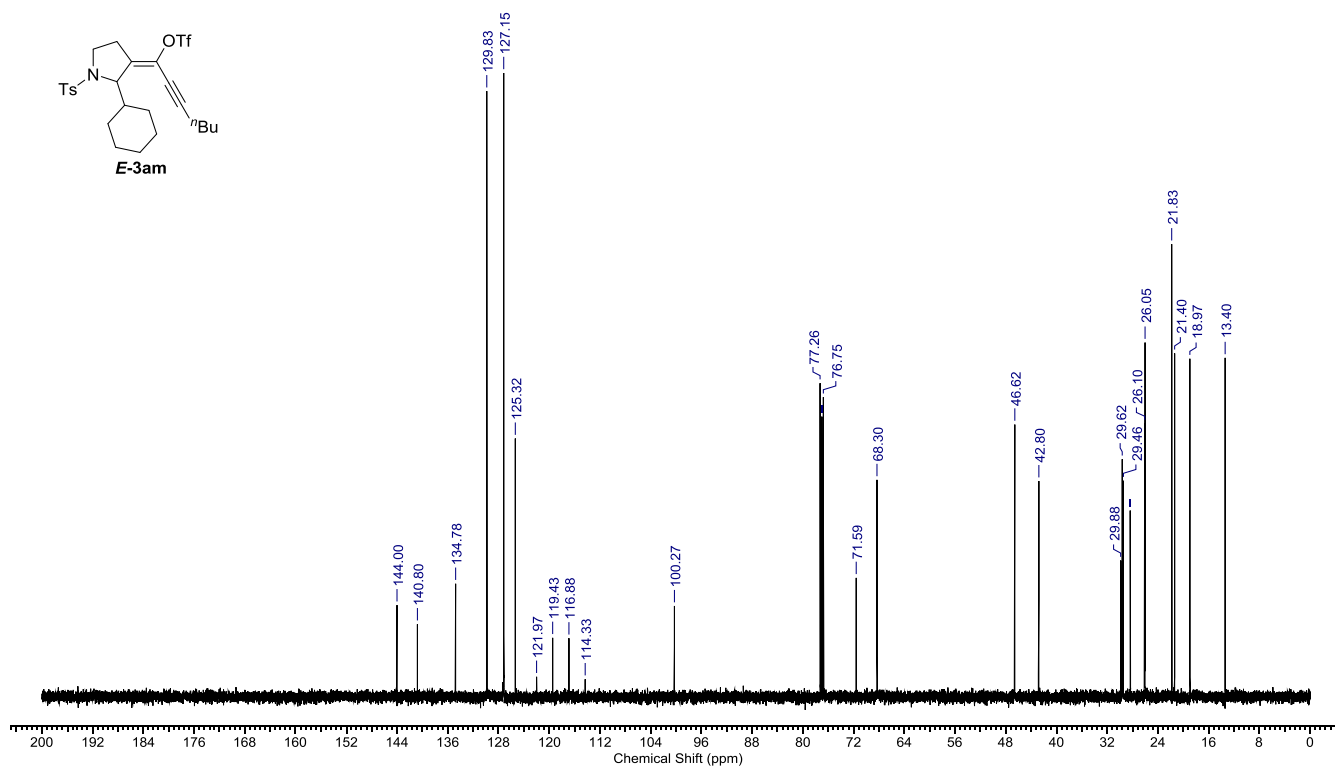

### <sup>1</sup>H NMR of *E*-3an

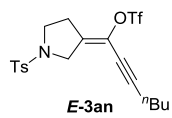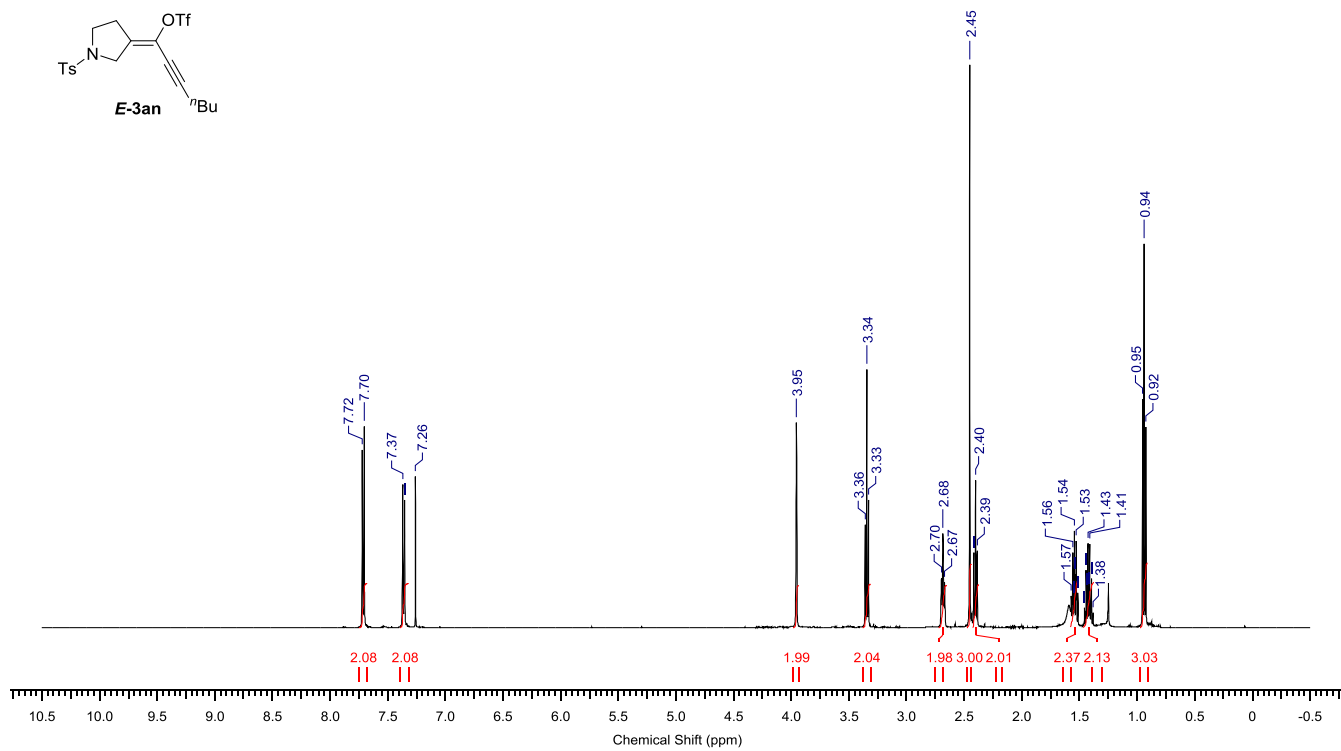

### <sup>13</sup>C NMR of *E*-3an

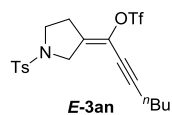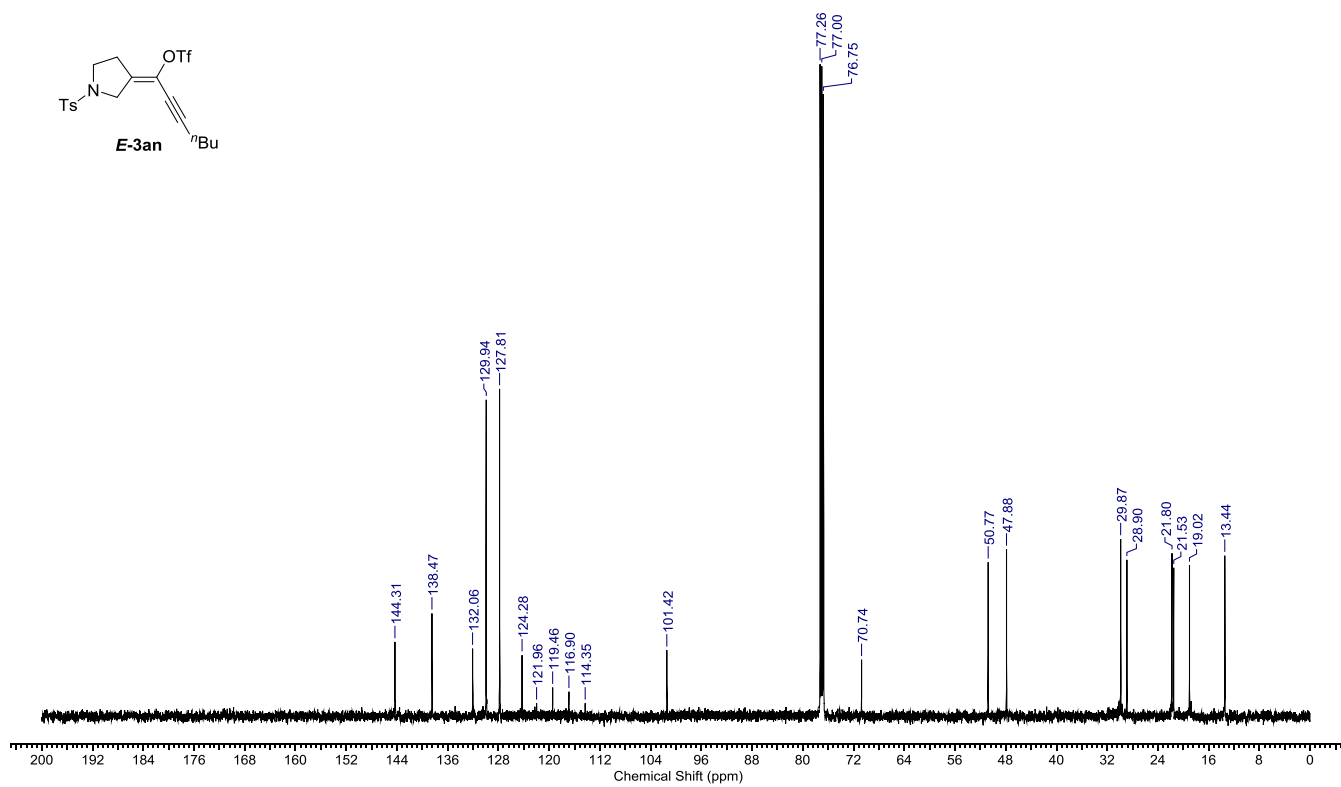

### <sup>1</sup>H NMR of **Z-3an**

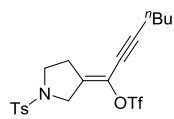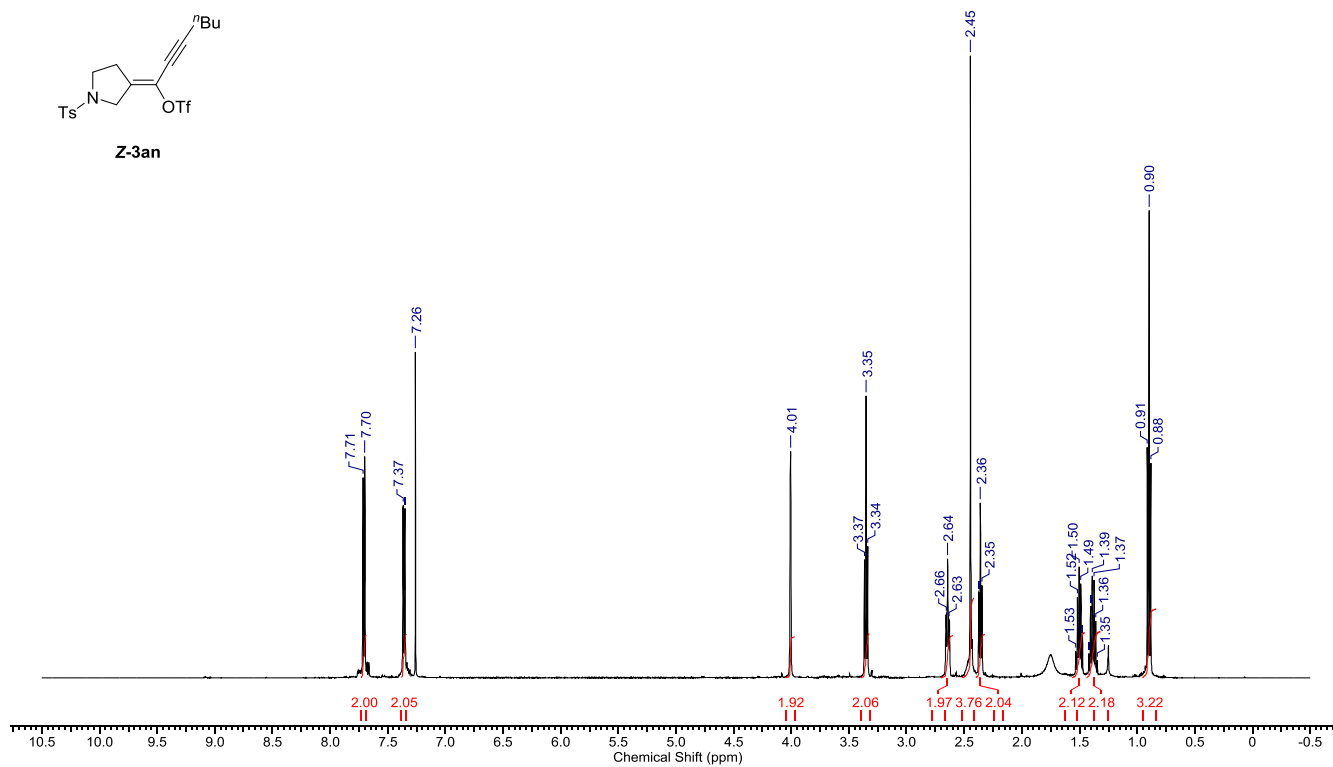

### <sup>13</sup>C NMR of **Z-3an**

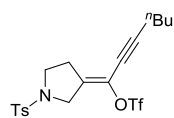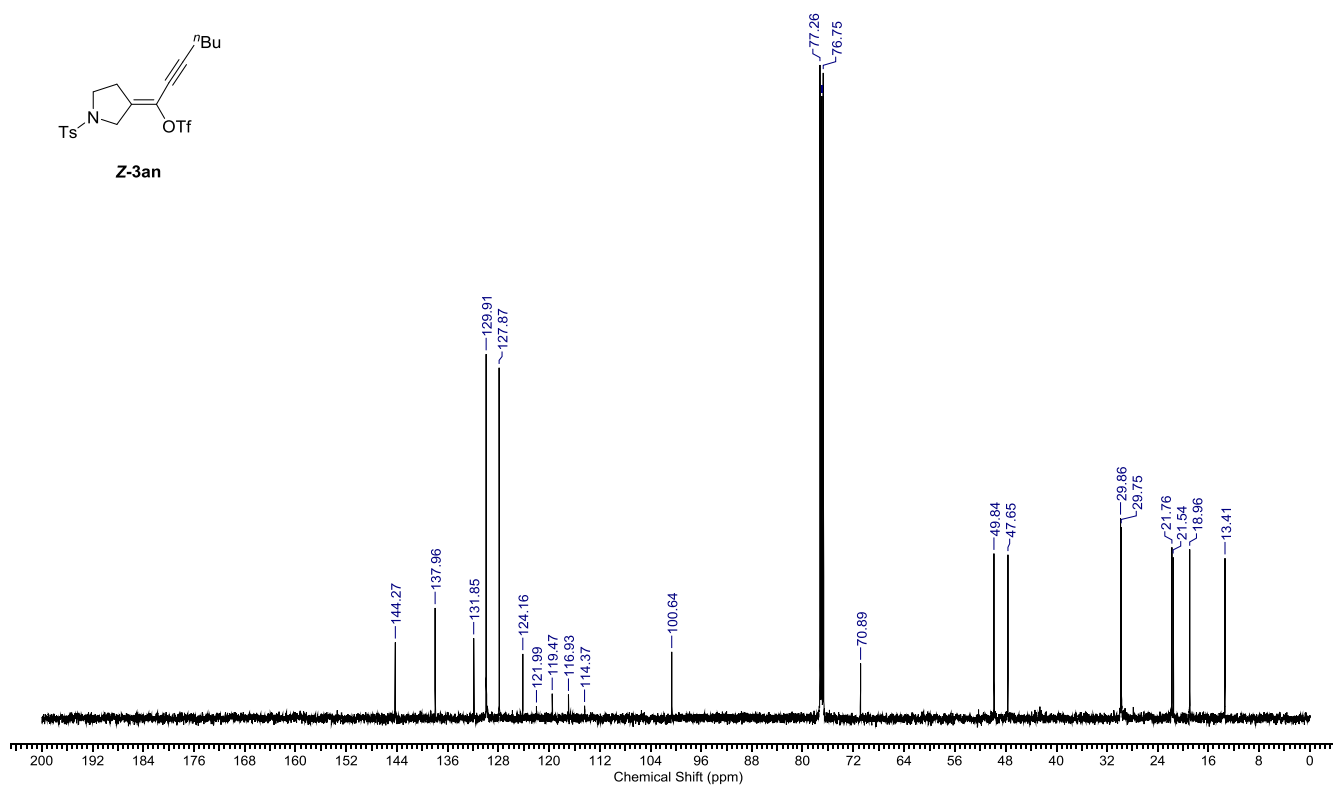

### $^1\text{H}$ NMR of *E*-3ba

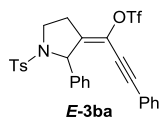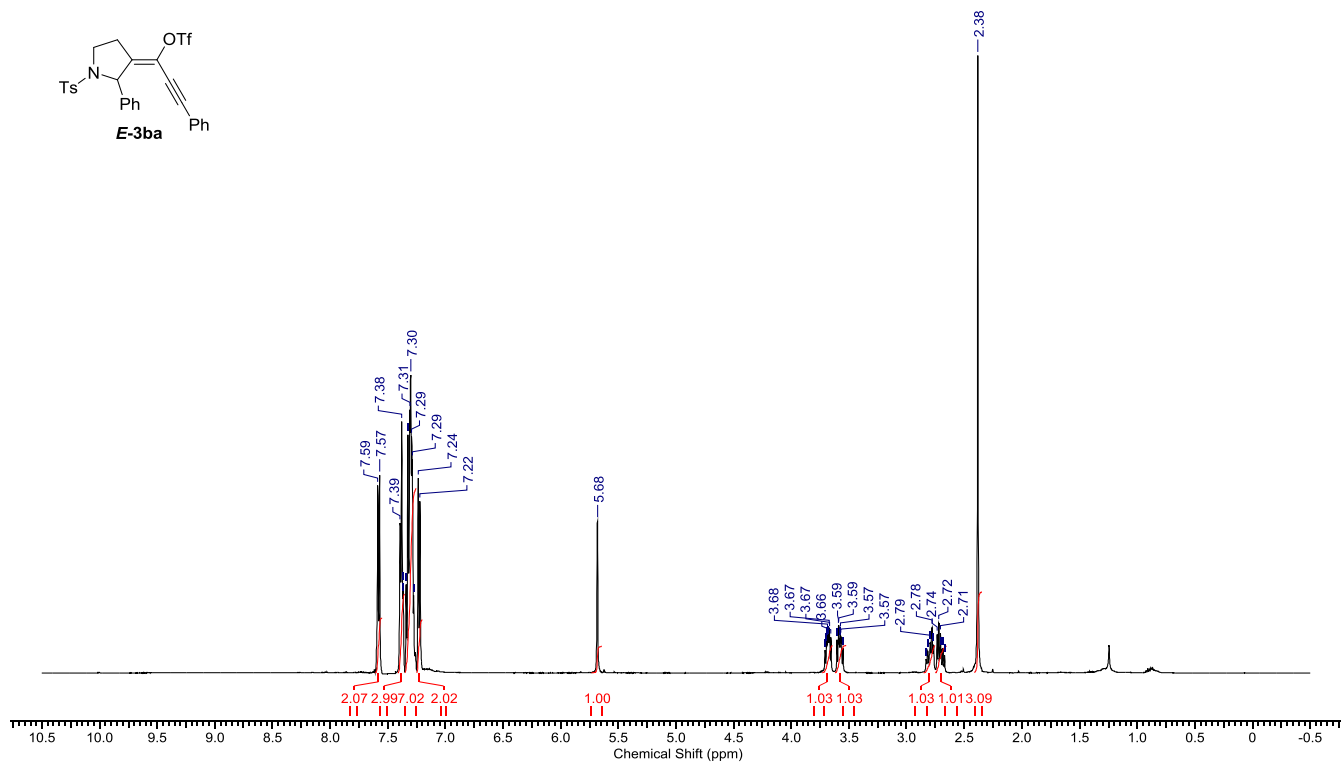

### $^{13}\text{C}$ NMR of *E*-3ba

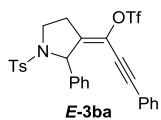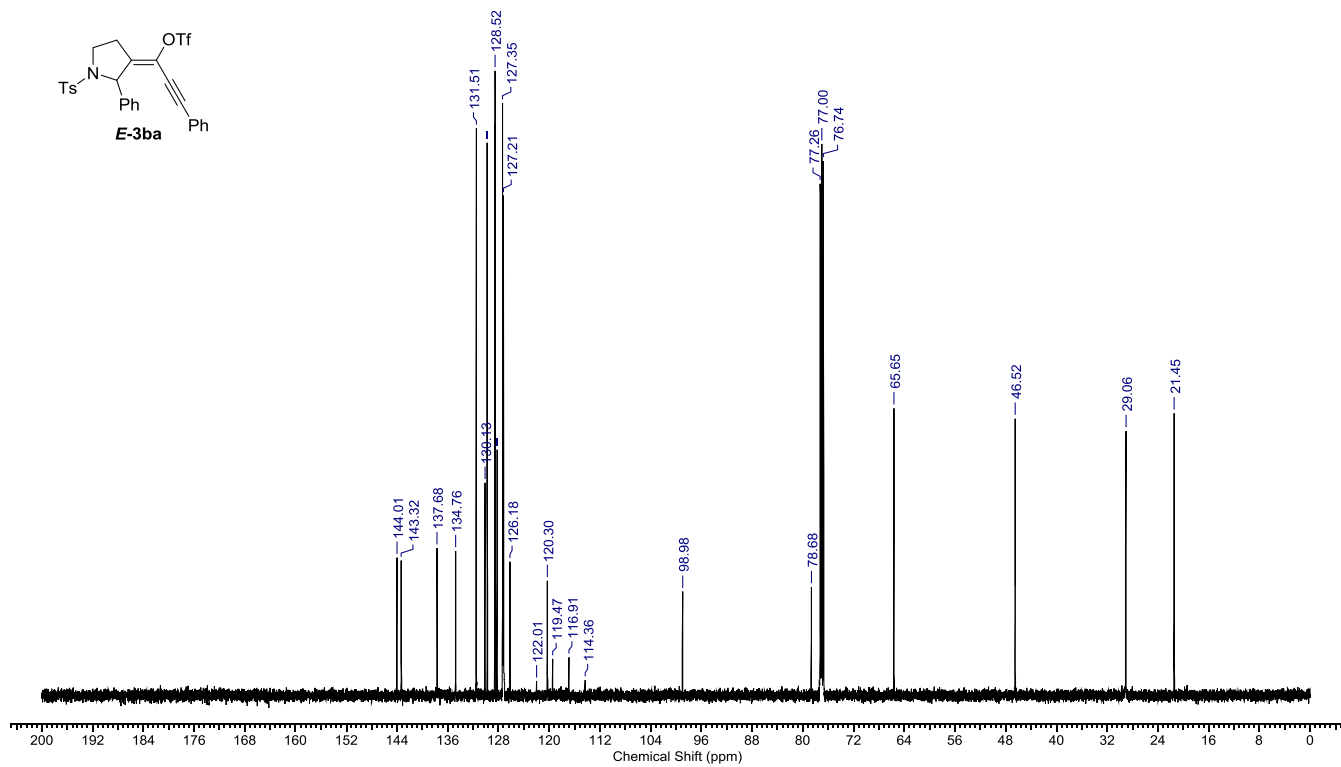



### $^1\text{H}$ NMR of **5ba**

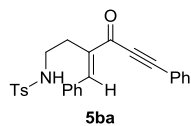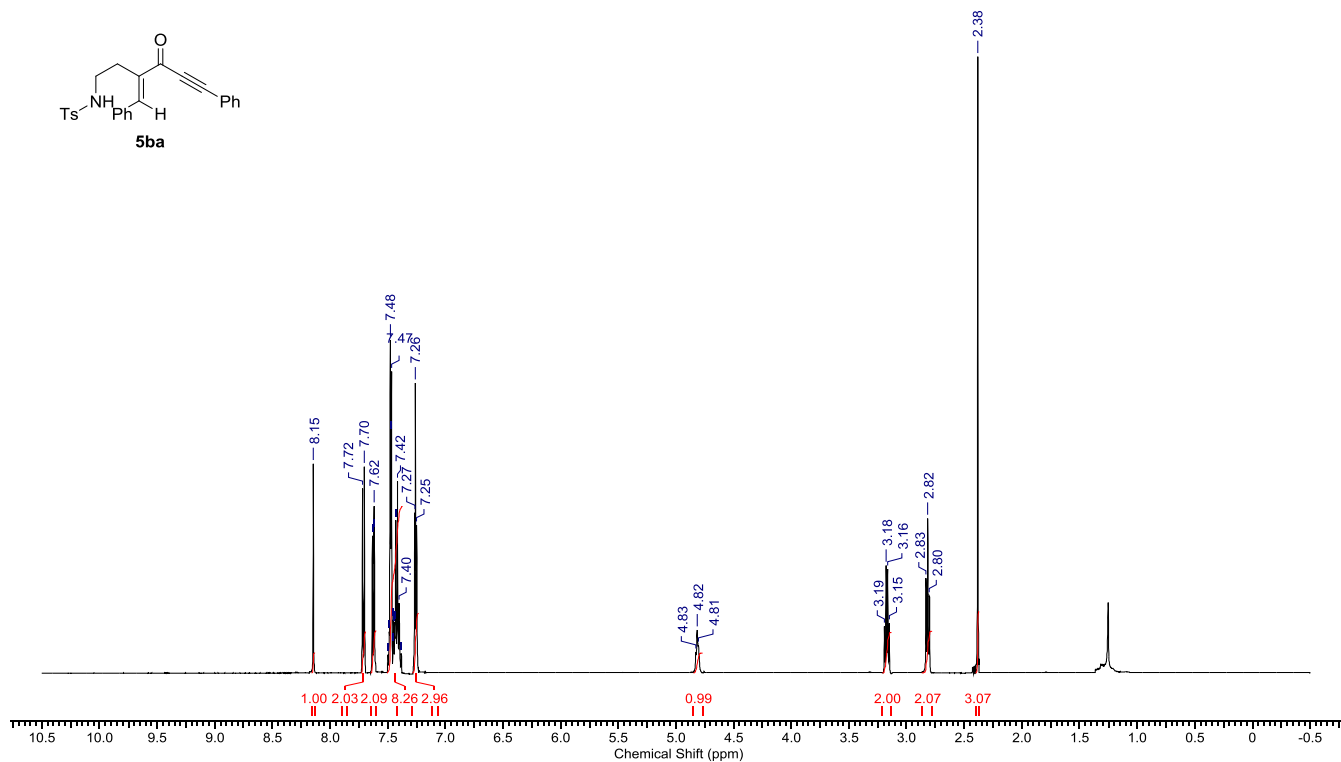

### $^{13}\text{C}$ NMR of **5ba**

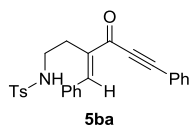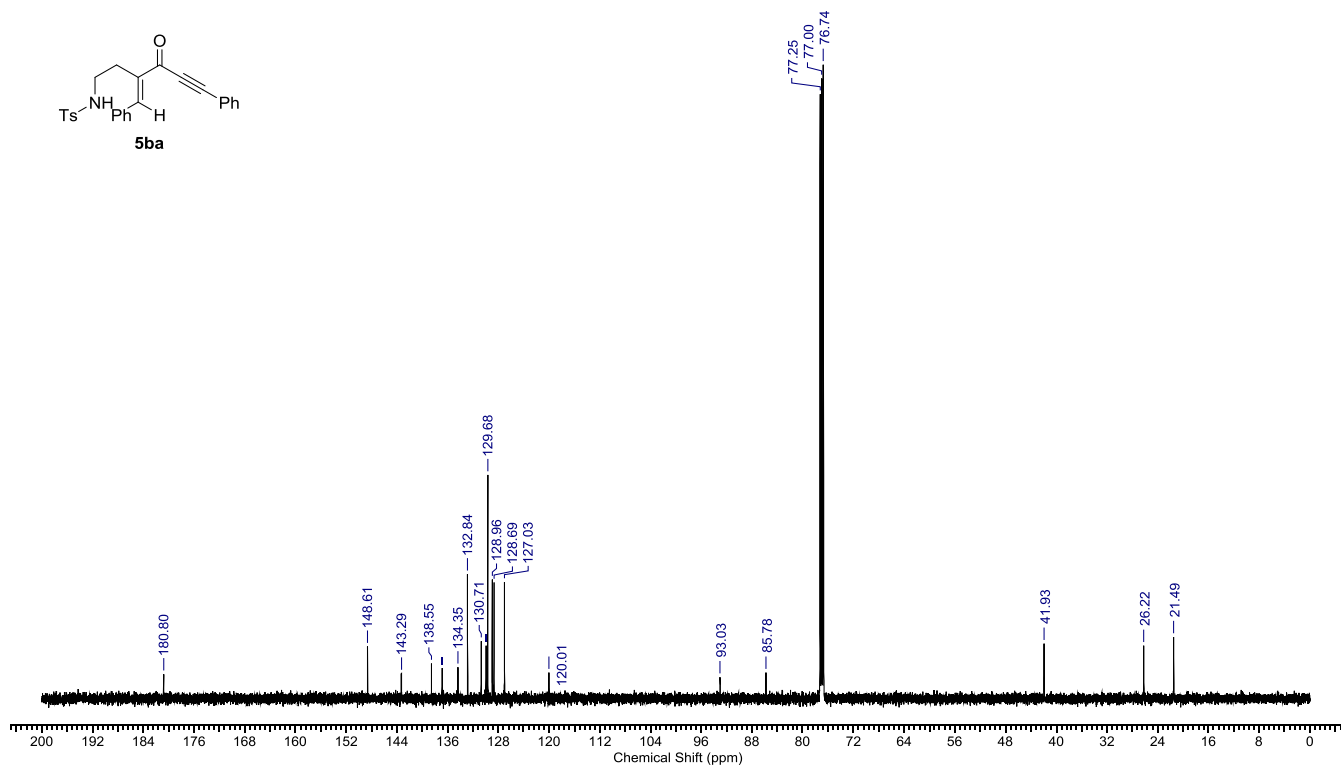

$^1\text{H}$  NMR of *E*-3ca

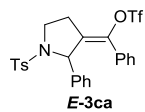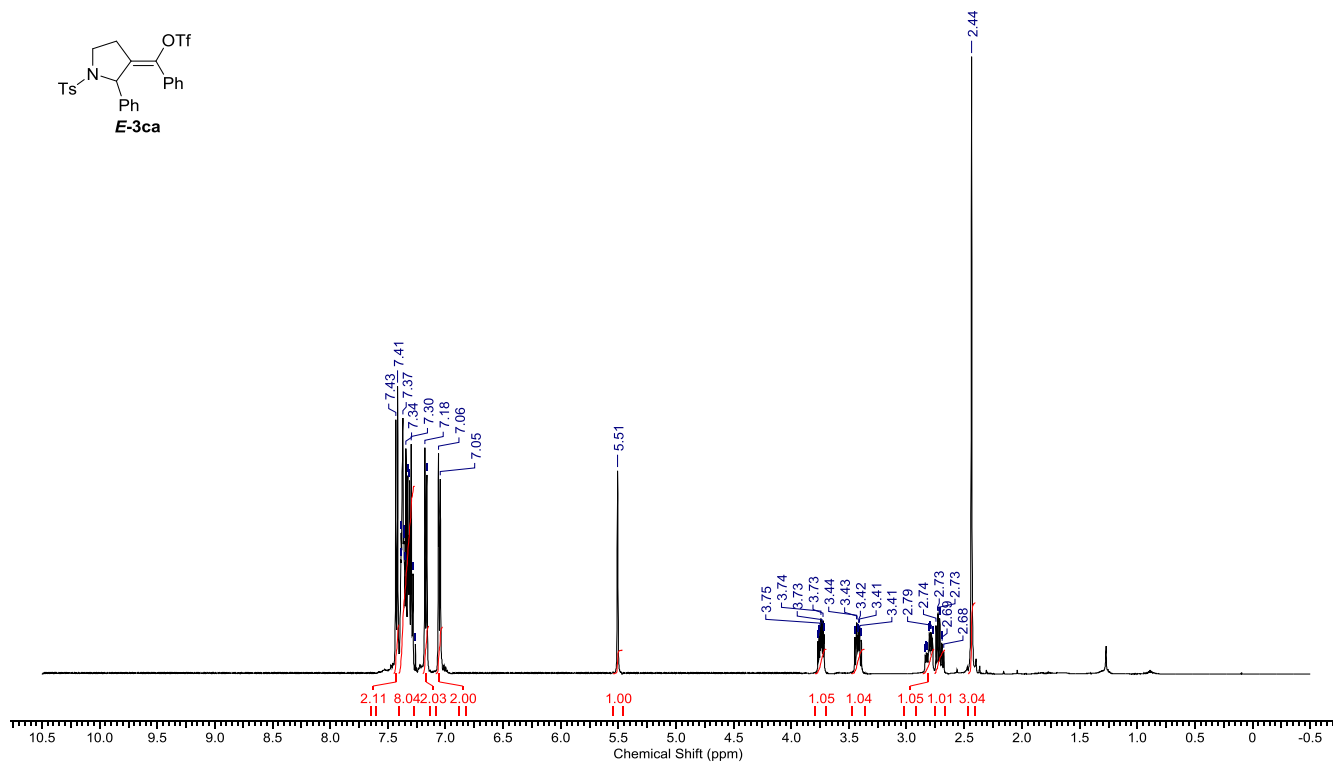

$^{13}\text{C}$  NMR of *E*-3ca

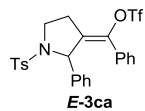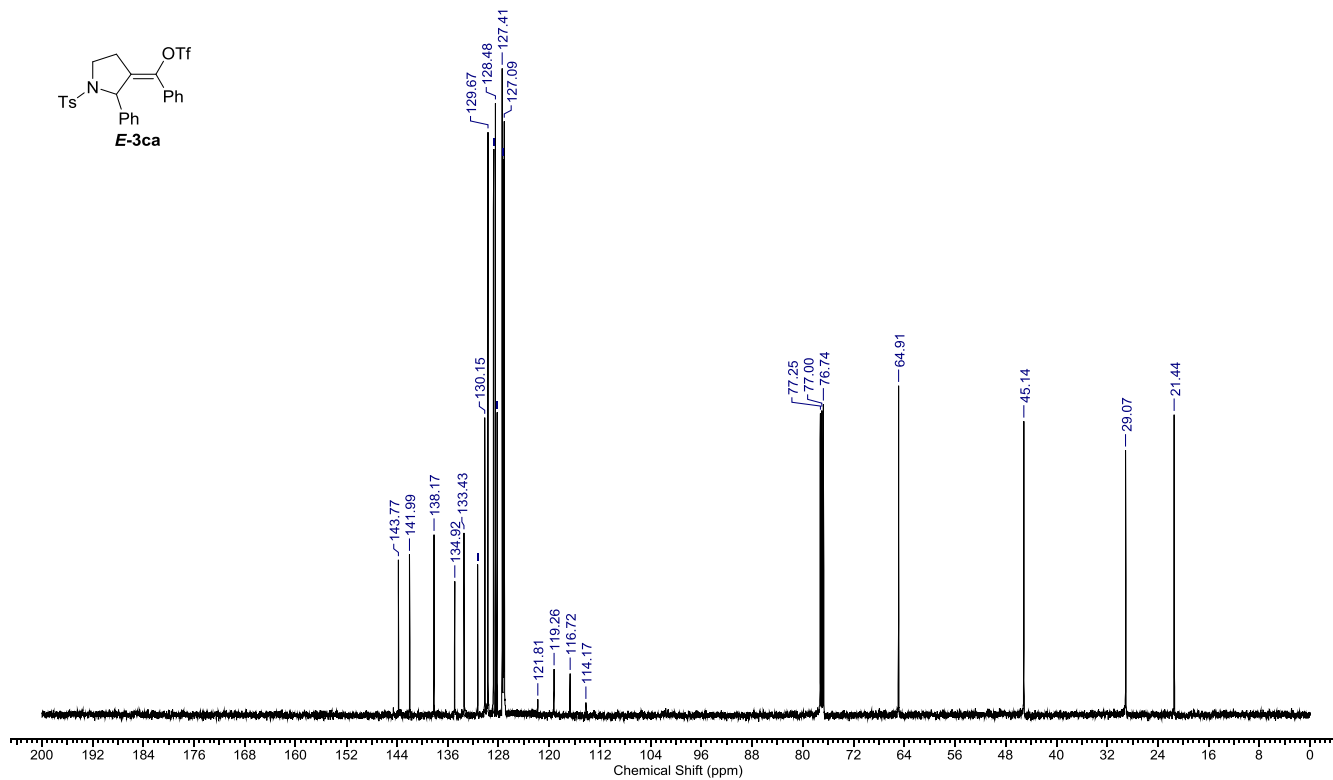

### <sup>1</sup>H NMR of 5ca

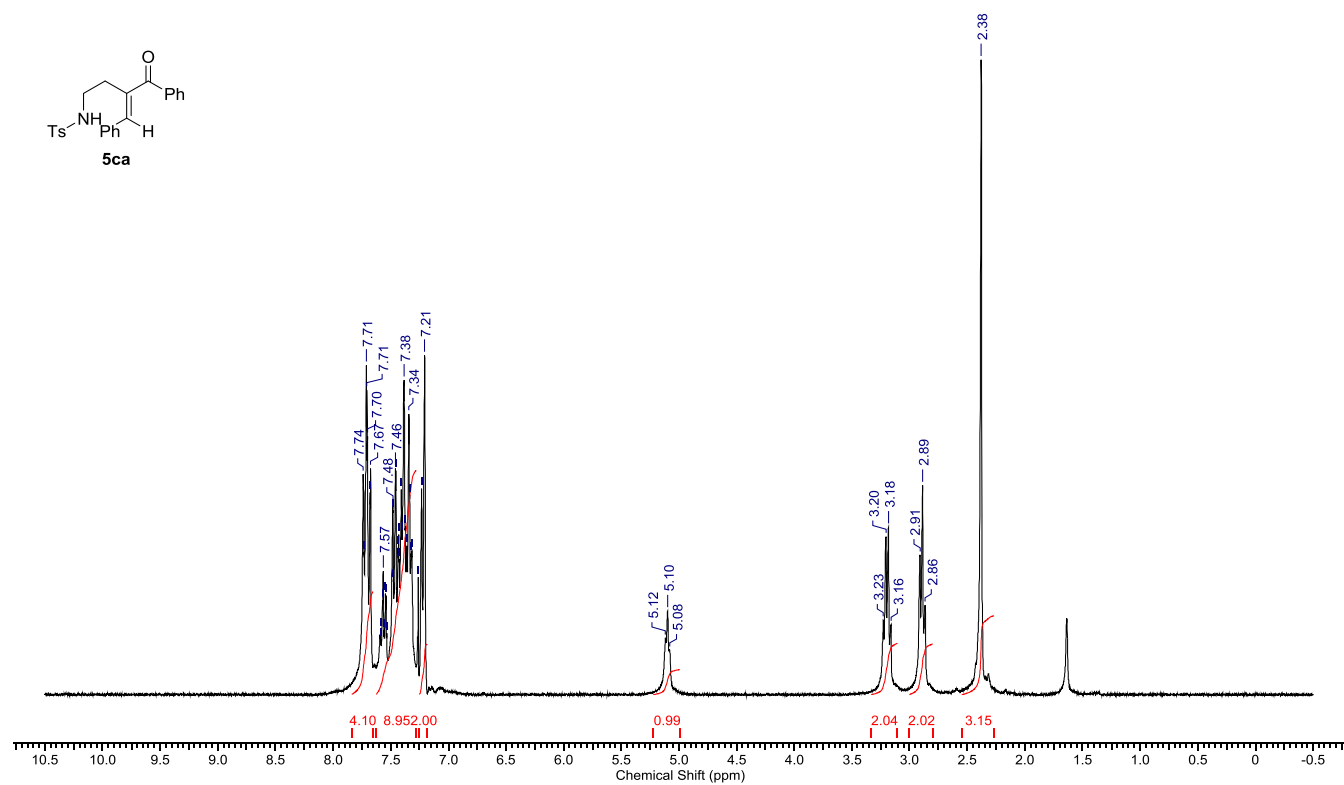

### <sup>13</sup>C NMR of 5ca

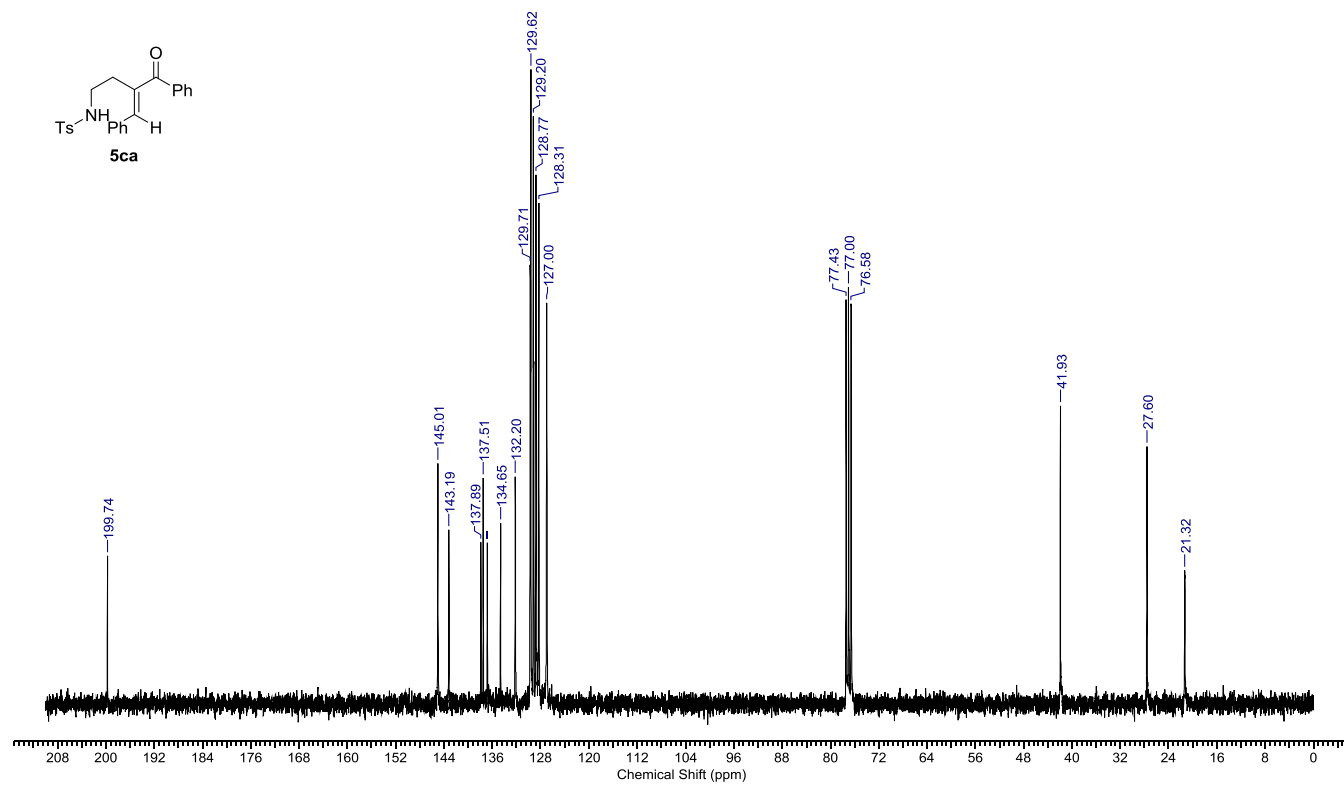

### <sup>1</sup>H NMR of *E*-3da

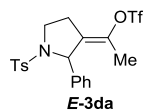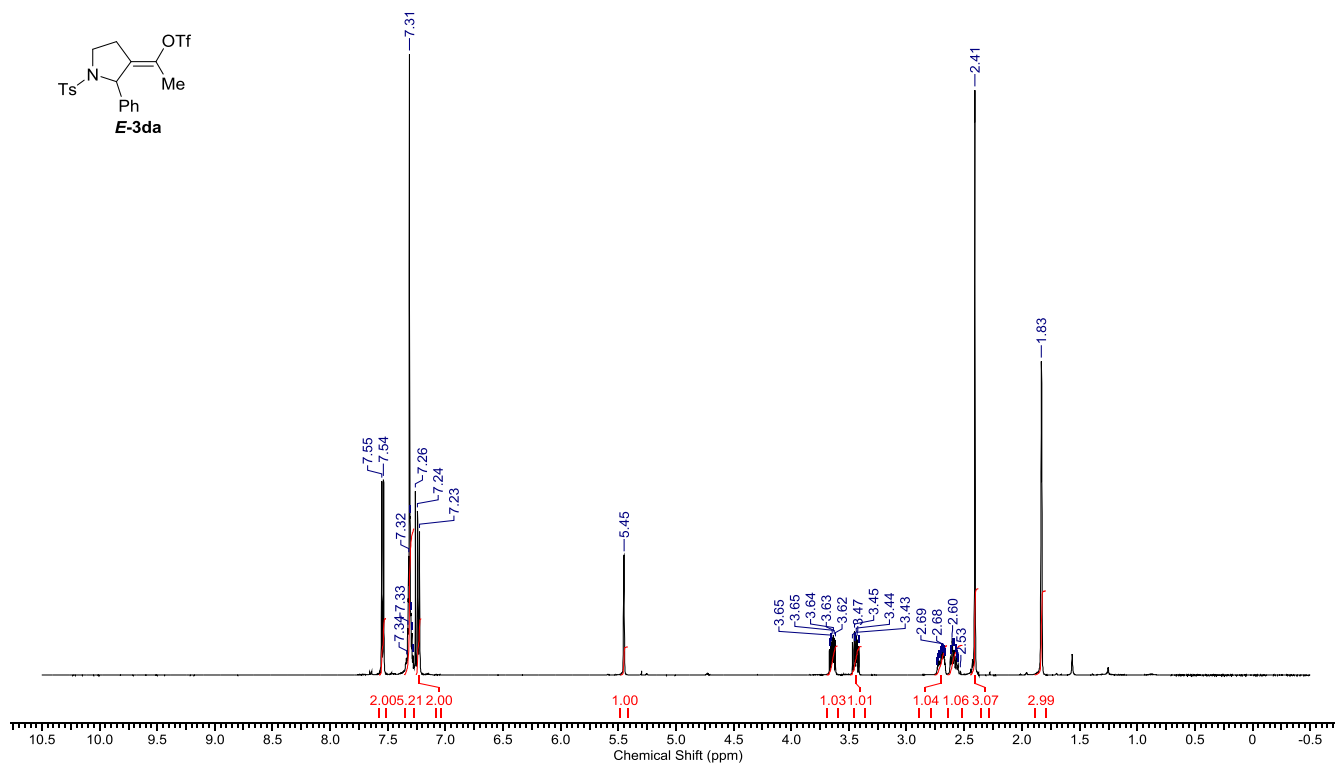

### <sup>13</sup>C NMR of *E*-3da

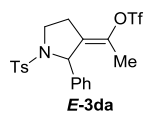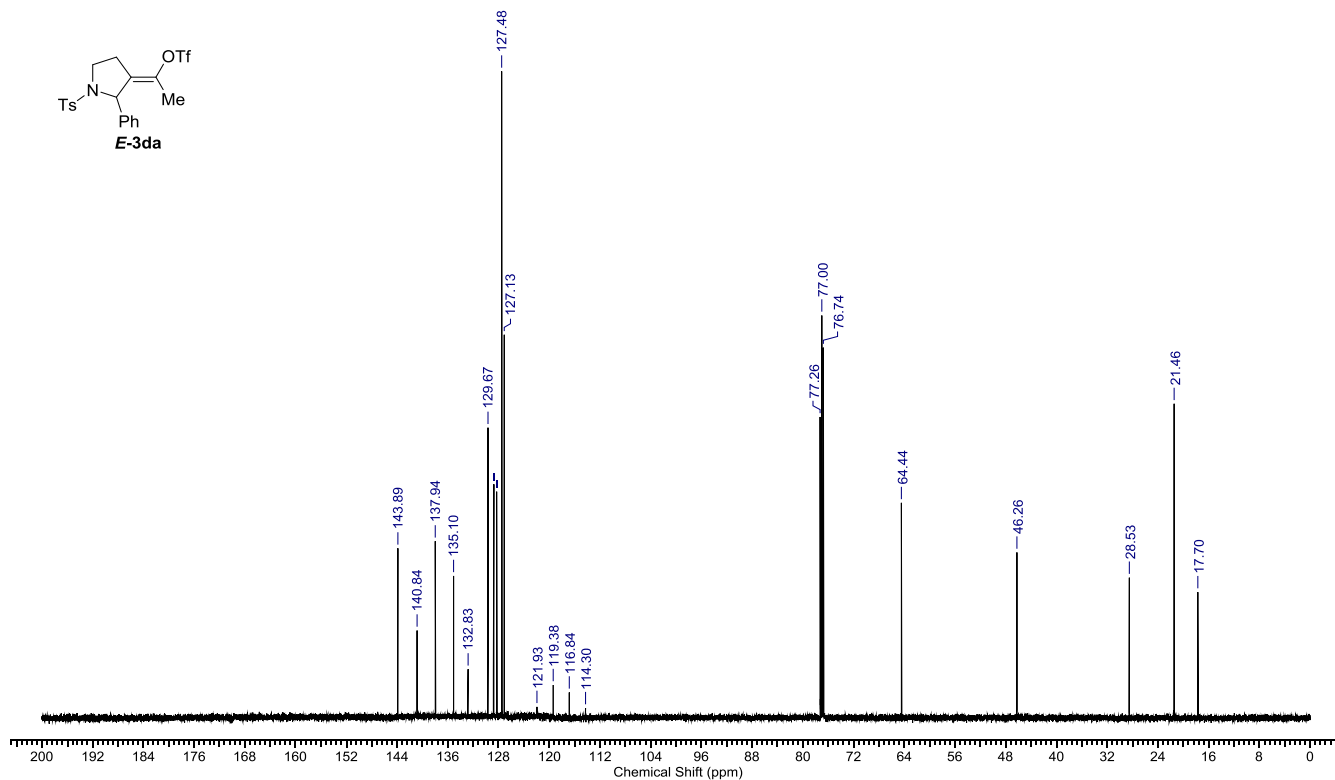

### <sup>1</sup>H NMR of Z-3da

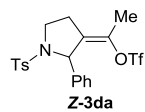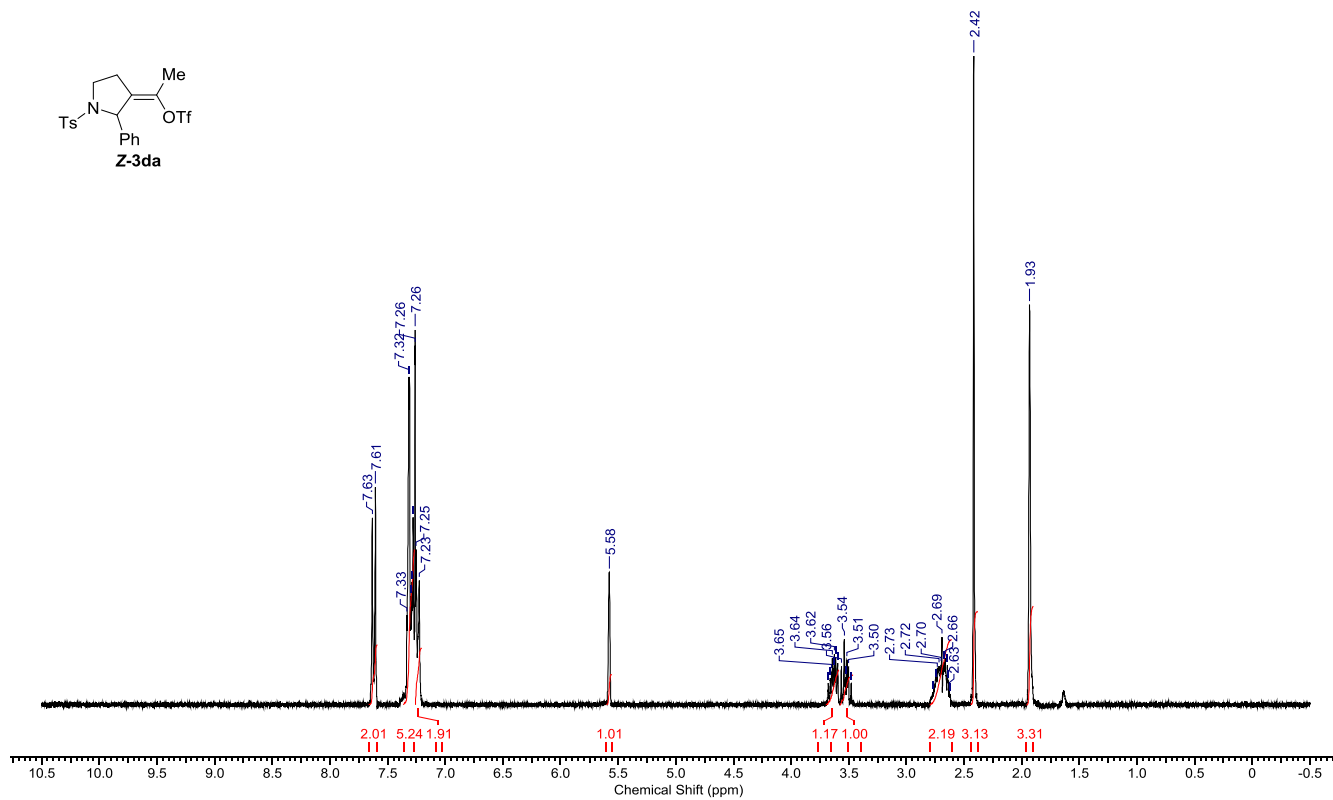

### <sup>13</sup>C NMR of Z-3da

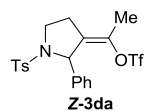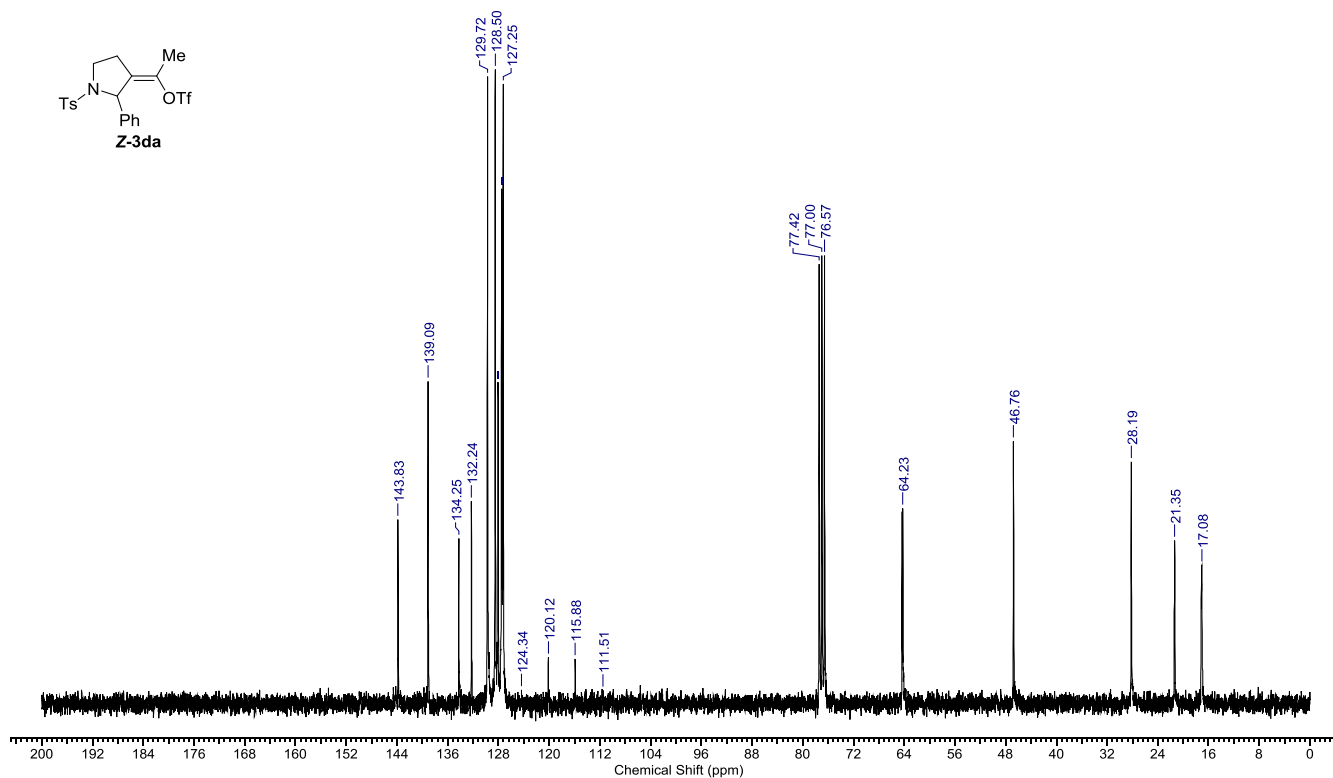

<sup>1</sup>H NMR of **4aa** (mixture of *E* and *Z* isomers)

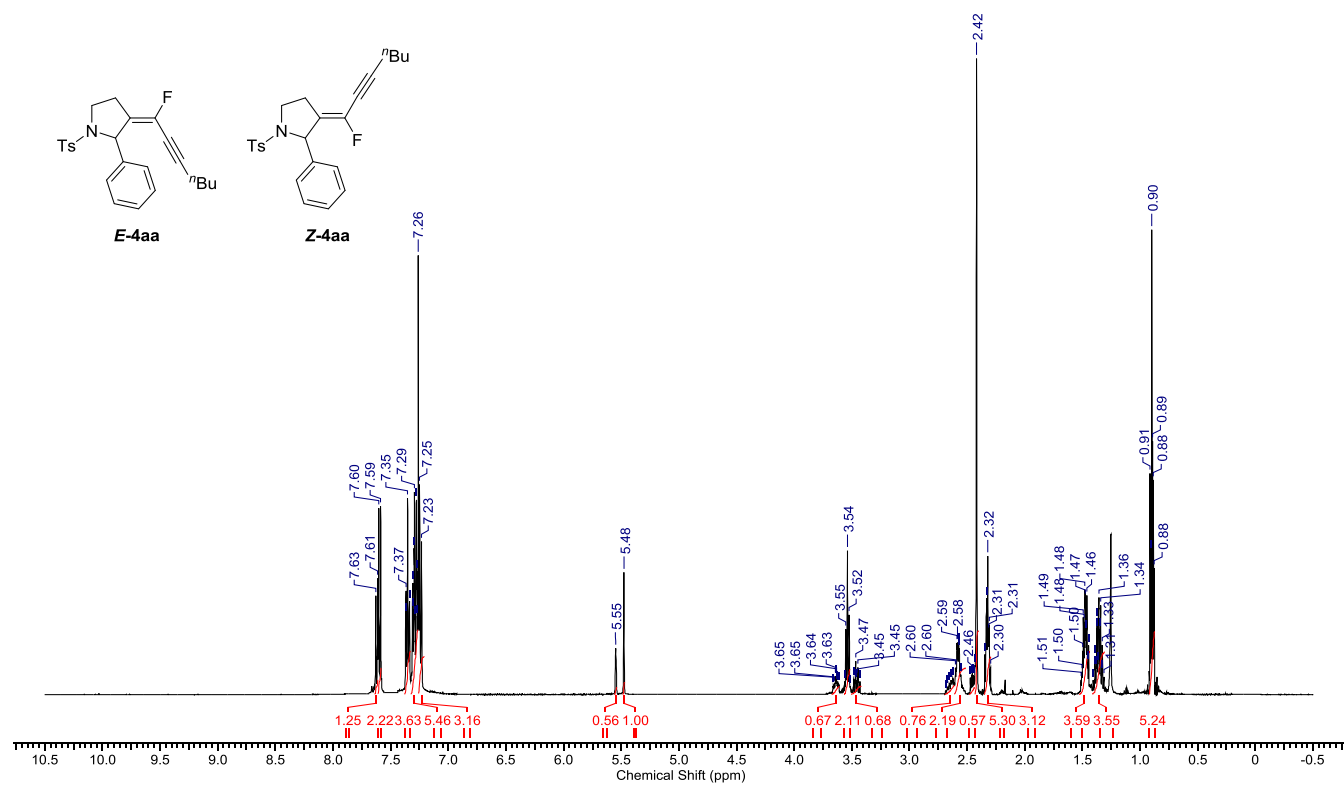

<sup>13</sup>C NMR of **4aa** (mixture of *E* and *Z* isomers)

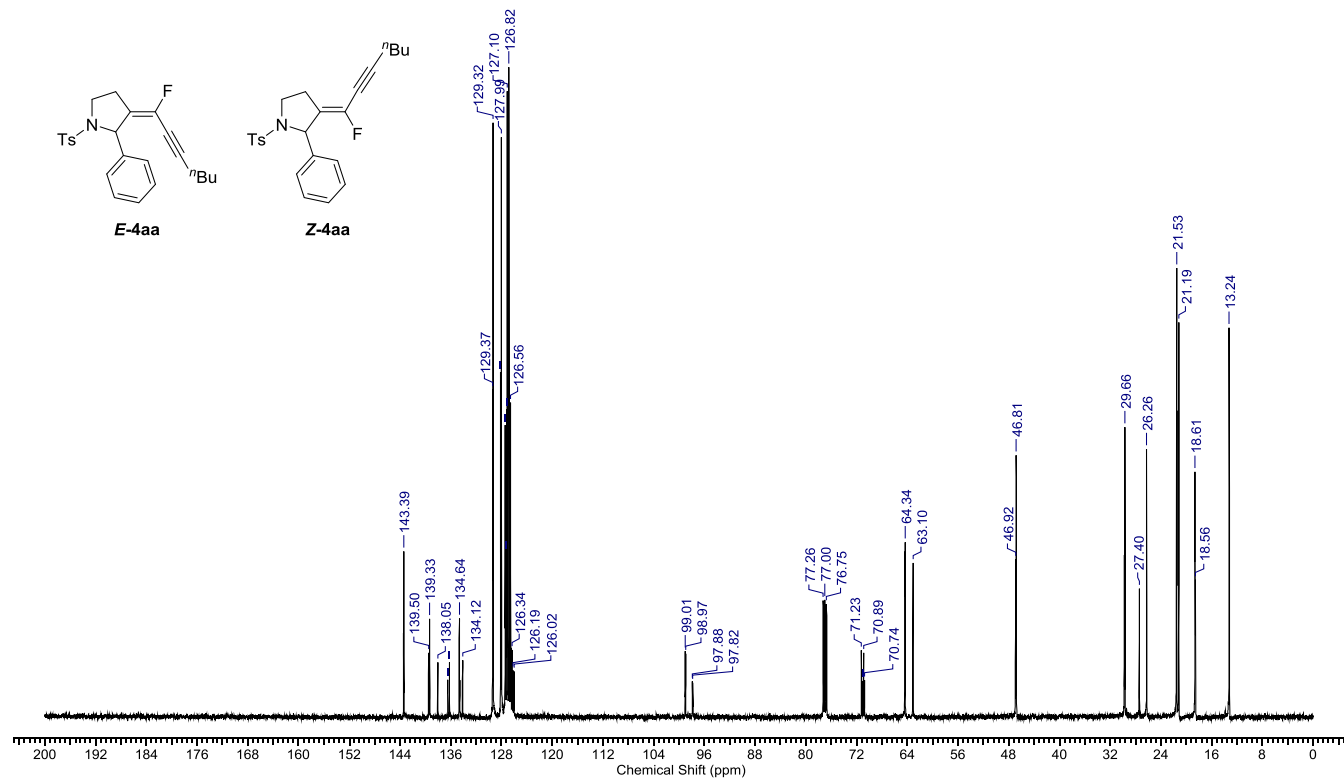

<sup>1</sup>H NMR of **6aa** (mixture of *E* and *Z* isomers)

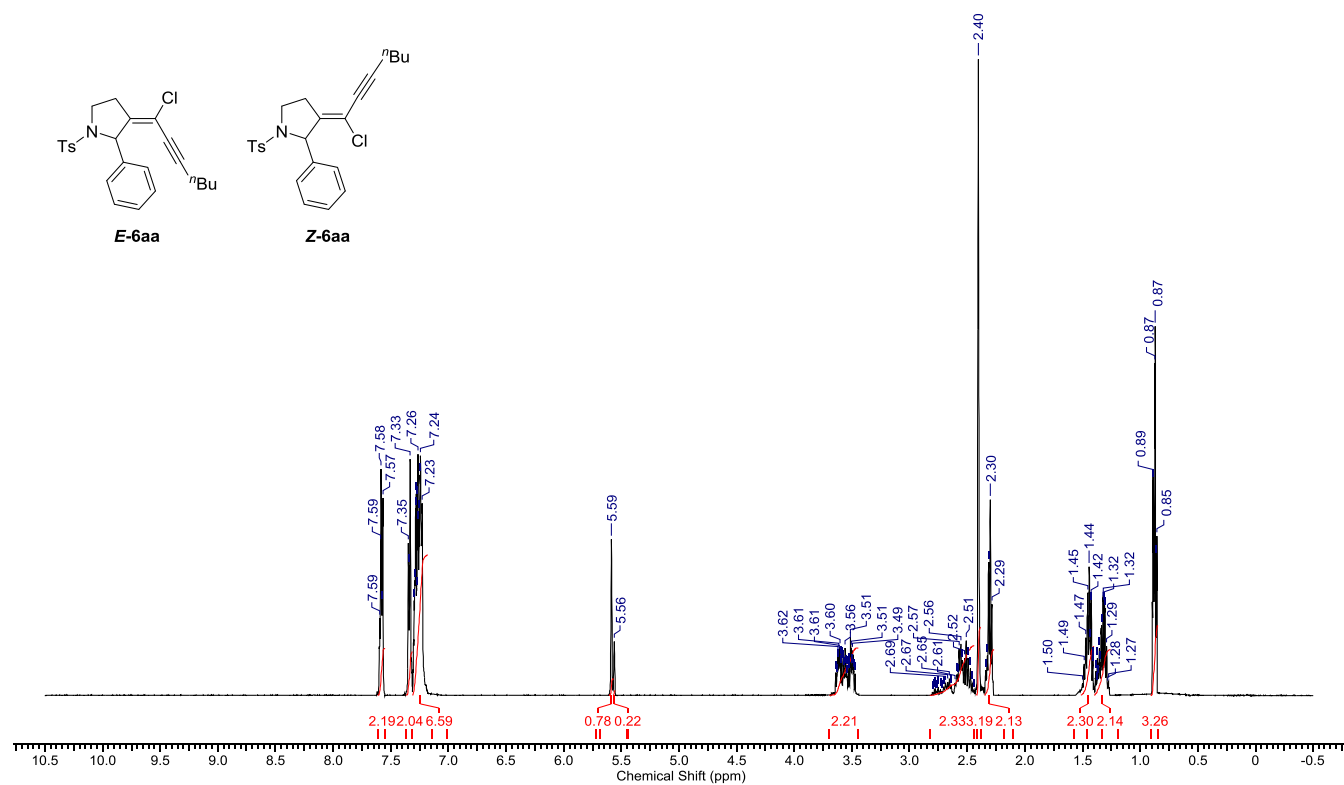

<sup>13</sup>C NMR of **6aa** (mixture of *E* and *Z* isomers)

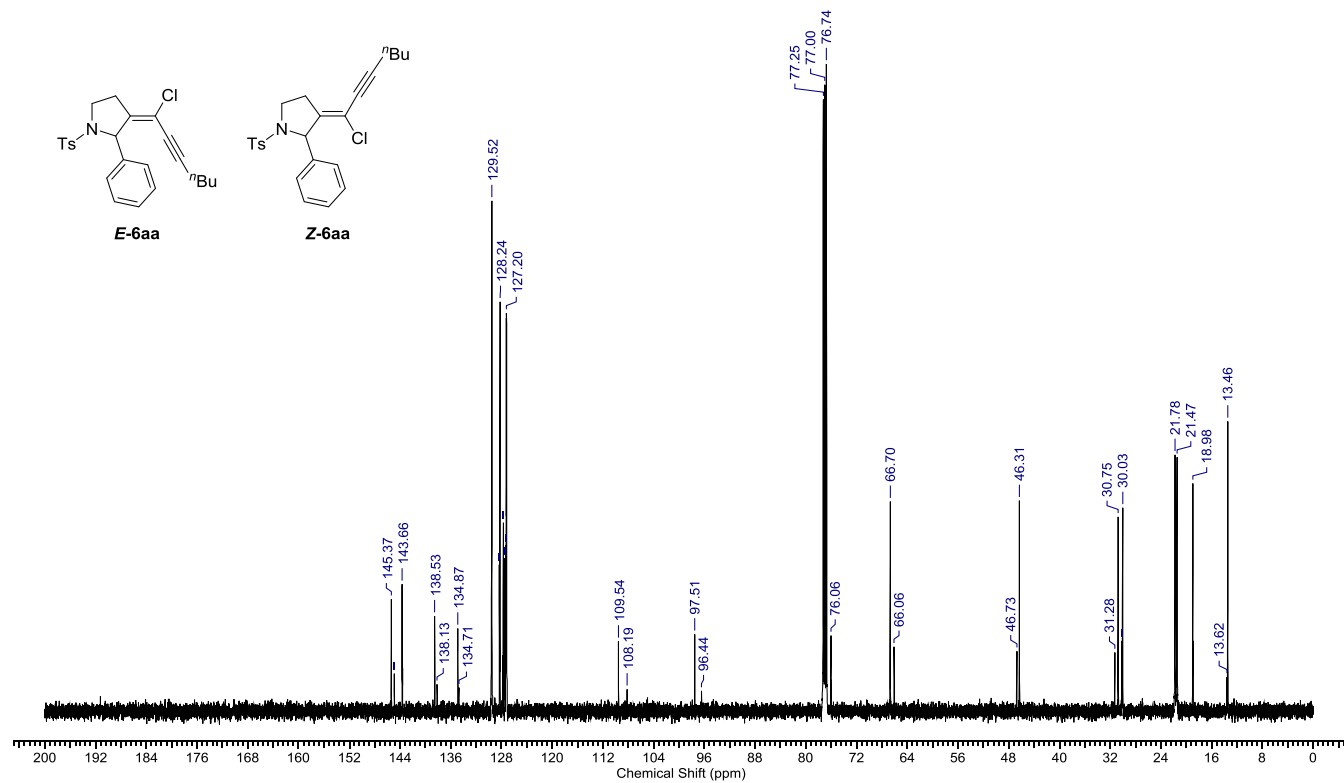

# <sup>1</sup>H NMR of 7

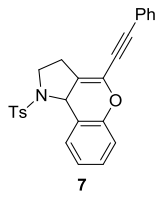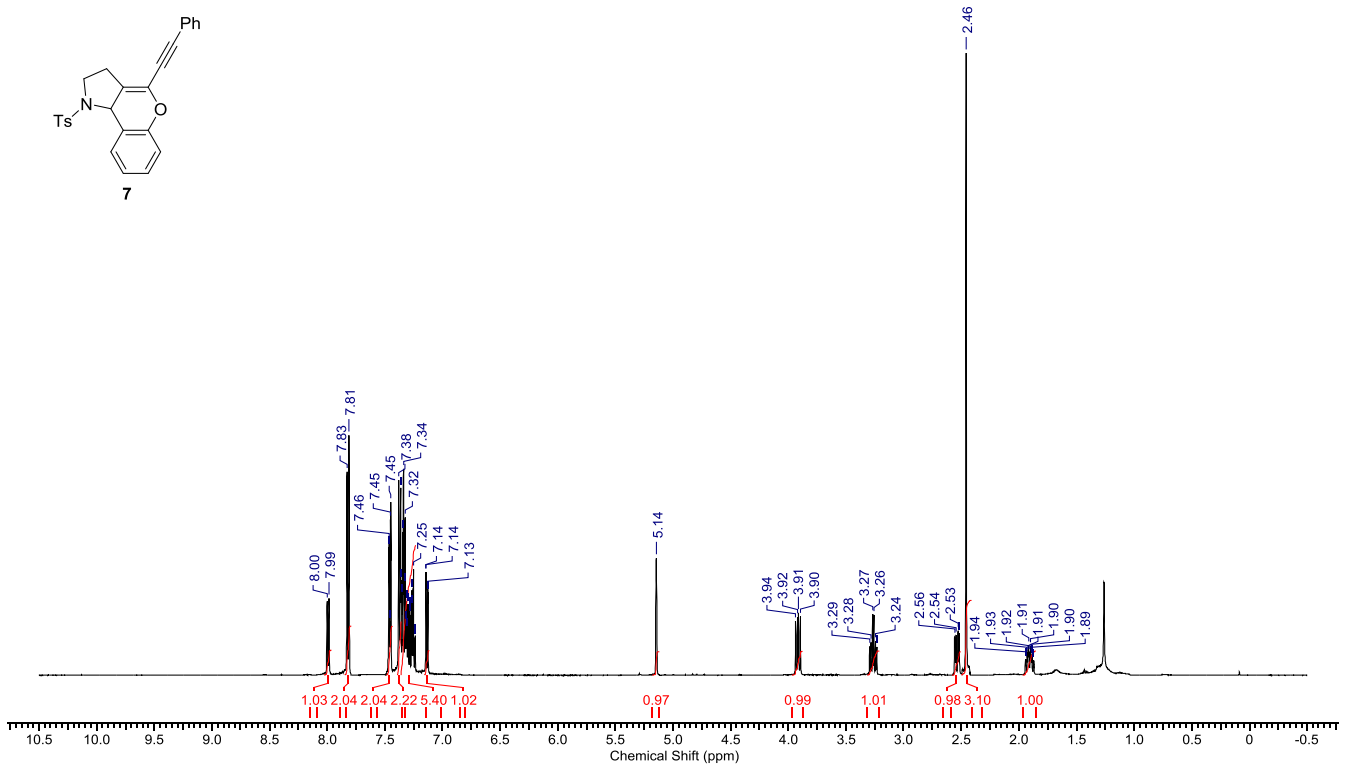

# <sup>13</sup>C NMR of 7

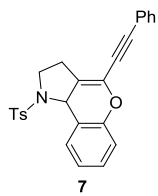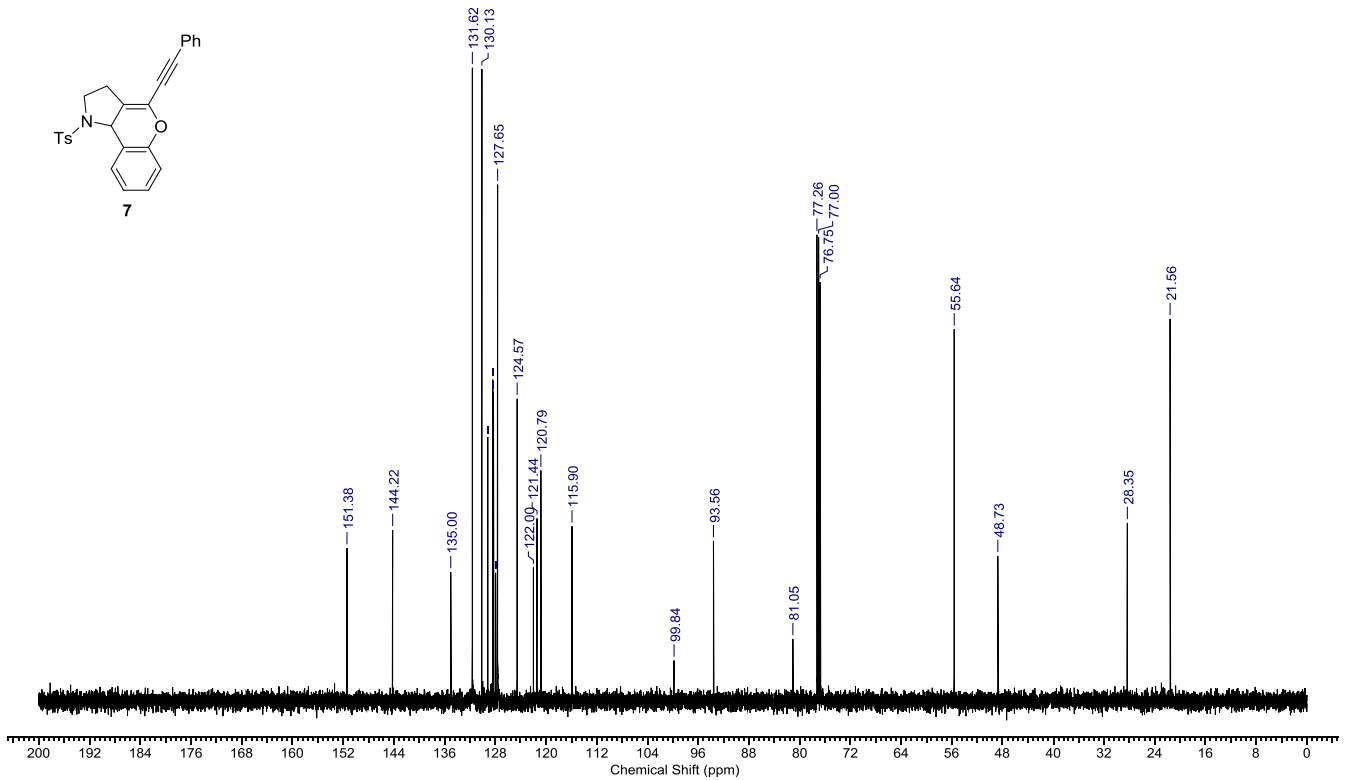



### <sup>1</sup>H NMR of **8**

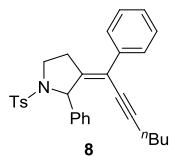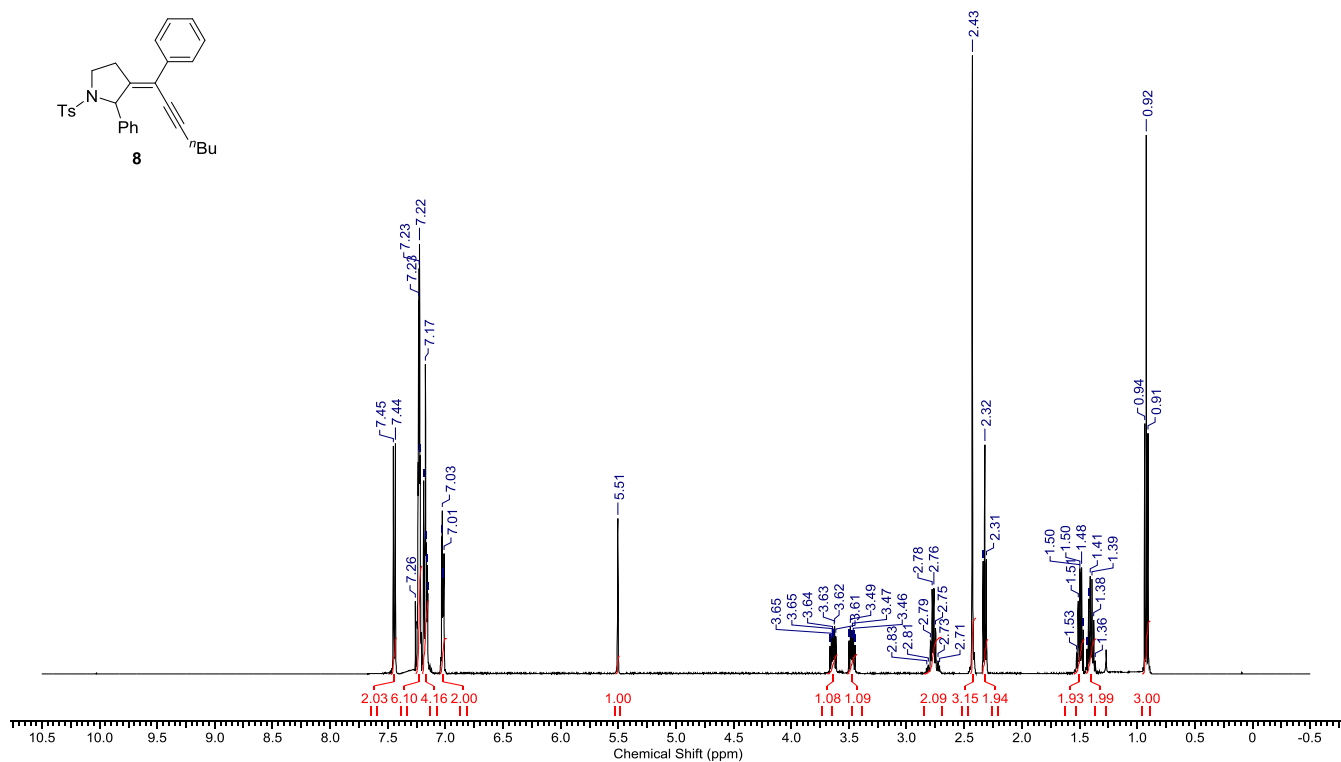

### <sup>13</sup>C NMR of **8**

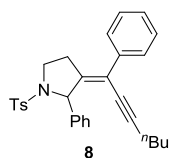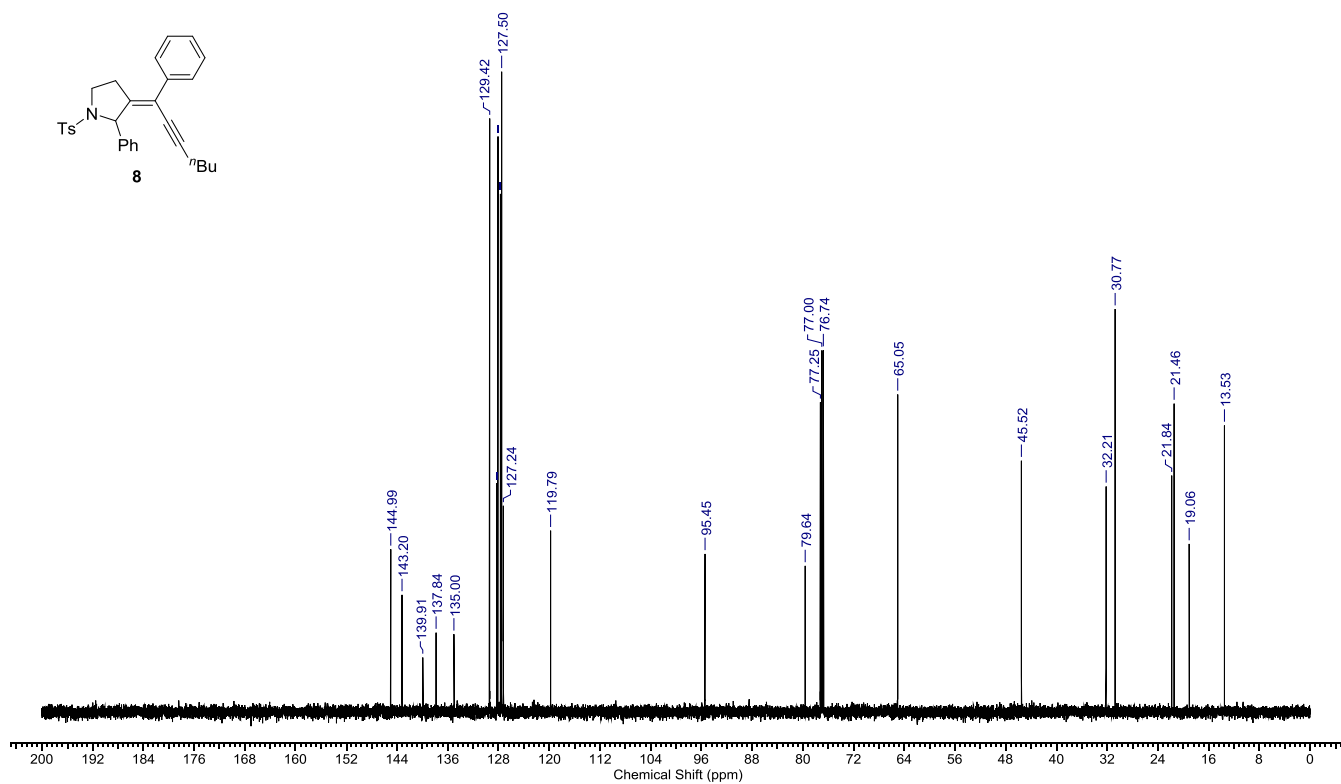

### <sup>1</sup>H NMR of **9**

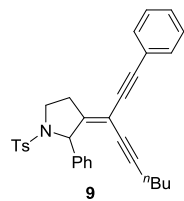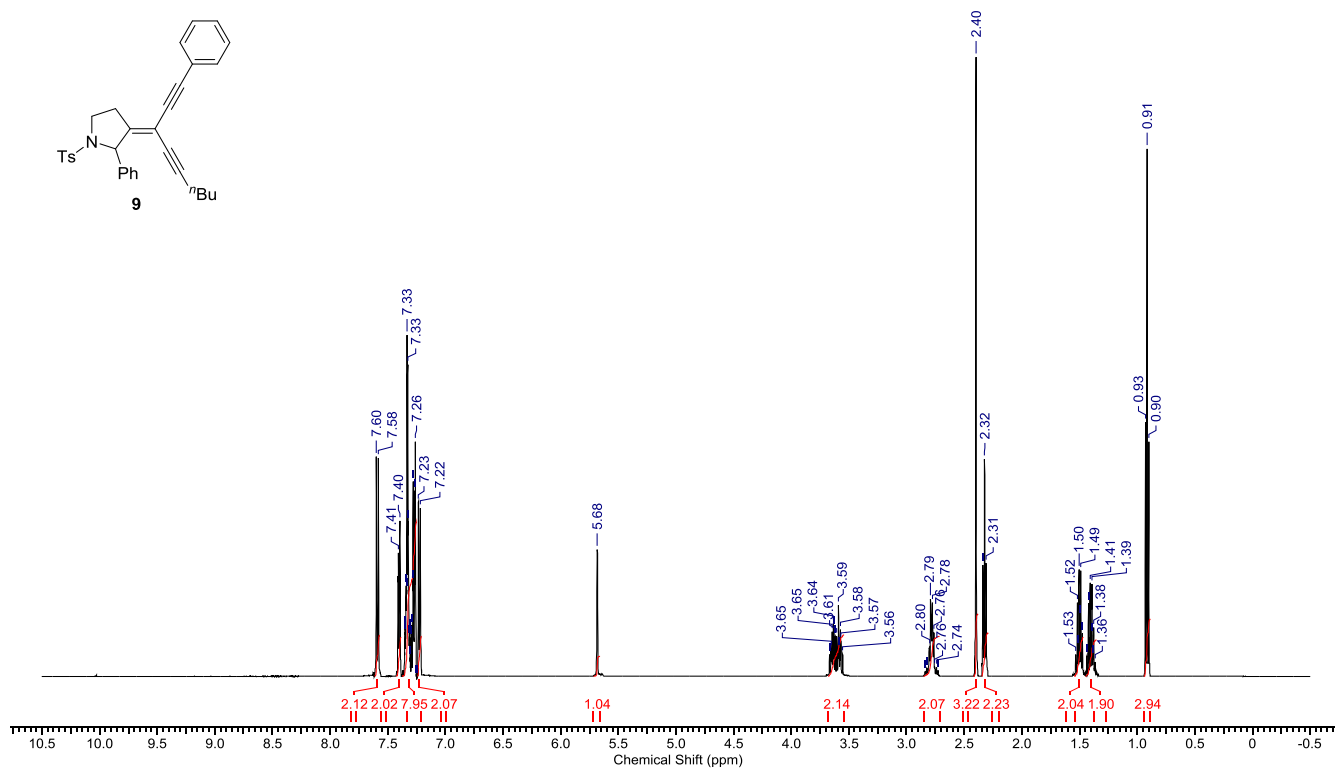

### <sup>13</sup>C NMR of **9**

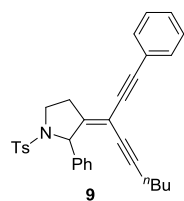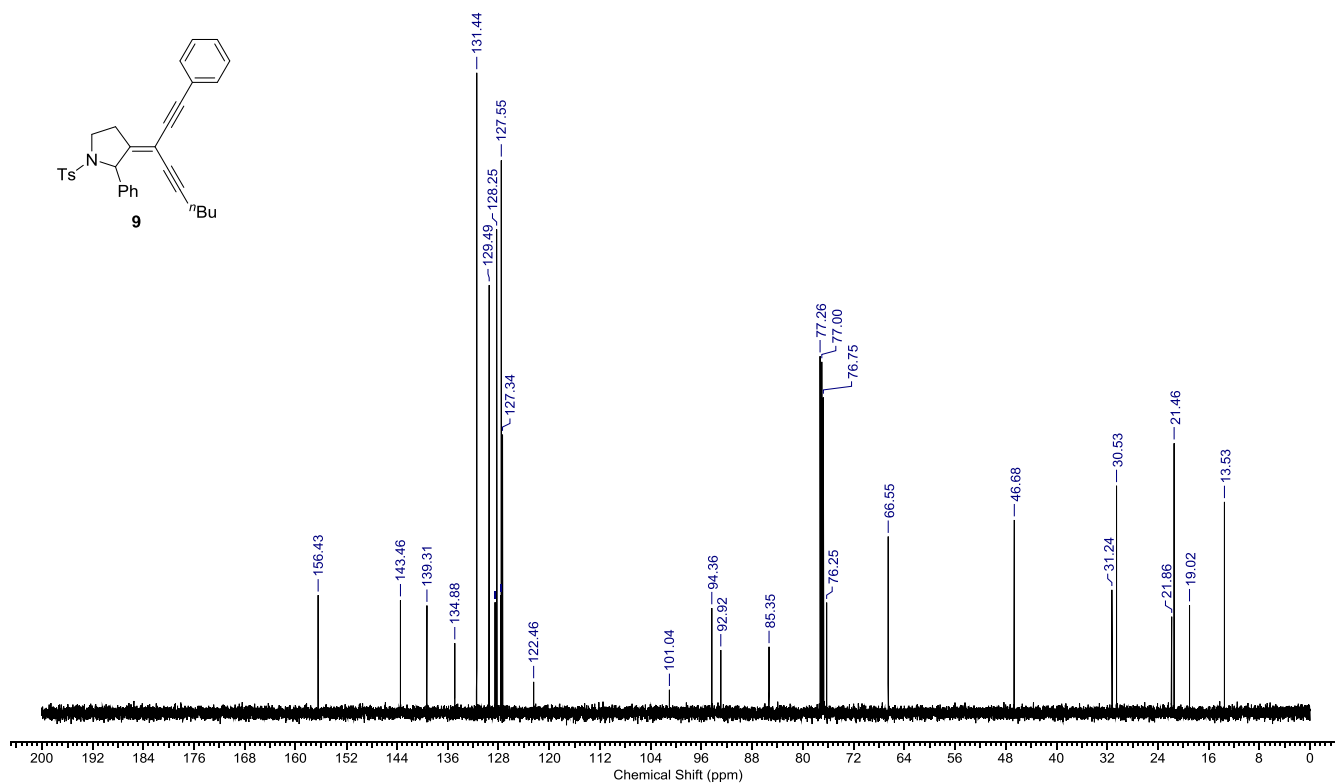

## Cartesian Coordinates and Absolute Electronic Energies of Intermediates and Transition States

### INT1

SCF Done: E(RB3LYP) = -992.531991063 a.u.

Sum of electronic and thermal Free Energies= -992.353060 a.u.

| Center<br>Number | Atomic<br>Number | Atomic<br>Type | Coordinates (Angstroms) |           |           |
|------------------|------------------|----------------|-------------------------|-----------|-----------|
|                  |                  |                | X                       | Y         | Z         |
| 1                | 6                | 0              | -2.137332               | -0.419958 | -0.519068 |
| 2                | 6                | 0              | -0.710923               | -0.610285 | -0.760851 |
| 3                | 6                | 0              | 0.092582                | -0.427631 | 0.545286  |
| 4                | 1                | 0              | -0.528590               | -1.616359 | -1.160828 |
| 5                | 1                | 0              | -0.360439               | 0.105299  | -1.514347 |
| 6                | 1                | 0              | -0.060631               | 0.569384  | 0.955801  |
| 7                | 1                | 0              | -0.198782               | -1.163647 | 1.296695  |
| 8                | 7                | 0              | 1.555986                | -0.606557 | 0.304048  |
| 9                | 16               | 0              | 2.501791                | 0.947554  | -0.166973 |
| 10               | 8                | 0              | 3.387007                | 0.545581  | -1.250764 |
| 11               | 8                | 0              | 1.439203                | 1.923221  | -0.358238 |
| 12               | 6                | 0              | 3.416306                | 1.284326  | 1.341291  |
| 13               | 1                | 0              | 2.706537                | 1.441652  | 2.154539  |
| 14               | 1                | 0              | 4.095600                | 0.455286  | 1.539950  |
| 15               | 1                | 0              | 3.977670                | 2.199867  | 1.132667  |
| 16               | 6                | 0              | -3.323951               | -0.249158 | -0.304302 |
| 17               | 6                | 0              | -4.659927               | -0.059273 | -0.074692 |
| 18               | 6                | 0              | -5.849283               | 0.111414  | 0.127204  |
| 19               | 6                | 0              | -7.272903               | 0.316423  | 0.365017  |
| 20               | 1                | 0              | -7.743510               | 0.817569  | -0.489196 |
| 21               | 1                | 0              | -7.786545               | -0.639410 | 0.522228  |
| 22               | 1                | 0              | -7.435654               | 0.938578  | 1.253138  |
| 23               | 6                | 0              | 2.096330                | -1.782578 | 0.342412  |
| 24               | 1                | 0              | 1.405183                | -2.588479 | 0.595490  |
| 25               | 6                | 0              | 3.496931                | -2.187046 | 0.104448  |
| 26               | 1                | 0              | 4.191788                | -1.382062 | -0.118109 |
| 27               | 1                | 0              | 3.829491                | -2.760718 | 0.979421  |
| 28               | 1                | 0              | 3.490666                | -2.899733 | -0.732674 |

### OTf<sup>-</sup>

SCF Done: E(RB3LYP) = -961.629263842 a.u.

Sum of electronic and thermal Free Energies= -961.635441 a.u.

| Center<br>Number | Atomic<br>Number | Atomic<br>Type | Coordinates (Angstroms) |           |           |
|------------------|------------------|----------------|-------------------------|-----------|-----------|
|                  |                  |                | X                       | Y         | Z         |
| 1                | 16               | 0              | 0.922311                | 0.000380  | 0.000000  |
| 2                | 8                | 0              | 1.253525                | -0.723164 | -1.252310 |
| 3                | 8                | 0              | 1.253527                | -0.723631 | 1.252041  |
| 4                | 6                | 0              | -0.959967               | 0.000227  | 0.000000  |
| 5                | 8                | 0              | 1.254591                | 1.446338  | 0.000268  |
| 6                | 9                | 0              | -1.446758               | -1.258832 | -0.000217 |

|   |   |   |           |          |           |
|---|---|---|-----------|----------|-----------|
| 7 | 9 | 0 | -1.448306 | 0.629018 | 1.089817  |
| 8 | 9 | 0 | -1.448305 | 0.629393 | -1.089600 |

**TS1**

SCF Done: E(RB3LYP) = -992.518154903 a.u.

Sum of electronic and thermal Free Energies= -992.337839 a.u.

| Center<br>Number | Atomic<br>Number | Atomic<br>Type | Coordinates (Angstroms) |           |           |
|------------------|------------------|----------------|-------------------------|-----------|-----------|
|                  |                  |                | X                       | Y         | Z         |
| 1                | 6                | 0              | 0.096816                | 0.518504  | 1.043055  |
| 2                | 6                | 0              | -0.898416               | 1.087624  | -0.658192 |
| 3                | 6                | 0              | 0.193038                | 1.806581  | -1.349076 |
| 4                | 6                | 0              | 1.471437                | 1.758182  | -0.450114 |
| 5                | 1                | 0              | -0.220957               | -0.489251 | 1.300087  |
| 6                | 1                | 0              | 0.385713                | 1.310856  | -2.306625 |
| 7                | 1                | 0              | -0.096031               | 2.841481  | -1.560631 |
| 8                | 1                | 0              | 2.381726                | 1.672416  | -1.041212 |
| 9                | 1                | 0              | 1.552202                | 2.646255  | 0.177967  |
| 10               | 7                | 0              | 1.309558                | 0.580490  | 0.421442  |
| 11               | 16               | 0              | 2.024370                | -0.950787 | -0.136711 |
| 12               | 8                | 0              | 1.184459                | -2.012984 | 0.422088  |
| 13               | 8                | 0              | 2.225048                | -0.829648 | -1.582602 |
| 14               | 6                | 0              | 3.604782                | -0.912091 | 0.710518  |
| 15               | 1                | 0              | 4.156372                | -0.027088 | 0.390053  |
| 16               | 1                | 0              | 3.416076                | -0.904292 | 1.784776  |
| 17               | 1                | 0              | 4.129122                | -1.823025 | 0.409858  |
| 18               | 6                | 0              | -0.334526               | 1.602611  | 1.993048  |
| 19               | 1                | 0              | -0.152254               | 2.614864  | 1.629561  |
| 20               | 1                | 0              | -1.393712               | 1.489024  | 2.230699  |
| 21               | 1                | 0              | 0.242205                | 1.455597  | 2.917777  |
| 22               | 6                | 0              | -2.019020               | 0.559331  | -0.553898 |
| 23               | 6                | 0              | -3.202808               | -0.041128 | -0.329227 |
| 24               | 6                | 0              | -4.279520               | -0.588713 | -0.132714 |
| 25               | 6                | 0              | -5.555169               | -1.237538 | 0.089101  |
| 26               | 1                | 0              | -6.221707               | -1.039224 | -0.760185 |
| 27               | 1                | 0              | -5.433091               | -2.322926 | 0.178942  |
| 28               | 1                | 0              | -6.038228               | -0.854646 | 0.995325  |

**INT2**

SCF Done: E(RB3LYP) = -992.530024000 a.u.

Sum of electronic and thermal Free Energies= -992.348614 a.u.

| Center<br>Number | Atomic<br>Number | Atomic<br>Type | Coordinates (Angstroms) |          |           |
|------------------|------------------|----------------|-------------------------|----------|-----------|
|                  |                  |                | X                       | Y        | Z         |
| 1                | 6                | 0              | -0.074274               | 0.627809 | -0.832586 |
| 2                | 6                | 0              | 0.936053                | 0.613437 | 0.374808  |
| 3                | 6                | 0              | 0.204129                | 1.062956 | 1.633382  |

|    |    |   |           |           |           |
|----|----|---|-----------|-----------|-----------|
| 4  | 6  | 0 | -1.198594 | 1.451163  | 1.093394  |
| 5  | 1  | 0 | 0.004693  | -0.285580 | -1.422697 |
| 6  | 1  | 0 | 0.141352  | 0.216555  | 2.325556  |
| 7  | 1  | 0 | 0.717583  | 1.885646  | 2.138231  |
| 8  | 1  | 0 | -1.988638 | 1.228409  | 1.810058  |
| 9  | 1  | 0 | -1.238117 | 2.515593  | 0.846973  |
| 10 | 7  | 0 | -1.366907 | 0.678928  | -0.150834 |
| 11 | 16 | 0 | -2.257750 | -0.799798 | -0.037145 |
| 12 | 8  | 0 | -1.734778 | -1.685321 | -1.089287 |
| 13 | 8  | 0 | -2.278918 | -1.263886 | 1.360417  |
| 14 | 6  | 0 | -3.909375 | -0.259254 | -0.488466 |
| 15 | 1  | 0 | -4.242993 | 0.496577  | 0.224588  |
| 16 | 1  | 0 | -3.875275 | 0.139562  | -1.502913 |
| 17 | 1  | 0 | -4.548221 | -1.143973 | -0.434723 |
| 18 | 6  | 0 | 0.167953  | 1.857194  | -1.718889 |
| 19 | 1  | 0 | 0.115201  | 2.792305  | -1.154389 |
| 20 | 1  | 0 | 1.153640  | 1.787434  | -2.188525 |
| 21 | 1  | 0 | -0.596183 | 1.875515  | -2.502034 |
| 22 | 6  | 0 | 2.162762  | 0.236450  | 0.270035  |
| 23 | 6  | 0 | 3.409826  | -0.158738 | 0.128118  |
| 24 | 6  | 0 | 4.580671  | -0.533379 | -0.003980 |
| 25 | 6  | 0 | 5.935962  | -0.981419 | -0.148141 |
| 26 | 1  | 0 | 6.303922  | -1.311287 | 0.835375  |
| 27 | 1  | 0 | 5.970136  | -1.860006 | -0.807064 |
| 28 | 1  | 0 | 6.594140  | -0.196147 | -0.533381 |

-----

**TS2a\_E**

SCF Done: E(RB3LYP) = -1954.17399126 a.u.

Sum of electronic and thermal Free Energies= -1953.980627 a.u.

-----

| Center<br>Number | Atomic<br>Number | Atomic<br>Type | Coordinates (Angstroms) |           |           |
|------------------|------------------|----------------|-------------------------|-----------|-----------|
|                  |                  |                | X                       | Y         | Z         |
| 1                | 6                | 0              | -2.345866               | 0.700337  | 1.028681  |
| 2                | 6                | 0              | -1.011602               | 0.160022  | 0.415504  |
| 3                | 6                | 0              | -1.155471               | -1.324132 | 0.151854  |
| 4                | 6                | 0              | -2.562567               | -1.652029 | 0.703097  |
| 5                | 1                | 0              | -2.656069               | 1.633152  | 0.557173  |
| 6                | 1                | 0              | -1.095729               | -1.498096 | -0.927026 |
| 7                | 1                | 0              | -0.356585               | -1.899950 | 0.623881  |
| 8                | 1                | 0              | -3.077288               | -2.404229 | 0.104889  |
| 9                | 1                | 0              | -2.510584               | -2.010119 | 1.735123  |
| 10               | 7                | 0              | -3.303281               | -0.369391 | 0.702493  |
| 11               | 16               | 0              | -4.351368               | -0.092185 | -0.630288 |
| 12               | 8                | 0              | -4.514565               | 1.367532  | -0.739120 |
| 13               | 8                | 0              | -3.912961               | -0.855994 | -1.813126 |
| 14               | 6                | 0              | -5.884639               | -0.813063 | -0.033236 |
| 15               | 1                | 0              | -5.721155               | -1.871826 | 0.175438  |
| 16               | 1                | 0              | -6.192429               | -0.275777 | 0.864357  |
| 17               | 1                | 0              | -6.616190               | -0.691940 | -0.835822 |

|    |    |   |           |           |           |
|----|----|---|-----------|-----------|-----------|
| 18 | 6  | 0 | -2.215564 | 0.898587  | 2.545037  |
| 19 | 1  | 0 | -1.889491 | -0.014110 | 3.052696  |
| 20 | 1  | 0 | -1.488990 | 1.689583  | 2.755260  |
| 21 | 1  | 0 | -3.188305 | 1.197435  | 2.947985  |
| 22 | 6  | 0 | -0.025323 | 0.968127  | 0.179491  |
| 23 | 6  | 0 | 0.784231  | 2.001286  | 0.036928  |
| 24 | 6  | 0 | 1.611572  | 2.898801  | -0.141296 |
| 25 | 6  | 0 | 2.563645  | 3.955934  | -0.353098 |
| 26 | 1  | 0 | 3.432087  | 3.514112  | -0.863279 |
| 27 | 1  | 0 | 2.152891  | 4.739160  | -1.000964 |
| 28 | 1  | 0 | 2.905276  | 4.391092  | 0.592784  |
| 29 | 16 | 0 | 3.023114  | -0.523037 | -0.966465 |
| 30 | 8  | 0 | 1.564617  | -0.728623 | -0.710470 |
| 31 | 8  | 0 | 3.417460  | 0.889132  | -1.178687 |
| 32 | 8  | 0 | 3.617518  | -1.506231 | -1.893074 |
| 33 | 6  | 0 | 3.800374  | -0.947963 | 0.693076  |
| 34 | 9  | 0 | 5.136534  | -0.793434 | 0.648213  |
| 35 | 9  | 0 | 3.320298  | -0.147122 | 1.666469  |
| 36 | 9  | 0 | 3.537425  | -2.222908 | 1.037282  |

**TS2b\_E**

SCF Done: E(RB3LYP) = -1954.17410048 a.u.

Sum of electronic and thermal Free Energies= -1953.980455 a.u.

| Center<br>Number | Atomic<br>Number | Atomic<br>Type | Coordinates (Angstroms) |           |           |
|------------------|------------------|----------------|-------------------------|-----------|-----------|
|                  |                  |                | X                       | Y         | Z         |
| 1                | 6                | 0              | -2.564629               | 0.847003  | 0.849877  |
| 2                | 6                | 0              | -1.230951               | 0.311735  | 0.267073  |
| 3                | 6                | 0              | -1.359190               | -1.178771 | -0.006714 |
| 4                | 6                | 0              | -2.685710               | -1.537842 | 0.697172  |
| 5                | 1                | 0              | -2.925949               | 1.704996  | 0.280713  |
| 6                | 1                | 0              | -1.440541               | -1.330176 | -1.089300 |
| 7                | 1                | 0              | -0.496612               | -1.744822 | 0.350828  |
| 8                | 1                | 0              | -3.209985               | -2.356876 | 0.204177  |
| 9                | 1                | 0              | -2.516097               | -1.813480 | 1.742222  |
| 10               | 7                | 0              | -3.488039               | -0.293994 | 0.674606  |
| 11               | 16               | 0              | -4.672556               | -0.163598 | -0.556262 |
| 12               | 8                | 0              | -4.876983               | 1.275129  | -0.799768 |
| 13               | 8                | 0              | -4.347954               | -1.045899 | -1.693002 |
| 14               | 6                | 0              | -6.125877               | -0.826130 | 0.266575  |
| 15               | 1                | 0              | -5.923113               | -1.854481 | 0.570865  |
| 16               | 1                | 0              | -6.350086               | -0.196831 | 1.128478  |
| 17               | 1                | 0              | -6.937712               | -0.797630 | -0.463990 |
| 18               | 6                | 0              | -2.422882               | 1.230059  | 2.329848  |
| 19               | 1                | 0              | -2.069480               | 0.389481  | 2.934899  |
| 20               | 1                | 0              | -1.711782               | 2.055818  | 2.435023  |
| 21               | 1                | 0              | -3.396794               | 1.553083  | 2.710220  |
| 22               | 6                | 0              | -0.180450               | 1.044514  | 0.052723  |
| 23               | 6                | 0              | 0.843913                | 1.822350  | -0.143759 |

|    |    |   |          |           |           |
|----|----|---|----------|-----------|-----------|
| 24 | 6  | 0 | 1.887512 | 2.472973  | -0.361241 |
| 25 | 6  | 0 | 2.877801 | 3.509457  | -0.519345 |
| 26 | 1  | 0 | 3.731980 | 3.360212  | 0.148012  |
| 27 | 1  | 0 | 3.225891 | 3.572389  | -1.555345 |
| 28 | 1  | 0 | 2.389362 | 4.460987  | -0.260040 |
| 29 | 16 | 0 | 3.257583 | -0.589903 | -0.896410 |
| 30 | 8  | 0 | 1.871315 | -1.060511 | -0.689702 |
| 31 | 8  | 0 | 3.382214 | 0.889267  | -1.128910 |
| 32 | 8  | 0 | 4.099026 | -1.398100 | -1.797801 |
| 33 | 6  | 0 | 4.060303 | -0.812427 | 0.790243  |
| 34 | 9  | 0 | 5.348221 | -0.425170 | 0.764679  |
| 35 | 9  | 0 | 3.421863 | -0.079426 | 1.724144  |
| 36 | 9  | 0 | 4.015113 | -2.102659 | 1.169232  |

**TS2a\_z**

SCF Done: E(RB3LYP) = -1954.17325527 a.u.

Sum of electronic and thermal Free Energies= -1953.979562 a.u.

| Center<br>Number | Atomic<br>Number | Atomic<br>Type | Coordinates (Angstroms) |           |           |
|------------------|------------------|----------------|-------------------------|-----------|-----------|
|                  |                  |                | X                       | Y         | Z         |
| 1                | 6                | 0              | 1.605756                | 0.317060  | 1.011156  |
| 2                | 6                | 0              | 1.011239                | 1.510622  | 0.239730  |
| 3                | 6                | 0              | 2.152465                | 2.396330  | -0.274672 |
| 4                | 6                | 0              | 3.403289                | 1.738306  | 0.359296  |
| 5                | 1                | 0              | 1.132174                | -0.615743 | 0.710876  |
| 6                | 1                | 0              | 2.189347                | 2.334351  | -1.367177 |
| 7                | 1                | 0              | 2.029637                | 3.444834  | 0.009098  |
| 8                | 1                | 0              | 4.277754                | 1.810228  | -0.287886 |
| 9                | 1                | 0              | 3.643321                | 2.200718  | 1.320854  |
| 10               | 7                | 0              | 3.028175                | 0.331613  | 0.605198  |
| 11               | 16               | 0              | 3.517481                | -0.806592 | -0.579947 |
| 12               | 8                | 0              | 2.553423                | -1.918213 | -0.535277 |
| 13               | 8                | 0              | 3.782280                | -0.134764 | -1.867417 |
| 14               | 6                | 0              | 5.087790                | -1.370696 | 0.086320  |
| 15               | 1                | 0              | 5.760122                | -0.516066 | 0.181607  |
| 16               | 1                | 0              | 4.902514                | -1.836295 | 1.054939  |
| 17               | 1                | 0              | 5.487829                | -2.094069 | -0.628120 |
| 18               | 6                | 0              | 1.469377                | 0.506697  | 2.529843  |
| 19               | 1                | 0              | 1.938958                | 1.434836  | 2.869984  |
| 20               | 1                | 0              | 0.411629                | 0.522902  | 2.800548  |
| 21               | 1                | 0              | 1.954341                | -0.335893 | 3.032827  |
| 22               | 6                | 0              | -0.230624               | 1.797629  | -0.011861 |
| 23               | 6                | 0              | -1.353098               | 2.367612  | -0.416738 |
| 24               | 6                | 0              | -2.449906               | 2.818070  | -0.753521 |
| 25               | 6                | 0              | -3.725731               | 3.355214  | -1.147065 |
| 26               | 1                | 0              | -4.500373               | 2.686087  | -0.745081 |
| 27               | 1                | 0              | -3.887658               | 4.354632  | -0.727217 |
| 28               | 1                | 0              | -3.832603               | 3.385009  | -2.237360 |
| 29               | 16               | 0              | -2.671119               | -0.596618 | 0.857300  |

|    |   |   |           |           |           |
|----|---|---|-----------|-----------|-----------|
| 30 | 8 | 0 | -1.253874 | -0.134490 | 1.010157  |
| 31 | 8 | 0 | -3.624532 | 0.467580  | 0.470404  |
| 32 | 8 | 0 | -3.114534 | -1.508604 | 1.928688  |
| 33 | 6 | 0 | -2.586506 | -1.695643 | -0.666378 |
| 34 | 9 | 0 | -3.798949 | -2.206573 | -0.949990 |
| 35 | 9 | 0 | -2.166504 | -0.994497 | -1.737548 |
| 36 | 9 | 0 | -1.733706 | -2.717236 | -0.473690 |

-----

**TS2b\_z**

SCF Done: E(RB3LYP) = -1954.17325527 a.u.

Sum of electronic and thermal Free Energies= -1953.979562 a.u.

-----

| Center<br>Number | Atomic<br>Number | Atomic<br>Type | Coordinates (Angstroms) |           |           |
|------------------|------------------|----------------|-------------------------|-----------|-----------|
|                  |                  |                | X                       | Y         | Z         |
| 1                | 6                | 0              | 1.764918                | 0.411110  | 0.933892  |
| 2                | 6                | 0              | 1.330287                | 1.626459  | 0.075243  |
| 3                | 6                | 0              | 2.570099                | 2.357207  | -0.425964 |
| 4                | 6                | 0              | 3.721929                | 1.613611  | 0.292866  |
| 5                | 1                | 0              | 1.212756                | -0.485823 | 0.655114  |
| 6                | 1                | 0              | 2.643802                | 2.233635  | -1.511967 |
| 7                | 1                | 0              | 2.542876                | 3.427465  | -0.202894 |
| 8                | 1                | 0              | 4.624754                | 1.561555  | -0.315564 |
| 9                | 1                | 0              | 3.969871                | 2.097978  | 1.241457  |
| 10               | 7                | 0              | 3.194542                | 0.264516  | 0.590328  |
| 11               | 16               | 0              | 3.614758                | -0.981168 | -0.512787 |
| 12               | 8                | 0              | 2.520742                | -1.966061 | -0.494898 |
| 13               | 8                | 0              | 4.043178                | -0.403309 | -1.801489 |
| 14               | 6                | 0              | 5.055862                | -1.702241 | 0.281989  |
| 15               | 1                | 0              | 5.824356                | -0.934491 | 0.387144  |
| 16               | 1                | 0              | 4.752683                | -2.092647 | 1.254114  |
| 17               | 1                | 0              | 5.403986                | -2.504665 | -0.372667 |
| 18               | 6                | 0              | 1.575896                | 0.690346  | 2.431870  |
| 19               | 1                | 0              | 2.100870                | 1.596060  | 2.751374  |
| 20               | 1                | 0              | 0.510149                | 0.803073  | 2.646625  |
| 21               | 1                | 0              | 1.963569                | -0.160075 | 3.001632  |
| 22               | 6                | 0              | 0.099196                | 1.940662  | -0.190480 |
| 23               | 6                | 0              | -1.124867               | 2.275582  | -0.478814 |
| 24               | 6                | 0              | -2.327618               | 2.514808  | -0.714253 |
| 25               | 6                | 0              | -3.574031               | 3.085516  | -1.163203 |
| 26               | 1                | 0              | -4.217182               | 3.354460  | -0.319356 |
| 27               | 1                | 0              | -3.325125               | 4.003246  | -1.717223 |
| 28               | 1                | 0              | -4.110573               | 2.407155  | -1.833549 |
| 29               | 16               | 0              | -2.857826               | -0.441273 | 0.881200  |
| 30               | 8                | 0              | -1.414545               | -0.341919 | 1.185341  |
| 31               | 8                | 0              | -3.471832               | 0.833699  | 0.375477  |
| 32               | 8                | 0              | -3.692274               | -1.138757 | 1.876912  |
| 33               | 6                | 0              | -2.921303               | -1.560685 | -0.628773 |
| 34               | 9                | 0              | -2.229189               | -1.021804 | -1.651075 |
| 35               | 9                | 0              | -4.190617               | -1.746676 | -1.035028 |



36 9 0 -2.388400 -2.762959 -0.348134

-----  
**PDa\_E**

SCF Done: E(RB3LYP) = -1954.21120381 a.u.

Sum of electronic and thermal Free Energies= -1954.013372 a.u.

-----

| Center<br>Number | Atomic<br>Number | Atomic<br>Type | Coordinates (Angstroms) |           |           |
|------------------|------------------|----------------|-------------------------|-----------|-----------|
|                  |                  |                | X                       | Y         | Z         |
| 1                | 6                | 0              | -1.931380               | 0.613037  | 0.790715  |
| 2                | 6                | 0              | -0.743351               | -0.205933 | 0.306976  |
| 3                | 6                | 0              | -1.121873               | -1.666412 | 0.232713  |
| 4                | 6                | 0              | -2.555285               | -1.702878 | 0.802785  |
| 5                | 1                | 0              | -2.095988               | 1.492744  | 0.165225  |
| 6                | 1                | 0              | -1.106671               | -2.003517 | -0.811060 |
| 7                | 1                | 0              | -0.441145               | -2.315218 | 0.793685  |
| 8                | 1                | 0              | -3.193495               | -2.428499 | 0.297383  |
| 9                | 1                | 0              | -2.552621               | -1.938116 | 1.871409  |
| 10               | 7                | 0              | -3.086005               | -0.322788 | 0.647017  |
| 11               | 16               | 0              | -4.130430               | -0.063755 | -0.669010 |
| 12               | 8                | 0              | -4.141895               | 1.388185  | -0.927958 |
| 13               | 8                | 0              | -3.838919               | -0.978398 | -1.793361 |
| 14               | 6                | 0              | -5.718566               | -0.541900 | 0.025561  |
| 15               | 1                | 0              | -5.669512               | -1.584642 | 0.344714  |
| 16               | 1                | 0              | -5.939636               | 0.116292  | 0.866392  |
| 17               | 1                | 0              | -6.455820               | -0.423658 | -0.771999 |
| 18               | 6                | 0              | -1.797706               | 1.060529  | 2.255918  |
| 19               | 1                | 0              | -1.669236               | 0.205656  | 2.928004  |
| 20               | 1                | 0              | -0.929610               | 1.717984  | 2.366845  |
| 21               | 1                | 0              | -2.696003               | 1.609862  | 2.555123  |
| 22               | 6                | 0              | 0.430289                | 0.334668  | -0.056217 |
| 23               | 6                | 0              | 0.778225                | 1.706067  | -0.069326 |
| 24               | 6                | 0              | 1.075067                | 2.884345  | -0.090309 |
| 25               | 6                | 0              | 1.432472                | 4.298419  | -0.111861 |
| 26               | 1                | 0              | 2.513328                | 4.420587  | -0.248023 |
| 27               | 1                | 0              | 0.926548                | 4.821500  | -0.931889 |
| 28               | 1                | 0              | 1.152491                | 4.788213  | 0.828160  |
| 29               | 16               | 0              | 2.636977                | -1.127223 | 0.309635  |
| 30               | 8                | 0              | 2.510009                | -0.682971 | 1.690968  |
| 31               | 8                | 0              | 1.412882                | -0.559224 | -0.610698 |
| 32               | 8                | 0              | 2.825831                | -2.525038 | -0.048336 |
| 33               | 6                | 0              | 4.091028                | -0.199037 | -0.464638 |
| 34               | 9                | 0              | 4.113451                | -0.410114 | -1.780930 |
| 35               | 9                | 0              | 3.992413                | 1.106207  | -0.219480 |
| 36               | 9                | 0              | 5.213898                | -0.672747 | 0.083531  |

-----

**PDb\_E**

SCF Done: E(RB3LYP) = -1954.20193357 a.u.

Sum of electronic and thermal Free Energies= -1954.003638 a.u.

| Center<br>Number | Atomic<br>Number | Atomic<br>Type | Coordinates (Angstroms) |           |           |
|------------------|------------------|----------------|-------------------------|-----------|-----------|
|                  |                  |                | X                       | Y         | Z         |
| 1                | 6                | 0              | -2.974178               | 1.069834  | 0.122584  |
| 2                | 6                | 0              | -1.761647               | 0.291442  | 0.644864  |
| 3                | 6                | 0              | -2.230588               | -0.935199 | 1.403428  |
| 4                | 6                | 0              | -3.717562               | -0.634580 | 1.657256  |
| 5                | 1                | 0              | -2.943474               | 1.154171  | -0.966263 |
| 6                | 1                | 0              | -2.126201               | -1.825030 | 0.769022  |
| 7                | 1                | 0              | -1.663534               | -1.107188 | 2.322910  |
| 8                | 1                | 0              | -4.331797               | -1.533850 | 1.718770  |
| 9                | 1                | 0              | -3.854599               | -0.059983 | 2.579206  |
| 10               | 7                | 0              | -4.139023               | 0.224824  | 0.520181  |
| 11               | 16               | 0              | -5.007645               | -0.540107 | -0.722020 |
| 12               | 8                | 0              | -4.893849               | 0.317078  | -1.916948 |
| 13               | 8                | 0              | -4.651007               | -1.969458 | -0.843624 |
| 14               | 6                | 0              | -6.693458               | -0.451787 | -0.102718 |
| 15               | 1                | 0              | -6.749488               | -0.974422 | 0.854116  |
| 16               | 1                | 0              | -6.966775               | 0.598209  | 0.006682  |
| 17               | 1                | 0              | -7.324969               | -0.948147 | -0.843271 |
| 18               | 6                | 0              | -3.095150               | 2.475551  | 0.727534  |
| 19               | 1                | 0              | -3.173660               | 2.433181  | 1.819049  |
| 20               | 1                | 0              | -2.212542               | 3.069812  | 0.467818  |
| 21               | 1                | 0              | -3.984069               | 2.975068  | 0.329373  |
| 22               | 6                | 0              | -0.506926               | 0.655434  | 0.459422  |
| 23               | 6                | 0              | 0.699743                | 1.006647  | 0.279719  |
| 24               | 6                | 0              | 1.951381                | 1.379041  | 0.089004  |
| 25               | 6                | 0              | 2.470395                | 2.566357  | -0.653406 |
| 26               | 1                | 0              | 3.124378                | 3.167775  | -0.009826 |
| 27               | 1                | 0              | 3.052329                | 2.262827  | -1.532744 |
| 28               | 1                | 0              | 1.637006                | 3.188223  | -0.989390 |
| 29               | 16               | 0              | 3.519739                | -0.792001 | 0.091790  |
| 30               | 8                | 0              | 2.980353                | 0.608178  | 0.739858  |
| 31               | 8                | 0              | 2.872162                | -1.072511 | -1.182190 |
| 32               | 8                | 0              | 3.594785                | -1.774981 | 1.161885  |
| 33               | 6                | 0              | 5.300435                | -0.275716 | -0.275458 |
| 34               | 9                | 0              | 5.945423                | -1.330358 | -0.780423 |
| 35               | 9                | 0              | 5.312592                | 0.720512  | -1.163873 |
| 36               | 9                | 0              | 5.900075                | 0.119928  | 0.847825  |

**PDa\_Z**

SCF Done: E(RB3LYP) = -1954.20976511 a.u.

Sum of electronic and thermal Free Energies= -1954.012487 a.u.

| Center<br>Number | Atomic<br>Number | Atomic<br>Type | Coordinates (Angstroms) |           |          |
|------------------|------------------|----------------|-------------------------|-----------|----------|
|                  |                  |                | X                       | Y         | Z        |
| 1                | 6                | 0              | 1.621043                | -0.660503 | 0.602574 |
| 2                | 6                | 0              | 0.827811                | 0.637255  | 0.536123 |

|    |    |   |           |           |           |
|----|----|---|-----------|-----------|-----------|
| 3  | 6  | 0 | 1.725439  | 1.804901  | 0.880095  |
| 4  | 6  | 0 | 3.051239  | 1.135352  | 1.293580  |
| 5  | 1  | 0 | 1.461945  | -1.276987 | -0.284137 |
| 6  | 1  | 0 | 1.871804  | 2.437888  | -0.003864 |
| 7  | 1  | 0 | 1.309302  | 2.436936  | 1.671726  |
| 8  | 1  | 0 | 3.929246  | 1.712369  | 1.001026  |
| 9  | 1  | 0 | 3.095997  | 0.971498  | 2.374618  |
| 10 | 7  | 0 | 3.041694  | -0.199100 | 0.638040  |
| 11 | 16 | 0 | 3.937836  | -0.333763 | -0.800551 |
| 12 | 8  | 0 | 3.408789  | -1.500593 | -1.530817 |
| 13 | 8  | 0 | 4.035580  | 0.959036  | -1.511371 |
| 14 | 6  | 0 | 5.573197  | -0.734884 | -0.170558 |
| 15 | 1  | 0 | 5.905988  | 0.067939  | 0.489926  |
| 16 | 1  | 0 | 5.512579  | -1.683241 | 0.364241  |
| 17 | 1  | 0 | 6.233637  | -0.812324 | -1.037414 |
| 18 | 6  | 0 | 1.326920  | -1.502129 | 1.856232  |
| 19 | 1  | 0 | 1.476367  | -0.924788 | 2.774361  |
| 20 | 1  | 0 | 0.294682  | -1.863118 | 1.841957  |
| 21 | 1  | 0 | 1.993507  | -2.370108 | 1.874707  |
| 22 | 6  | 0 | -0.451118 | 0.771152  | 0.149658  |
| 23 | 6  | 0 | -1.166160 | 1.984925  | 0.018955  |
| 24 | 6  | 0 | -1.766432 | 3.034975  | -0.099112 |
| 25 | 6  | 0 | -2.494863 | 4.291219  | -0.239012 |
| 26 | 1  | 0 | -3.572548 | 4.105629  | -0.315894 |
| 27 | 1  | 0 | -2.324936 | 4.940915  | 0.627456  |
| 28 | 1  | 0 | -2.179570 | 4.834069  | -1.137912 |
| 29 | 16 | 0 | -2.362060 | -1.067802 | 0.529013  |
| 30 | 8  | 0 | -1.119886 | -0.417904 | -0.309863 |
| 31 | 8  | 0 | -2.642432 | -0.308680 | 1.739522  |
| 32 | 8  | 0 | -2.165019 | -2.509769 | 0.543184  |
| 33 | 6  | 0 | -3.760808 | -0.751932 | -0.703188 |
| 34 | 9  | 0 | -3.971713 | 0.555098  | -0.843740 |
| 35 | 9  | 0 | -4.864402 | -1.333395 | -0.224146 |
| 36 | 9  | 0 | -3.449014 | -1.287996 | -1.883201 |

-----

**PDb\_z**

SCF Done: E(RB3LYP) = -1954.20233596 a.u.

Sum of electronic and thermal Free Energies= -1954.003258 a.u.

-----

| Center<br>Number | Atomic<br>Number | Atomic<br>Type | Coordinates (Angstroms) |           |           |
|------------------|------------------|----------------|-------------------------|-----------|-----------|
|                  |                  |                | X                       | Y         | Z         |
| 1                | 6                | 0              | 2.136177                | -0.404264 | 0.294391  |
| 2                | 6                | 0              | 1.504486                | 0.990220  | 0.364713  |
| 3                | 6                | 0              | 2.549310                | 2.001698  | 0.797326  |
| 4                | 6                | 0              | 3.670558                | 1.117227  | 1.368049  |
| 5                | 1                | 0              | 2.056696                | -0.816803 | -0.714162 |
| 6                | 1                | 0              | 2.912800                | 2.554383  | -0.078890 |
| 7                | 1                | 0              | 2.163653                | 2.727403  | 1.519367  |
| 8                | 1                | 0              | 4.661208                | 1.561229  | 1.262172  |

|    |    |   |           |           |           |
|----|----|---|-----------|-----------|-----------|
| 9  | 1  | 0 | 3.502433  | 0.897231  | 2.427477  |
| 10 | 7  | 0 | 3.573295  | -0.160211 | 0.616062  |
| 11 | 16 | 0 | 4.709181  | -0.406570 | -0.618953 |
| 12 | 8  | 0 | 4.143360  | -1.420910 | -1.528102 |
| 13 | 8  | 0 | 5.180803  | 0.871513  | -1.192895 |
| 14 | 6  | 0 | 6.084354  | -1.138283 | 0.278925  |
| 15 | 1  | 0 | 6.422349  | -0.437860 | 1.044950  |
| 16 | 1  | 0 | 5.745960  | -2.074172 | 0.724855  |
| 17 | 1  | 0 | 6.877700  | -1.314114 | -0.451341 |
| 18 | 6  | 0 | 1.522391  | -1.398607 | 1.289708  |
| 19 | 1  | 0 | 1.627317  | -1.044477 | 2.320709  |
| 20 | 1  | 0 | 0.457009  | -1.531058 | 1.076678  |
| 21 | 1  | 0 | 2.021118  | -2.368829 | 1.198383  |
| 22 | 6  | 0 | 0.241228  | 1.258742  | 0.092984  |
| 23 | 6  | 0 | -0.970946 | 1.531563  | -0.168806 |
| 24 | 6  | 0 | -2.216203 | 1.872759  | -0.442216 |
| 25 | 6  | 0 | -2.842670 | 3.228366  | -0.385220 |
| 26 | 1  | 0 | -3.685631 | 3.245206  | 0.316735  |
| 27 | 1  | 0 | -2.105812 | 3.967422  | -0.061252 |
| 28 | 1  | 0 | -3.222830 | 3.515529  | -1.373740 |
| 29 | 16 | 0 | -4.175332 | 0.094048  | -0.049498 |
| 30 | 8  | 0 | -4.193098 | 0.641535  | 1.300820  |
| 31 | 8  | 0 | -3.079402 | 0.855841  | -0.989022 |
| 32 | 8  | 0 | -5.383794 | -0.070666 | -0.842560 |
| 33 | 6  | 0 | -3.371725 | -1.613532 | 0.044679  |
| 34 | 9  | 0 | -2.199541 | -1.531014 | 0.676509  |
| 35 | 9  | 0 | -3.186242 | -2.098314 | -1.183106 |
| 36 | 9  | 0 | -4.189034 | -2.421016 | 0.726341  |

-----

**INT2'**

SCF Done: E(RB3LYP) = -1184.26972712 a.u.

Sum of electronic and thermal Free Energies= -1184.039589 a.u.

-----

| Center<br>Number | Atomic<br>Number | Atomic<br>Type | Coordinates (Angstroms) |           |           |
|------------------|------------------|----------------|-------------------------|-----------|-----------|
|                  |                  |                | X                       | Y         | Z         |
| 1                | 6                | 0              | -0.157694               | 0.126902  | -0.197092 |
| 2                | 6                | 0              | 0.826821                | -0.650966 | 0.764838  |
| 3                | 6                | 0              | 0.081268                | -0.991369 | 2.049323  |
| 4                | 6                | 0              | -1.337714               | -0.413073 | 1.794691  |
| 5                | 1                | 0              | -0.043455               | -0.229431 | -1.222074 |
| 6                | 1                | 0              | 0.056271                | -2.078200 | 2.173913  |
| 7                | 1                | 0              | 0.569609                | -0.554908 | 2.925407  |
| 8                | 1                | 0              | -2.121627               | -1.058135 | 2.190269  |
| 9                | 1                | 0              | -1.434445               | 0.579184  | 2.242466  |
| 10               | 7                | 0              | -1.452267               | -0.274075 | 0.331199  |
| 11               | 16               | 0              | -2.308581               | -1.509197 | -0.523309 |
| 12               | 8                | 0              | -1.688101               | -1.609558 | -1.853207 |
| 13               | 8                | 0              | -2.410693               | -2.704853 | 0.328274  |
| 14               | 6                | 0              | -3.939164               | -0.777981 | -0.688467 |

|    |   |   |           |           |           |
|----|---|---|-----------|-----------|-----------|
| 15 | 1 | 0 | -4.336444 | -0.575411 | 0.307549  |
| 16 | 1 | 0 | -3.847316 | 0.136968  | -1.274886 |
| 17 | 1 | 0 | -4.557229 | -1.516012 | -1.205523 |
| 18 | 6 | 0 | 2.019673  | -1.006645 | 0.437673  |
| 19 | 6 | 0 | 3.233224  | -1.374696 | 0.084486  |
| 20 | 6 | 0 | 4.373319  | -1.726417 | -0.239079 |
| 21 | 6 | 0 | 5.693450  | -2.154174 | -0.603626 |
| 22 | 1 | 0 | 6.042869  | -2.868658 | 0.158505  |
| 23 | 1 | 0 | 5.679217  | -2.687158 | -1.562522 |
| 24 | 1 | 0 | 6.399184  | -1.317359 | -0.640818 |
| 25 | 6 | 0 | 0.085544  | 1.637022  | -0.130536 |
| 26 | 6 | 0 | -0.975547 | 2.520920  | 0.104503  |
| 27 | 6 | 0 | 1.363316  | 2.154315  | -0.385507 |
| 28 | 6 | 0 | -0.759447 | 3.901984  | 0.085676  |
| 29 | 1 | 0 | -1.971352 | 2.130073  | 0.285992  |
| 30 | 6 | 0 | 1.576746  | 3.533367  | -0.410540 |
| 31 | 1 | 0 | 2.201683  | 1.487472  | -0.569909 |
| 32 | 6 | 0 | 0.515286  | 4.412669  | -0.170513 |
| 33 | 1 | 0 | -1.592042 | 4.575967  | 0.267739  |
| 34 | 1 | 0 | 2.571756  | 3.919321  | -0.613609 |
| 35 | 1 | 0 | 0.682356  | 5.486096  | -0.183464 |

-----

**TS2' a\_E**

SCF Done: E(RB3LYP) = -2145.91350287 a.u.

Sum of electronic and thermal Free Energies= -2145.670762 a.u.

-----

| Center<br>Number | Atomic<br>Number | Atomic<br>Type | Coordinates (Angstroms) |           |           |
|------------------|------------------|----------------|-------------------------|-----------|-----------|
|                  |                  |                | X                       | Y         | Z         |
| 1                | 6                | 0              | 2.092632                | 0.194376  | 0.373919  |
| 2                | 6                | 0              | 0.637140                | -0.242495 | -0.010809 |
| 3                | 6                | 0              | 0.663251                | -0.830120 | -1.406418 |
| 4                | 6                | 0              | 2.167772                | -0.830073 | -1.774598 |
| 5                | 1                | 0              | 2.307276                | -0.032370 | 1.419830  |
| 6                | 1                | 0              | 0.245761                | -1.839381 | -1.379666 |
| 7                | 1                | 0              | 0.054404                | -0.240124 | -2.096739 |
| 8                | 1                | 0              | 2.471082                | -1.749372 | -2.275811 |
| 9                | 1                | 0              | 2.417259                | 0.017795  | -2.418353 |
| 10               | 7                | 0              | 2.898363                | -0.662832 | -0.496895 |
| 11               | 16               | 0              | 3.586909                | -2.070803 | 0.204456  |
| 12               | 8                | 0              | 3.691176                | -1.812762 | 1.650222  |
| 13               | 8                | 0              | 2.882106                | -3.276057 | -0.265869 |
| 14               | 6                | 0              | 5.230884                | -2.062315 | -0.518496 |
| 15               | 1                | 0              | 5.136874                | -2.085090 | -1.605741 |
| 16               | 1                | 0              | 5.749811                | -1.162969 | -0.185144 |
| 17               | 1                | 0              | 5.733905                | -2.963394 | -0.159617 |
| 18               | 6                | 0              | -0.324745               | -0.169773 | 0.855730  |
| 19               | 6                | 0              | -1.084242               | -0.010924 | 1.924902  |
| 20               | 6                | 0              | -1.874063               | 0.094289  | 2.866163  |
| 21               | 6                | 0              | -2.780732               | 0.205161  | 3.977249  |

|    |    |   |           |           |           |
|----|----|---|-----------|-----------|-----------|
| 22 | 1  | 0 | -3.734366 | -0.246781 | 3.667570  |
| 23 | 1  | 0 | -2.410995 | -0.347413 | 4.848963  |
| 24 | 1  | 0 | -2.967109 | 1.250877  | 4.246541  |
| 25 | 16 | 0 | -3.583731 | -1.051764 | -0.324708 |
| 26 | 8  | 0 | -2.114452 | -1.064398 | -0.602489 |
| 27 | 8  | 0 | -3.938499 | -0.935475 | 1.108767  |
| 28 | 8  | 0 | -4.351067 | -2.044222 | -1.102338 |
| 29 | 6  | 0 | -4.128793 | 0.598330  | -1.044792 |
| 30 | 9  | 0 | -5.450865 | 0.780258  | -0.870861 |
| 31 | 9  | 0 | -3.484563 | 1.620213  | -0.445385 |
| 32 | 9  | 0 | -3.867152 | 0.659166  | -2.364041 |
| 33 | 6  | 0 | 2.334741  | 1.686353  | 0.105835  |
| 34 | 6  | 0 | 3.493403  | 2.107266  | -0.559922 |
| 35 | 6  | 0 | 1.440134  | 2.651081  | 0.590022  |
| 36 | 6  | 0 | 3.752489  | 3.469542  | -0.738333 |
| 37 | 1  | 0 | 4.194941  | 1.368009  | -0.931856 |
| 38 | 6  | 0 | 1.702109  | 4.011985  | 0.416307  |
| 39 | 1  | 0 | 0.532984  | 2.351816  | 1.106412  |
| 40 | 6  | 0 | 2.858654  | 4.426575  | -0.251566 |
| 41 | 1  | 0 | 4.655699  | 3.778988  | -1.257527 |
| 42 | 1  | 0 | 0.998695  | 4.746087  | 0.799667  |
| 43 | 1  | 0 | 3.059681  | 5.485260  | -0.391153 |

-----

**TS2' a\_z**

SCF Done: E(RB3LYP) = -2145.91207817 a.u.

Sum of electronic and thermal Free Energies= -2145.669301 a.u.

-----

| Center<br>Number | Atomic<br>Number | Atomic<br>Type | Coordinates (Angstroms) |           |           |
|------------------|------------------|----------------|-------------------------|-----------|-----------|
|                  |                  |                | X                       | Y         | Z         |
| 1                | 6                | 0              | -1.492135               | 0.177410  | 0.129017  |
| 2                | 6                | 0              | -0.760334               | 0.222184  | 1.486220  |
| 3                | 6                | 0              | -1.755226               | -0.148820 | 2.592337  |
| 4                | 6                | 0              | -3.034808               | -0.525084 | 1.795758  |
| 5                | 1                | 0              | -0.834056               | -0.220367 | -0.642738 |
| 6                | 1                | 0              | -1.375694               | -0.998394 | 3.166698  |
| 7                | 1                | 0              | -1.920041               | 0.685843  | 3.280169  |
| 8                | 1                | 0              | -3.529041               | -1.406524 | 2.202603  |
| 9                | 1                | 0              | -3.743349               | 0.307581  | 1.788591  |
| 10               | 7                | 0              | -2.591026               | -0.759482 | 0.407181  |
| 11               | 16               | 0              | -2.396240               | -2.385859 | -0.100704 |
| 12               | 8                | 0              | -1.270845               | -2.420639 | -1.047923 |
| 13               | 8                | 0              | -2.383340               | -3.271201 | 1.078164  |
| 14               | 6                | 0              | -3.919248               | -2.686051 | -1.005307 |
| 15               | 1                | 0              | -4.765206               | -2.526980 | -0.334408 |
| 16               | 1                | 0              | -3.955517               | -2.004354 | -1.855892 |
| 17               | 1                | 0              | -3.884411               | -3.725724 | -1.339430 |
| 18               | 6                | 0              | 0.496675                | 0.419310  | 1.747285  |
| 19               | 6                | 0              | 1.662141                | 0.581158  | 2.351625  |
| 20               | 6                | 0              | 2.788310                | 0.742789  | 2.825410  |

|    |    |   |           |           |           |
|----|----|---|-----------|-----------|-----------|
| 21 | 6  | 0 | 4.098517  | 0.930546  | 3.390411  |
| 22 | 1  | 0 | 4.787537  | 1.140275  | 2.559433  |
| 23 | 1  | 0 | 4.122352  | 1.782432  | 4.079419  |
| 24 | 1  | 0 | 4.448496  | 0.026020  | 3.901161  |
| 25 | 16 | 0 | 2.746090  | 0.618747  | -0.954690 |
| 26 | 8  | 0 | 1.317237  | 0.660360  | -0.501950 |
| 27 | 8  | 0 | 3.728287  | 0.978289  | 0.092676  |
| 28 | 8  | 0 | 2.962255  | 1.220322  | -2.283698 |
| 29 | 6  | 0 | 3.044128  | -1.216929 | -1.234789 |
| 30 | 9  | 0 | 4.307338  | -1.430942 | -1.648187 |
| 31 | 9  | 0 | 2.853074  | -1.911413 | -0.096472 |
| 32 | 9  | 0 | 2.207412  | -1.701653 | -2.168286 |
| 33 | 6  | 0 | -2.019245 | 1.559938  | -0.288858 |
| 34 | 6  | 0 | -1.191376 | 2.689609  | -0.224108 |
| 35 | 6  | 0 | -3.317610 | 1.697582  | -0.797387 |
| 36 | 6  | 0 | -1.653941 | 3.932557  | -0.663350 |
| 37 | 1  | 0 | -0.177836 | 2.599966  | 0.151680  |
| 38 | 6  | 0 | -3.780029 | 2.942310  | -1.235437 |
| 39 | 1  | 0 | -3.965983 | 0.829275  | -0.853435 |
| 40 | 6  | 0 | -2.950819 | 4.064921  | -1.169089 |
| 41 | 1  | 0 | -0.996939 | 4.796659  | -0.610654 |
| 42 | 1  | 0 | -4.789598 | 3.030225  | -1.628535 |
| 43 | 1  | 0 | -3.310283 | 5.032671  | -1.508694 |

**TS3**

SCF Done: E(RB3LYP) = -1954.14975318 a.u.

Sum of electronic and thermal Free Energies= -1953.959136 a.u.

| Center<br>Number | Atomic<br>Number | Atomic<br>Type | Coordinates (Angstroms) |           |           |
|------------------|------------------|----------------|-------------------------|-----------|-----------|
|                  |                  |                | X                       | Y         | Z         |
| 1                | 6                | 0              | -2.018048               | -1.608806 | 1.047807  |
| 2                | 6                | 0              | -2.236327               | 0.801481  | 1.015789  |
| 3                | 6                | 0              | -0.518268               | 0.990449  | -0.007349 |
| 4                | 6                | 0              | -0.289866               | -0.243246 | -0.005001 |
| 5                | 6                | 0              | -0.687861               | -1.612447 | 0.176401  |
| 6                | 1                | 0              | -2.741968               | 1.612030  | 0.495316  |
| 7                | 1                | 0              | -1.757462               | -1.608435 | 2.106008  |
| 8                | 1                | 0              | -2.582861               | -2.514851 | 0.831654  |
| 9                | 1                | 0              | -0.883300               | -2.082375 | -0.792747 |
| 10               | 1                | 0              | 0.076122                | -2.189772 | 0.706619  |
| 11               | 7                | 0              | -2.815999               | -0.422753 | 0.764082  |
| 12               | 6                | 0              | -0.197002               | 2.304261  | -0.277449 |
| 13               | 6                | 0              | 0.042130                | 3.476368  | -0.497733 |
| 14               | 6                | 0              | 0.354942                | 4.870489  | -0.778532 |
| 15               | 1                | 0              | 1.331803                | 4.955481  | -1.268206 |
| 16               | 1                | 0              | -0.398997               | 5.312724  | -1.440120 |
| 17               | 1                | 0              | 0.384017                | 5.457657  | 0.146712  |
| 18               | 16               | 0              | -3.951802               | -0.531818 | -0.584956 |
| 19               | 8                | 0              | -4.148078               | 0.838388  | -1.066533 |
| 20               | 8                | 0              | -3.466232               | -1.583979 | -1.482076 |
| 21               | 6                | 0              | -5.433743               | -1.093454 | 0.257937  |

|    |    |   |           |           |           |
|----|----|---|-----------|-----------|-----------|
| 22 | 1  | 0 | -5.227408 | -2.051121 | 0.738296  |
| 23 | 1  | 0 | -5.723205 | -0.333503 | 0.984787  |
| 24 | 1  | 0 | -6.196961 | -1.208922 | -0.515661 |
| 25 | 6  | 0 | -1.782644 | 1.125099  | 2.417949  |
| 26 | 1  | 0 | -1.244864 | 2.075482  | 2.423884  |
| 27 | 1  | 0 | -2.683017 | 1.238239  | 3.036404  |
| 28 | 1  | 0 | -1.144890 | 0.359138  | 2.861331  |
| 29 | 16 | 0 | 2.961477  | -1.337505 | -0.439843 |
| 30 | 8  | 0 | 2.556860  | -2.121732 | 0.751036  |
| 31 | 8  | 0 | 1.827125  | -0.679625 | -1.156216 |
| 32 | 8  | 0 | 3.957477  | -1.975378 | -1.326385 |
| 33 | 6  | 0 | 3.898458  | 0.118555  | 0.295481  |
| 34 | 9  | 0 | 3.116919  | 0.818586  | 1.142866  |
| 35 | 9  | 0 | 4.321032  | 0.958753  | -0.668551 |
| 36 | 9  | 0 | 4.977864  | -0.304808 | 0.981634  |

**PDC**

SCF Done: E(RB3LYP) = -1954.21555938 a.u.

Sum of electronic and thermal Free Energies= -1954.016222 a.u.

| Center<br>Number | Atomic<br>Number | Atomic<br>Type | Coordinates (Angstroms) |           |           |
|------------------|------------------|----------------|-------------------------|-----------|-----------|
|                  |                  |                | X                       | Y         | Z         |
| 1                | 6                | 0              | -2.051439               | -1.488387 | 1.070390  |
| 2                | 6                | 0              | -1.929810               | 0.973701  | 0.757385  |
| 3                | 6                | 0              | -0.499931               | 0.764331  | 0.234288  |
| 4                | 6                | 0              | -0.032788               | -0.480234 | 0.020700  |
| 5                | 6                | 0              | -0.789374               | -1.752041 | 0.239515  |
| 6                | 1                | 0              | -2.386362               | 1.727942  | 0.110251  |
| 7                | 1                | 0              | -1.787515               | -1.356658 | 2.124129  |
| 8                | 1                | 0              | -2.743111               | -2.327215 | 1.003246  |
| 9                | 1                | 0              | -1.043263               | -2.197723 | -0.732587 |
| 10               | 1                | 0              | -0.166068               | -2.485694 | 0.766745  |
| 11               | 7                | 0              | -2.745561               | -0.256170 | 0.655450  |
| 12               | 6                | 0              | 0.256670                | 1.941742  | -0.019353 |
| 13               | 6                | 0              | 0.833980                | 2.992370  | -0.218920 |
| 14               | 6                | 0              | 1.555435                | 4.237778  | -0.464169 |
| 15               | 1                | 0              | 2.620072                | 4.126813  | -0.226878 |
| 16               | 1                | 0              | 1.474973                | 4.536942  | -1.516221 |
| 17               | 1                | 0              | 1.153867                | 5.053095  | 0.148752  |
| 18               | 16               | 0              | -3.814532               | -0.362672 | -0.655764 |
| 19               | 8                | 0              | -3.300208               | 0.381831  | -1.822580 |
| 20               | 8                | 0              | -4.158302               | -1.787331 | -0.813693 |
| 21               | 6                | 0              | -5.268585               | 0.510077  | -0.054302 |
| 22               | 1                | 0              | -5.645244               | -0.013778 | 0.825081  |
| 23               | 1                | 0              | -4.993506               | 1.538255  | 0.187774  |
| 24               | 1                | 0              | -6.001426               | 0.495460  | -0.864592 |
| 25               | 6                | 0              | -1.939686               | 1.512309  | 2.198377  |
| 26               | 1                | 0              | -1.345560               | 2.429381  | 2.258383  |
| 27               | 1                | 0              | -2.965749               | 1.739858  | 2.503347  |
| 28               | 1                | 0              | -1.516166               | 0.787887  | 2.900972  |
| 29               | 16               | 0              | 2.478420                | -1.323687 | 0.166441  |
| 30               | 8                | 0              | 2.846330                | -2.544694 | -0.535438 |
| 31               | 8                | 0              | 2.270757                | -1.295118 | 1.608975  |



|    |   |   |          |           |           |
|----|---|---|----------|-----------|-----------|
| 32 | 8 | 0 | 1.225807 | -0.616656 | -0.619615 |
| 33 | 6 | 0 | 3.800924 | -0.041757 | -0.266867 |
| 34 | 9 | 0 | 4.981382 | -0.541996 | 0.110188  |
| 35 | 9 | 0 | 3.571435 | 1.095133  | 0.384842  |
| 36 | 9 | 0 | 3.808774 | 0.179839  | -1.580679 |

---
